# Supplementary material for: The Embryo Characteristics and Genes Expression Analysis Involved in Apomixis of Wild Germplasm Materials of Kentucky Bluegrass in Gansu Province of China
Source: Research Square preprint supplement (doi:10.21203/rs.3.rs-146413/v1), 2021-01-18
Supplement: Supplementary file 1 [file 841d28d8bb98fcd72638a0b3.xlsx]

## Sheet: Sheet1
Table S15 Primer sequences used for qRT-PCR analysis in this article
Name	Description	Forward primer	Reverse primert
guaA	GMP synthase (glutamine-hydrolysing)	GTACACCCACCTCATCACCC	AAATCGAGGAATCCGTCGGG
ACR4	ACT domain-containing protein ACR3-like	CGACAACTGGGAAGAGAGGG	ACGTACTGCATGTCGGTGAG
NEDD8	ubiquitin-like protein NEDD8	AAGAATCCACGCTCCACCTC	CTATCCACAGTGTCGGTCGG
LEA19	Late embryogenesis abundant protein 19	AAACTCAGGCTGTCACCACG	CTCGGTCTTCTCGCCAAGG
TRIUR3_32356	hypothetical protein TRIUR3_32356	CATGCGGATCCTGCTCGATA	GACTGGGGTAGGGGTACCAT
RINT1	RAD50-interacting protein 1	GCCGTTTCGTCTGTTGTGAC	GGCAGATATAAGGCGGGTCC
GST, gst	glutathione S-transferase	CGCTAGCCGAGAAGAACCTC	TGGGTTGGATTGGAGAAGCC
CHD4, MI2B	chromodomain-helicase-DNA-binding protein 4	AGCTGAAAGAGCAGGGTCAC	TCTTGGCATTGAAGCGGTCT
MADS8	MADS-box transcription factor 8	GGTGAAAGAAGCCATTGCCG	CTCTACGACTCCATCGACGC
AGO	Protein argonaute 1B	TCGTGCTACGTGAATTGCCT	AGCCCCATCTGTGTAGGTCT
ANT	ADP,ATP carrier protein	CATTCGACGCATTCCAGCAG	GATCTGGAGCTGGTCGTAGC
OFUT19	O-fucosyltransferase 19	CGCGCTGAAAGCTGAATACC	ACAGCAGCTAGCCTGTTCTG
TM9SF2_4	transmembrane 9 superfamily member 2/4	CGACGATGTTCCCCGGTATC	GAGATGCCGAACCAGAGGAG
CAT2	Catalase isozyme 2	CTCTACGACTCCATCGACGC	CGAAGTCGAACCTGTCCTCC
EED	polycomb protein EED	TGTCGTTTGATGGAAGCACG	CAGTTTTTCGCGGCTGGATG
WOX8	WUSCHEL-related homeobox 8	CTCGGTCTTGTTGACCTCTTCA	TGCAAACCGTAGACTGCCTG
Actin		CTACGTCCCTGCCCTTTGTACA	ACACTTCACCGGACCATTCAA
		TGTTGGATTCTGGTGATGGTGTC
		AGGATGGCGTGCGGAAGG
