# Supplementary material for: The Embryo Characteristics and Genes Expression Analysis Involved in Apomixis of Wild Germplasm Materials of Kentucky Bluegrass in Gansu Province of China
Source: Research Square preprint supplement (doi:10.21203/rs.3.rs-146413/v1), 2021-01-18
Supplement: Supplementary file 2 [file 862f048abf73490b7075ebe4.xlsx]

## Sheet: Sheet1
Table S10 All unigenes in 18 modules
all	black	blue	pink	cyan	greenyellow	lightcyan	purple	tan	green	grey	magenta	red	turquise	brown	grey60	midnightblue	salmon	yellow
Cluster-51324.141806	Cluster-51324.106342	Cluster-51324.98472	Cluster-51324.141388	Cluster-51324.182796	Cluster-51324.94096	Cluster-51324.120785	Cluster-51324.69246	Cluster-51324.100966	Cluster-51324.104214	Cluster-51324.93136	Cluster-51324.3980	Cluster-51324.54413	Cluster-51324.94670	Cluster-51324.76383	Cluster-51324.81049	Cluster-51324.101228	Cluster-51324.52021	Cluster-51324.141806
Cluster-51324.94670	Cluster-51324.160408	Cluster-51324.112113	Cluster-51324.56995	Cluster-51324.141954	Cluster-51324.112271	Cluster-51324.65452	Cluster-51324.97988	Cluster-51324.101443	Cluster-51324.154644	Cluster-51324.128197	Cluster-51324.95511	Cluster-51324.98599	Cluster-51324.105296	Cluster-51324.101897	Cluster-61111.0	Cluster-51324.121223	Cluster-51324.51887	Cluster-51324.100783
Cluster-51324.76383	Cluster-51324.90356	Cluster-51324.86299	Cluster-51324.151231	Cluster-51324.60203	Cluster-51324.93164	Cluster-51324.106505	Cluster-51324.110502	Cluster-51324.83998	Cluster-51324.63181	Cluster-51324.113053	Cluster-51324.90061	Cluster-51324.157520	Cluster-51324.90860	Cluster-51324.95605	Cluster-51324.126682	Cluster-51324.108149	Cluster-51324.147581	Cluster-51324.151233
Cluster-51324.101897	Cluster-51324.107676	Cluster-51324.99956	Cluster-51324.125611	Cluster-51324.99148	Cluster-51324.81814	Cluster-51324.91309	Cluster-51324.96930	Cluster-51324.128331	Cluster-51324.112121	Cluster-51324.61435	Cluster-51324.101005	Cluster-51324.143012	Cluster-51324.147757	Cluster-51324.180177	Cluster-51324.105469	Cluster-51324.101929	Cluster-51324.52542	Cluster-51324.96419
Cluster-51324.105296	Cluster-51324.80857	Cluster-51324.108051	Cluster-51324.49112	Cluster-51324.117911	Cluster-51324.112883	Cluster-51324.168306	Cluster-51324.96397	Cluster-51324.109896	Cluster-51324.98434	Cluster-51324.92453	Cluster-51324.88133	Cluster-51324.31096	Cluster-51324.84949	Cluster-51324.133940	Cluster-51324.18040	Cluster-51324.92140	Cluster-51324.108800	Cluster-51324.64001
Cluster-51324.104214	Cluster-51324.86868	Cluster-51324.87692	Cluster-51324.152394	Cluster-51324.101671	Cluster-51324.101227	Cluster-51324.153968	Cluster-51324.96764	Cluster-51324.97849	Cluster-51324.141764	Cluster-51324.128585	Cluster-51324.107079	Cluster-51324.54357	Cluster-51324.71705	Cluster-51324.62102	Cluster-51324.96337	Cluster-51324.110074	Cluster-51324.50415	Cluster-51324.59042
Cluster-51324.100783	Cluster-51324.76740	Cluster-51324.119770	Cluster-51324.155293	Cluster-51324.117877	Cluster-51324.85201	Cluster-51324.127978	Cluster-51324.101795	Cluster-51324.144697	Cluster-51324.86383	Cluster-51324.97548	Cluster-51324.73536	Cluster-51324.66643	Cluster-51324.40759	Cluster-51324.84185	Cluster-51324.44342	Cluster-51324.90835	Cluster-51324.148931	Cluster-51324.118353
Cluster-51324.90860	Cluster-51324.86512	Cluster-51324.91232	Cluster-51324.155264	Cluster-51324.67687	Cluster-51324.87519	Cluster-51324.84340	Cluster-51324.88962	Cluster-51324.81842	Cluster-51324.95594	Cluster-51324.64954	Cluster-51324.99019	Cluster-51324.52402	Cluster-51324.102439	Cluster-51324.95860	Cluster-51324.82808	Cluster-51324.102727	Cluster-51324.161123	Cluster-51324.103380
Cluster-51324.151233	Cluster-51324.97065	Cluster-51324.85259	Cluster-51324.141319	Cluster-51324.88355	Cluster-51324.105684	Cluster-51324.46677	Cluster-51324.103312	Cluster-51324.50227	Cluster-51324.99380		Cluster-51324.93223	Cluster-51324.143190	Cluster-51324.95620	Cluster-51324.96885	Cluster-51324.44340	Cluster-51324.94292	Cluster-51324.42827	Cluster-51324.94767
Cluster-51324.54413	Cluster-51324.90353	Cluster-51324.45322	Cluster-51324.49986	Cluster-51324.31734	Cluster-51324.116971	Cluster-51324.90230	Cluster-51324.60516	Cluster-51324.158794	Cluster-51324.46323		Cluster-51324.98140	Cluster-51324.76394	Cluster-51324.128906	Cluster-51324.75631	Cluster-51324.98781	Cluster-51324.101198	Cluster-51324.145347	Cluster-51324.103880
Cluster-51324.154644	Cluster-51324.79049	Cluster-51324.66771	Cluster-51324.87073	Cluster-51324.104157	Cluster-51324.94675	Cluster-51324.103281	Cluster-51324.93514	Cluster-51324.143029	Cluster-51324.156868		Cluster-51324.98142	Cluster-51324.53255	Cluster-51324.115781	Cluster-51324.100644	Cluster-51324.124662	Cluster-51324.90547	Cluster-51324.141672	Cluster-51324.105827
Cluster-51324.95605	Cluster-51324.136762	Cluster-51324.142639	Cluster-51324.53145	Cluster-51324.196623	Cluster-51324.95304	Cluster-51324.84346	Cluster-51324.106237	Cluster-51324.103831	Cluster-51324.48709		Cluster-51324.99463	Cluster-51324.48773	Cluster-51324.89899	Cluster-51324.147340	Cluster-51324.120216	Cluster-51324.98634	Cluster-51324.144265	Cluster-51324.89011
Cluster-51324.106342	Cluster-51324.36082	Cluster-51324.81584	Cluster-51324.74484	Cluster-51324.147265	Cluster-51324.96503	Cluster-51324.127979	Cluster-51324.80278	Cluster-51324.105231	Cluster-51324.152431		Cluster-51324.108749	Cluster-51324.121530	Cluster-51324.78064	Cluster-51324.135834	Cluster-51324.86902	Cluster-51324.162929	Cluster-51324.52405	Cluster-51324.98892
Cluster-51324.180177	Cluster-51324.135180	Cluster-51324.126960	Cluster-51324.142774	Cluster-51324.84536	Cluster-51324.84295	Cluster-51324.76349	Cluster-51324.109290	Cluster-51324.139586	Cluster-51324.99674		Cluster-51324.98541	Cluster-51324.16615	Cluster-51324.94578	Cluster-51324.94102	Cluster-51324.96492	Cluster-51324.101196	Cluster-51324.142592	Cluster-51324.101930
Cluster-51324.63181	Cluster-51324.70438	Cluster-51324.70810	Cluster-51324.104259	Cluster-51324.106576	Cluster-51324.89878	Cluster-51324.121594	Cluster-51324.100894	Cluster-51324.143027	Cluster-51324.98723		Cluster-51324.90099	Cluster-51324.201998	Cluster-51324.83477	Cluster-51324.81841	Cluster-51324.83249	Cluster-51324.95230	Cluster-51324.117027	Cluster-51324.97101
Cluster-51324.98599	Cluster-51324.95716	Cluster-51324.68213	Cluster-51324.151247	Cluster-51324.95732	Cluster-51324.110249	Cluster-51324.61723	Cluster-51324.146152	Cluster-51324.93390	Cluster-51324.100785		Cluster-51324.109090	Cluster-51324.25855	Cluster-51324.109256	Cluster-51324.56957	Cluster-51324.109166	Cluster-51324.109643	Cluster-51324.142621	Cluster-51324.126203
Cluster-51324.147757	Cluster-51324.185557	Cluster-51324.79408	Cluster-51324.77570	Cluster-51324.144896	Cluster-51324.88408	Cluster-51324.151727	Cluster-51324.90852	Cluster-51324.165001	Cluster-51324.123642		Cluster-51324.100117	Cluster-51324.70437	Cluster-51324.102371	Cluster-51324.85112	Cluster-51324.160337	Cluster-51324.90492	Cluster-51324.70587	Cluster-51324.91661
Cluster-51324.96419	Cluster-51324.135865	Cluster-51324.113871	Cluster-51324.123379	Cluster-51324.56317	Cluster-51324.94515	Cluster-51324.72940	Cluster-51324.147187	Cluster-51324.76145	Cluster-51324.30051		Cluster-51324.75198	Cluster-51324.154670	Cluster-51324.99939	Cluster-51324.64752	Cluster-51324.103829	Cluster-51324.90538	Cluster-51324.49477	Cluster-51324.110418
Cluster-51324.98472	Cluster-51324.143565	Cluster-51324.93741	Cluster-51324.98147	Cluster-51324.140679	Cluster-51324.94155	Cluster-51324.102921	Cluster-51324.90850	Cluster-51324.110565	Cluster-51324.58276		Cluster-51324.119199	Cluster-51324.166972	Cluster-51324.96231	Cluster-51324.106991	Cluster-51324.89445	Cluster-51324.86556	Cluster-51324.152195	Cluster-51324.90014
Cluster-51324.84949	Cluster-51324.123075	Cluster-51324.68993	Cluster-51324.89474	Cluster-51324.88117	Cluster-51324.84636	Cluster-51324.92777	Cluster-51324.153145	Cluster-51324.158793	Cluster-51324.155444		Cluster-51324.89695	Cluster-51324.158751	Cluster-51324.95953	Cluster-51324.87683	Cluster-51324.98130	Cluster-51324.108190	Cluster-51324.50416	Cluster-51324.49616
Cluster-51324.112121	Cluster-51324.34326	Cluster-51324.127128	Cluster-51324.52216	Cluster-51324.95662	Cluster-51324.85039	Cluster-51324.90373	Cluster-51324.59676	Cluster-51324.108459	Cluster-51324.102768		Cluster-51324.92866	Cluster-51324.85675	Cluster-51324.97263	Cluster-51324.63300	Cluster-51324.100835	Cluster-51324.95770	Cluster-51324.51709	Cluster-51324.114601
Cluster-51324.133940	Cluster-51324.127157	Cluster-51324.38916	Cluster-51324.112240	Cluster-51324.91468	Cluster-51324.81519	Cluster-51324.117587	Cluster-51324.97596	Cluster-51324.88009	Cluster-51324.99486		Cluster-51324.98621	Cluster-51324.46521	Cluster-51324.50906	Cluster-51324.92266	Cluster-52788.0	Cluster-51324.76010	Cluster-51324.51094	Cluster-51324.94176
Cluster-51324.157520	Cluster-51324.103275	Cluster-51324.96208	Cluster-51324.148929	Cluster-51324.94105	Cluster-51324.93828	Cluster-51324.93691	Cluster-51324.106592	Cluster-51324.87106	Cluster-51324.30910		Cluster-51324.88639	Cluster-51324.40698	Cluster-51324.88064	Cluster-51324.101606	Cluster-51324.127099	Cluster-51324.105386	Cluster-51324.53478	Cluster-51324.92961
Cluster-51324.112113	Cluster-51324.70319	Cluster-51324.78116	Cluster-51324.29370	Cluster-51324.86340	Cluster-51324.69370	Cluster-51324.87539	Cluster-51324.87049	Cluster-51324.102923	Cluster-51324.97872		Cluster-51324.76105	Cluster-51324.112685	Cluster-51324.95699	Cluster-51324.103750	Cluster-51324.90315	Cluster-51324.113392	Cluster-51324.70591	Cluster-51324.63234
Cluster-51324.86299	Cluster-51324.88105	Cluster-51324.95483	Cluster-51324.150263	Cluster-51324.101643	Cluster-51324.87215	Cluster-51324.111993	Cluster-51324.97895	Cluster-51324.129302	Cluster-51324.44719		Cluster-51324.93909	Cluster-51324.70297	Cluster-51324.103782	Cluster-51324.113206	Cluster-51324.86538	Cluster-51324.91308	Cluster-51324.54116	Cluster-51324.63383
Cluster-51324.99956	Cluster-51324.143253	Cluster-51324.102703	Cluster-51324.143520	Cluster-51324.135700	Cluster-51324.92036	Cluster-51324.96545	Cluster-51324.121846	Cluster-51324.98770	Cluster-51324.118421		Cluster-51324.87583	Cluster-51324.89615	Cluster-51324.77293	Cluster-51324.69016	Cluster-51324.131889	Cluster-51324.80951	Cluster-51324.132668	Cluster-51324.86420
Cluster-51324.108051	Cluster-51324.127531	Cluster-51324.7259	Cluster-51324.143478	Cluster-51324.84076	Cluster-51324.80632	Cluster-51324.107616	Cluster-51324.124476	Cluster-51324.51789	Cluster-51324.94537		Cluster-51324.88993	Cluster-51324.178668	Cluster-51324.95384	Cluster-51324.114779	Cluster-51324.124115	Cluster-51324.105388	Cluster-51324.114184	Cluster-51324.107165
Cluster-51324.87692	Cluster-51324.46040	Cluster-51324.78567	Cluster-51324.141451	Cluster-51324.7931	Cluster-51324.94645	Cluster-51324.78014	Cluster-51324.107936	Cluster-51324.112222	Cluster-51324.65672		Cluster-51324.44911	Cluster-51324.89425	Cluster-51324.81484	Cluster-51324.73829	Cluster-51324.16613	Cluster-51324.98642	Cluster-51324.52749	Cluster-51324.86583
Cluster-51324.62102	Cluster-51324.91515	Cluster-51324.72287	Cluster-51324.125455	Cluster-51324.102639	Cluster-51324.103104	Cluster-51324.92773	Cluster-51324.106238	Cluster-51324.124232	Cluster-51324.81373		Cluster-51324.92970	Cluster-51324.81529	Cluster-51324.110206	Cluster-51324.63037	Cluster-51324.109165	Cluster-51324.108239	Cluster-51324.51938	Cluster-51324.168217
Cluster-51324.71705	Cluster-51324.87122	Cluster-51324.87682	Cluster-51324.111318	Cluster-51324.67681	Cluster-51324.170349	Cluster-51324.105106	Cluster-51324.95626	Cluster-51324.9842	Cluster-51324.119738		Cluster-51324.126664	Cluster-51324.89543	Cluster-51324.98185	Cluster-51324.123926	Cluster-51324.68324	Cluster-51324.99395	Cluster-51324.149452	Cluster-51324.142713
Cluster-51324.94096	Cluster-51324.148479	Cluster-51324.114020	Cluster-51324.51183	Cluster-51324.67614	Cluster-51324.93074	Cluster-51324.113758	Cluster-51324.85650	Cluster-51324.142622	Cluster-51324.79951		Cluster-51324.86796	Cluster-51324.69781	Cluster-51324.84140	Cluster-51324.103723	Cluster-51324.87756	Cluster-51324.101234	Cluster-51324.144613	Cluster-51324.129554
Cluster-51324.84185	Cluster-51324.107518	Cluster-51324.131961	Cluster-51324.79800	Cluster-51324.137590	Cluster-51324.95720	Cluster-51324.104245	Cluster-51324.70089	Cluster-51324.102157	Cluster-51324.97794		Cluster-51324.96723	Cluster-51324.99747	Cluster-51324.88997	Cluster-51324.103748	Cluster-51324.39242	Cluster-51324.94474	Cluster-51324.146791	Cluster-51324.159043
Cluster-51324.64001	Cluster-51324.83723	Cluster-51324.193893	Cluster-51324.115733	Cluster-51324.79328	Cluster-51324.96917	Cluster-51324.86619	Cluster-51324.93960	Cluster-51324.52293	Cluster-51324.94198		Cluster-51324.94056	Cluster-51324.89654	Cluster-51324.129813	Cluster-51324.114066	Cluster-51324.95507	Cluster-51324.96806	Cluster-51324.44740	Cluster-51324.90608
Cluster-51324.95860	Cluster-51324.91388	Cluster-51324.134864	Cluster-51324.64231	Cluster-51324.97658	Cluster-51324.86848	Cluster-51324.99921	Cluster-51324.111293	Cluster-51324.123125	Cluster-51324.67679		Cluster-51324.113059	Cluster-51324.49225	Cluster-51324.124782	Cluster-51324.116733	Cluster-51324.144974	Cluster-51324.89017	Cluster-51324.55411	Cluster-51324.94085
Cluster-51324.143012	Cluster-51324.84719	Cluster-51324.132764	Cluster-51324.103438	Cluster-51324.115553	Cluster-51324.91929	Cluster-51324.92661	Cluster-51324.95726	Cluster-51324.127321	Cluster-51324.106354		Cluster-51324.91400	Cluster-51324.30489	Cluster-51324.94746	Cluster-51324.67422	Cluster-51324.100889	Cluster-51324.102348	Cluster-51324.146483	Cluster-51324.76511
Cluster-51324.96885	Cluster-51324.82454	Cluster-51324.90494	Cluster-51324.164264	Cluster-51324.112224	Cluster-51324.105546	Cluster-51324.85063	Cluster-51324.108390	Cluster-51324.86961	Cluster-51324.83974		Cluster-51324.77682	Cluster-51324.16616	Cluster-51324.93325	Cluster-51324.79168	Cluster-51324.96507	Cluster-51324.56351	Cluster-51324.54010	Cluster-51324.174820
Cluster-51324.40759	Cluster-51324.70790	Cluster-51324.68924	Cluster-51324.151198	Cluster-51324.148239	Cluster-51324.100025	Cluster-51324.104551	Cluster-51324.117414	Cluster-51324.106338	Cluster-51324.87284		Cluster-51324.80817	Cluster-51324.130736	Cluster-51324.101829	Cluster-51324.53650	Cluster-51324.115963	Cluster-51324.134657	Cluster-51324.142038	Cluster-51324.75604
Cluster-51324.98434	Cluster-51324.82405	Cluster-51324.130619	Cluster-51324.47874	Cluster-51324.10339	Cluster-51324.103459	Cluster-51324.89018	Cluster-51324.94643	Cluster-51324.103826	Cluster-51324.85287		Cluster-51324.106076	Cluster-51324.120802	Cluster-51324.93257	Cluster-51324.117046	Cluster-51324.101714	Cluster-51324.129299	Cluster-51324.33132	Cluster-51324.86982
Cluster-51324.75631	Cluster-51324.81167	Cluster-51324.85101	Cluster-51324.43801	Cluster-51324.85061	Cluster-51324.97399	Cluster-51324.93189	Cluster-51324.91624	Cluster-51324.66908	Cluster-51324.127872		Cluster-51324.107447	Cluster-51324.164195	Cluster-51324.97201	Cluster-51324.116952	Cluster-51324.93015	Cluster-51324.101189	Cluster-51324.110392	Cluster-51324.93495
Cluster-51324.141764	Cluster-51324.60250	Cluster-51324.99356	Cluster-51324.135696	Cluster-51324.92841	Cluster-51324.70704	Cluster-51324.120432	Cluster-51324.103313	Cluster-51324.85956	Cluster-51324.103461		Cluster-51324.95779	Cluster-51324.165935	Cluster-51324.98491	Cluster-51324.143425	Cluster-51324.71256	Cluster-51324.93781	Cluster-51324.143877	Cluster-51324.127641
Cluster-51324.100644	Cluster-51324.71807	Cluster-51324.201122	Cluster-51324.41566	Cluster-51324.14438	Cluster-51324.95874	Cluster-51324.84344	Cluster-51324.115817	Cluster-51324.62515	Cluster-51324.77829		Cluster-51324.97660	Cluster-51324.93824	Cluster-51324.93543	Cluster-51324.120196	Cluster-51324.74878	Cluster-51324.95718	Cluster-51324.142591	Cluster-51324.168575
Cluster-51324.86383	Cluster-51324.69416	Cluster-51324.64767	Cluster-51324.89167	Cluster-51324.139558	Cluster-51324.111128	Cluster-51324.120250	Cluster-51324.136342	Cluster-51324.60806	Cluster-51324.53747		Cluster-51324.94651	Cluster-51324.39326	Cluster-51324.94316	Cluster-51324.146092	Cluster-51324.97917	Cluster-51324.107668	Cluster-51324.50452	Cluster-51324.96094
Cluster-51324.59042	Cluster-51324.104203	Cluster-51324.61244	Cluster-51324.172580	Cluster-51324.85935	Cluster-51324.94759	Cluster-51324.105345	Cluster-51324.100319	Cluster-51324.72759	Cluster-51324.79443		Cluster-51324.94097	Cluster-51324.60068	Cluster-51324.82903	Cluster-51324.121347	Cluster-51324.82927	Cluster-51324.89437	Cluster-51324.135626	Cluster-51324.83824
Cluster-51324.119770	Cluster-51324.117319	Cluster-51324.66838	Cluster-51324.149252	Cluster-51324.130140	Cluster-51324.105685	Cluster-51324.77882	Cluster-51324.115394	Cluster-51324.111058	Cluster-51324.68463		Cluster-51324.96352	Cluster-51324.53097	Cluster-51324.38109	Cluster-51324.192590	Cluster-51324.79859	Cluster-51324.89723	Cluster-51324.131100	Cluster-51324.143958
Cluster-51324.31096	Cluster-51324.117322	Cluster-51324.80286	Cluster-51324.159861	Cluster-51324.102084	Cluster-51324.96199	Cluster-51324.107284	Cluster-51324.55803	Cluster-51324.178559	Cluster-51324.112679		Cluster-51324.78686	Cluster-51324.113024	Cluster-51324.105607	Cluster-51324.75245	Cluster-51324.102261	Cluster-51324.98789	Cluster-51324.149721	Cluster-51324.79572
Cluster-51324.91232	Cluster-51324.79825	Cluster-51324.93819	Cluster-51324.92452	Cluster-51324.101713	Cluster-51324.104749	Cluster-51324.104154	Cluster-51324.94422	Cluster-51324.90721	Cluster-51324.109245		Cluster-51324.99195	Cluster-51324.139787	Cluster-51324.89009	Cluster-51324.75675	Cluster-51324.112490	Cluster-51324.96022	Cluster-51324.110411	Cluster-51324.96207
Cluster-51324.147340	Cluster-51324.98537	Cluster-51324.87240	Cluster-51324.74131	Cluster-51324.195367	Cluster-51324.94051	Cluster-51324.96523	Cluster-51324.84450	Cluster-51324.141955	Cluster-51324.95331		Cluster-51324.92032	Cluster-51324.24135	Cluster-51324.97362	Cluster-51324.93930	Cluster-51324.120973	Cluster-51324.99042	Cluster-51324.50610	Cluster-51324.85432
Cluster-51324.95594	Cluster-51324.86074	Cluster-51324.61059	Cluster-51324.54508	Cluster-51324.196706	Cluster-51324.111867	Cluster-51324.124810	Cluster-51324.142431	Cluster-51324.90389	Cluster-51324.39201		Cluster-51324.91805	Cluster-51324.105799	Cluster-51324.92215	Cluster-51324.82478	Cluster-51324.89823	Cluster-51324.103557	Cluster-51324.146749	Cluster-51324.88439
Cluster-51324.135834	Cluster-51324.121294	Cluster-51324.119410	Cluster-51324.139122	Cluster-51324.97916	Cluster-51324.94564	Cluster-51324.135504	Cluster-51324.83146	Cluster-51324.72788	Cluster-51324.108771		Cluster-51324.73897	Cluster-51324.143183	Cluster-51324.86272	Cluster-51324.156838	Cluster-51324.90581	Cluster-51324.89632	Cluster-51324.141321	Cluster-51324.95920
Cluster-51324.94102	Cluster-51324.53008	Cluster-51324.109289	Cluster-51324.50382	Cluster-51324.152234	Cluster-51324.93897	Cluster-51324.88772	Cluster-51324.108284	Cluster-51324.89259	Cluster-51324.120834		Cluster-51324.99650	Cluster-51324.74027	Cluster-51324.92848	Cluster-51324.97413	Cluster-51324.93013	Cluster-51324.95497	Cluster-51324.141230	Cluster-51324.54372
Cluster-51324.101228	Cluster-51324.143999	Cluster-51324.122869	Cluster-51324.120820	Cluster-51324.196244	Cluster-51324.84132	Cluster-51324.95528	Cluster-51324.64742	Cluster-51324.96252	Cluster-51324.116869		Cluster-51324.98019	Cluster-51324.126046	Cluster-51324.86630	Cluster-51324.97998	Cluster-51324.88608	Cluster-51324.123459	Cluster-51324.53425	Cluster-51324.105830
Cluster-51324.102439	Cluster-51324.121654	Cluster-51324.110548	Cluster-51324.109105	Cluster-51324.118992	Cluster-51324.84135	Cluster-51324.91059	Cluster-51324.105491	Cluster-51324.72755	Cluster-51324.120797		Cluster-51324.97963	Cluster-51324.143151	Cluster-51324.110508	Cluster-51324.129991	Cluster-51324.104905	Cluster-51324.93413	Cluster-51324.93755	Cluster-51324.105038
Cluster-51324.81841	Cluster-51324.50924	Cluster-51324.33134	Cluster-51324.87066	Cluster-51324.5270	Cluster-51324.108077	Cluster-51324.80409	Cluster-51324.101965	Cluster-51324.112093	Cluster-51324.125868		Cluster-51324.126092	Cluster-51324.42434	Cluster-51324.94006	Cluster-51324.118729	Cluster-51324.126852	Cluster-51324.86631	Cluster-51324.87669	Cluster-51324.100862
Cluster-51324.85259	Cluster-51324.98564	Cluster-51324.52425	Cluster-51324.149249	Cluster-51324.106135	Cluster-51324.96919	Cluster-51324.89213	Cluster-51324.31514	Cluster-51324.170142	Cluster-51324.44436		Cluster-51324.117075	Cluster-51324.63483	Cluster-51324.92153	Cluster-51324.23963	Cluster-51324.41751	Cluster-51324.126264	Cluster-51324.53642	Cluster-51324.103785
Cluster-51324.99380	Cluster-51324.51199	Cluster-51324.140132	Cluster-51324.144706	Cluster-51324.136656	Cluster-51324.132977	Cluster-51324.105342	Cluster-51324.164496	Cluster-51324.101448	Cluster-51324.88805		Cluster-51324.31907	Cluster-51324.148468	Cluster-51324.93388	Cluster-51324.97557	Cluster-51324.101670	Cluster-51324.98647	Cluster-51324.48403	Cluster-51324.91429
Cluster-51324.95620	Cluster-51324.162280	Cluster-51324.150155	Cluster-51324.131765	Cluster-51324.197583	Cluster-51324.93063	Cluster-51324.125786	Cluster-51324.58743	Cluster-51324.127412	Cluster-51324.43126		Cluster-51324.82308	Cluster-51324.50760	Cluster-51324.73933	Cluster-51324.102119	Cluster-51324.104904	Cluster-51324.93598	Cluster-51324.114204	Cluster-51324.127308
Cluster-51324.128906	Cluster-51324.122169	Cluster-51324.142205	Cluster-51324.151622	Cluster-51324.147261	Cluster-51324.93065	Cluster-51324.117288	Cluster-51324.126958	Cluster-51324.158792	Cluster-51324.82465		Cluster-51324.96025	Cluster-51324.144335	Cluster-51324.88824	Cluster-51324.77633	Cluster-51324.11034	Cluster-51324.82580	Cluster-51324.53534	Cluster-51324.65493
Cluster-51324.45322	Cluster-51324.36233	Cluster-51324.94815	Cluster-51324.143102	Cluster-51324.10923	Cluster-51324.95601	Cluster-51324.116440	Cluster-51324.74857	Cluster-51324.129301	Cluster-51324.95441		Cluster-51324.87173	Cluster-51324.51585	Cluster-51324.112263	Cluster-51324.64902	Cluster-51324.99994	Cluster-51324.57127	Cluster-51324.87343	Cluster-51324.79739
Cluster-51324.66771	Cluster-51324.100927	Cluster-51324.129350	Cluster-51324.42788	Cluster-51324.92267	Cluster-51324.140454	Cluster-51324.153682	Cluster-51324.111352	Cluster-51324.152278	Cluster-51324.59669		Cluster-51324.92293	Cluster-51324.98493	Cluster-51324.120597	Cluster-51324.102585	Cluster-51324.192277	Cluster-51324.108627	Cluster-51324.53595	Cluster-51324.77201
Cluster-51324.142639	Cluster-51324.144325	Cluster-51324.89019	Cluster-51324.76078	Cluster-51324.81454	Cluster-51324.65041	Cluster-51324.192782	Cluster-51324.89946	Cluster-51324.102180	Cluster-51324.123701		Cluster-51324.91103	Cluster-51324.50152	Cluster-51324.108165	Cluster-51324.88376	Cluster-51324.20014	Cluster-51324.88209	Cluster-51324.151951	Cluster-51324.144085
Cluster-51324.46323	Cluster-51324.46824	Cluster-51324.122309	Cluster-51324.148954	Cluster-51324.73583	Cluster-51324.111591	Cluster-51324.125787	Cluster-51324.96526	Cluster-51324.90874	Cluster-51324.91436		Cluster-51324.86798	Cluster-51324.143970	Cluster-51324.99055	Cluster-51324.134216	Cluster-51324.67647	Cluster-51324.85634	Cluster-51324.64937	Cluster-51324.53901
Cluster-51324.115781	Cluster-51324.55220	Cluster-51324.105922	Cluster-51324.183681	Cluster-51324.109130	Cluster-51324.73366	Cluster-51324.98697	Cluster-51324.82996	Cluster-51324.60807	Cluster-51324.100749		Cluster-51324.96793	Cluster-51324.176756	Cluster-51324.65241	Cluster-51324.68810	Cluster-51324.183966	Cluster-51324.85182	Cluster-51324.80941	Cluster-51324.121122
Cluster-51324.118353	Cluster-51324.55093	Cluster-51324.111625	Cluster-51324.66624	Cluster-51324.196725	Cluster-51324.101710	Cluster-51324.93791	Cluster-51324.136494	Cluster-51324.91558	Cluster-51324.117950		Cluster-51324.100807	Cluster-51324.68323	Cluster-51324.75843	Cluster-51324.159629	Cluster-51324.161593	Cluster-51324.88800	Cluster-51324.141185	Cluster-51324.115580
Cluster-51324.81584	Cluster-51324.107524	Cluster-51324.85575	Cluster-51324.54414	Cluster-51324.127433	Cluster-51324.34881	Cluster-51324.79949	Cluster-51324.54356	Cluster-51324.98656	Cluster-51324.145425		Cluster-51324.96417	Cluster-51324.70835	Cluster-51324.97727	Cluster-51324.111436		Cluster-51324.100956	Cluster-51324.140977	Cluster-51324.88463
Cluster-51324.156868	Cluster-51324.53103	Cluster-51324.63811	Cluster-51324.48346	Cluster-51324.59161	Cluster-51324.169510	Cluster-51324.72604	Cluster-51324.104109	Cluster-51324.95817	Cluster-51324.63705		Cluster-51324.90970	Cluster-51324.51121	Cluster-51324.115033	Cluster-51324.86593		Cluster-51324.95079	Cluster-51324.143659	Cluster-51324.66937
Cluster-51324.160408	Cluster-51324.81166	Cluster-51324.55210	Cluster-51324.118173	Cluster-51324.96910	Cluster-51324.117192	Cluster-51324.93646	Cluster-51324.112811	Cluster-51324.89593	Cluster-51324.147018		Cluster-51324.107807	Cluster-51324.149334	Cluster-51324.88280	Cluster-51324.87070		Cluster-51324.92120	Cluster-51324.48308	Cluster-51324.120530
Cluster-51324.103380	Cluster-51324.101428	Cluster-51324.76520	Cluster-51324.103191	Cluster-51324.10659	Cluster-51324.93072	Cluster-51324.97073	Cluster-51324.88233	Cluster-51324.88461	Cluster-51324.101447		Cluster-51324.95698	Cluster-51324.145372	Cluster-51324.100244	Cluster-51324.96165		Cluster-51324.89178	Cluster-51324.152082	Cluster-51324.106711
Cluster-51324.56957	Cluster-51324.145092	Cluster-51324.104873	Cluster-51324.52370	Cluster-51324.20736	Cluster-51324.111866	Cluster-51324.74399	Cluster-51324.75134	Cluster-51324.55596	Cluster-51324.94577		Cluster-51324.92650	Cluster-51324.164893	Cluster-51324.101230	Cluster-51324.93014		Cluster-51324.79838	Cluster-51324.95543	Cluster-51324.141112
Cluster-51324.85112	Cluster-51324.95316	Cluster-51324.85753	Cluster-51324.64156	Cluster-51324.93000	Cluster-51324.127807		Cluster-51324.87589	Cluster-51324.52298	Cluster-51324.108025		Cluster-51324.109258	Cluster-51324.57078	Cluster-51324.94910	Cluster-51324.121708		Cluster-51324.121793	Cluster-51324.143238	Cluster-51324.81403
Cluster-51324.48709	Cluster-51324.95911	Cluster-51324.93501	Cluster-51324.73529	Cluster-51324.97851	Cluster-51324.98008		Cluster-51324.127573	Cluster-51324.101091	Cluster-51324.90599		Cluster-51324.112731	Cluster-51324.36560	Cluster-51324.82853	Cluster-51324.79577		Cluster-51324.115556	Cluster-51324.87336	Cluster-51324.98331
Cluster-51324.126960	Cluster-51324.132825	Cluster-51324.91866	Cluster-51324.98721	Cluster-51324.74204	Cluster-51324.93661		Cluster-51324.121060	Cluster-51324.168061	Cluster-51324.66882		Cluster-51324.94971	Cluster-51324.50016	Cluster-51324.92383	Cluster-51324.117103		Cluster-51324.115551	Cluster-51324.143873	Cluster-51324.88990
Cluster-51324.64752	Cluster-51324.90659	Cluster-51324.157169	Cluster-51324.149324	Cluster-51324.112956	Cluster-51324.72061		Cluster-51324.81825	Cluster-51324.87566	Cluster-51324.69194		Cluster-51324.118394	Cluster-51324.90877	Cluster-51324.70562	Cluster-51324.138197		Cluster-51324.96460	Cluster-51324.62449	Cluster-51324.193940
Cluster-51324.89899	Cluster-51324.125144	Cluster-51324.73367	Cluster-51324.155112	Cluster-51324.109133	Cluster-51324.124001		Cluster-51324.128833	Cluster-51324.66909	Cluster-51324.71897		Cluster-51324.152575	Cluster-51324.141035	Cluster-51324.94321	Cluster-51324.79537		Cluster-51324.93917	Cluster-51324.50932	Cluster-51324.100668
Cluster-51324.106991	Cluster-51324.94817	Cluster-51324.106546	Cluster-51324.64111	Cluster-51324.48002	Cluster-51324.72062		Cluster-51324.75821	Cluster-51324.51589	Cluster-51324.113793		Cluster-51324.124710	Cluster-51324.51788	Cluster-51324.130624	Cluster-51324.102445		Cluster-51324.62564	Cluster-51324.110061	Cluster-51324.94131
Cluster-51324.87683	Cluster-51324.145977	Cluster-51324.87112	Cluster-51324.47958	Cluster-51324.110432	Cluster-51324.114554		Cluster-51324.109988	Cluster-51324.107241	Cluster-51324.165276		Cluster-51324.109582	Cluster-51324.139139	Cluster-51324.93785	Cluster-51324.119397		Cluster-51324.87105	Cluster-51324.133692	Cluster-51324.134399
Cluster-51324.94767	Cluster-51324.96416	Cluster-51324.101055	Cluster-51324.54416	Cluster-51324.10292	Cluster-51324.95400		Cluster-51324.93237	Cluster-51324.64158	Cluster-51324.20463		Cluster-51324.74770	Cluster-51324.16660	Cluster-51324.69700	Cluster-51324.77666		Cluster-51324.81564	Cluster-51324.158189	Cluster-51324.65604
Cluster-51324.120785	Cluster-51324.92218	Cluster-51324.50809	Cluster-51324.108895	Cluster-51324.62934	Cluster-51324.85652		Cluster-51324.123963	Cluster-51324.98383	Cluster-51324.94275		Cluster-51324.97255	Cluster-51324.52939	Cluster-51324.76654	Cluster-51324.107209		Cluster-51324.98733	Cluster-51324.143605	Cluster-51324.135918
Cluster-51324.78064	Cluster-51324.90796	Cluster-51324.121314	Cluster-51324.53730	Cluster-51324.11169	Cluster-51324.113887		Cluster-51324.94068	Cluster-51324.98916	Cluster-51324.83302		Cluster-51324.99410	Cluster-51324.84331	Cluster-51324.96436	Cluster-51324.144252		Cluster-51324.101998	Cluster-51324.95336	Cluster-51324.39895
Cluster-51324.152431	Cluster-51324.66785	Cluster-51324.100667	Cluster-51324.159036	Cluster-51324.75249	Cluster-51324.95873		Cluster-51324.99826	Cluster-51324.124601	Cluster-51324.50364		Cluster-51324.93148	Cluster-51324.141339	Cluster-51324.180139	Cluster-51324.102725		Cluster-51324.100284	Cluster-51324.142384	Cluster-51324.158821
Cluster-51324.70810	Cluster-51324.72715	Cluster-51324.165355	Cluster-51324.141331	Cluster-51324.191381	Cluster-51324.88396		Cluster-51324.40246	Cluster-51324.40382	Cluster-51324.70968		Cluster-51324.114495	Cluster-51324.28003	Cluster-51324.91251	Cluster-51324.88062		Cluster-51324.90843	Cluster-51324.52406	Cluster-51324.65505
Cluster-51324.68213	Cluster-51324.127532	Cluster-51324.100540	Cluster-51324.66627	Cluster-51324.197378	Cluster-51324.96741		Cluster-51324.41709	Cluster-51324.87307	Cluster-51324.146274		Cluster-51324.82183	Cluster-51324.37311	Cluster-51324.115212	Cluster-51324.89966		Cluster-51324.81565	Cluster-51324.68656	Cluster-51324.98777
Cluster-51324.94578	Cluster-51324.47714	Cluster-51324.83878	Cluster-51324.47817	Cluster-51324.33803	Cluster-51324.44916		Cluster-51324.93309	Cluster-51324.132420	Cluster-51324.84860		Cluster-51324.98622	Cluster-51324.78897	Cluster-51324.74210	Cluster-51324.83947			Cluster-51324.54174	Cluster-51324.90647
Cluster-51324.103880	Cluster-51324.68064	Cluster-51324.72727	Cluster-51324.56465	Cluster-51324.98109	Cluster-51324.93009		Cluster-51324.91720	Cluster-51324.73034	Cluster-51324.40237		Cluster-51324.94286	Cluster-51324.34677	Cluster-51324.93780	Cluster-51324.132392			Cluster-51324.49805	Cluster-51324.50901
Cluster-51324.105827	Cluster-51324.86075	Cluster-51324.116145	Cluster-51324.149102	Cluster-51324.136852	Cluster-51324.83427		Cluster-51324.105540	Cluster-51324.59643	Cluster-51324.91098		Cluster-51324.160485	Cluster-51324.143299	Cluster-51324.113026	Cluster-51324.97205			Cluster-51324.98887	Cluster-51324.96762
Cluster-51324.83477	Cluster-51324.142889	Cluster-51324.72041	Cluster-51324.54462	Cluster-51324.104909	Cluster-51324.103993		Cluster-51324.113112	Cluster-51324.97289	Cluster-51324.74515		Cluster-51324.82292	Cluster-51324.140932	Cluster-51324.83403	Cluster-51324.75168			Cluster-51324.54552	Cluster-51324.122745
Cluster-51324.99674	Cluster-51324.53009	Cluster-51324.120632	Cluster-51324.92592		Cluster-51324.123998		Cluster-51324.97530	Cluster-51324.101449	Cluster-51324.79538		Cluster-51324.97792	Cluster-51324.87233	Cluster-51324.93594	Cluster-51324.93379			Cluster-51324.53999	Cluster-51324.116563
Cluster-51324.98723	Cluster-51324.94545	Cluster-51324.105710	Cluster-51324.135551		Cluster-51324.93043		Cluster-51324.100899	Cluster-51324.95479	Cluster-51324.141075		Cluster-51324.90776	Cluster-51324.142525	Cluster-51324.89943	Cluster-51324.106678			Cluster-51324.142996	Cluster-51324.44468
Cluster-51324.109256	Cluster-51324.54610	Cluster-51324.129588	Cluster-51324.142345		Cluster-51324.101978		Cluster-51324.80186	Cluster-51324.59159	Cluster-51324.72144		Cluster-51324.100705	Cluster-51324.199263	Cluster-51324.86719	Cluster-51324.91019			Cluster-51324.54175	Cluster-51324.100250
Cluster-51324.79408	Cluster-51324.38467	Cluster-51324.68559	Cluster-51324.93404		Cluster-51324.89914		Cluster-51324.95305	Cluster-51324.158795	Cluster-51324.84288		Cluster-51324.89384	Cluster-51324.127711	Cluster-51324.23271	Cluster-51324.93727			Cluster-51324.144712	Cluster-51324.44705
Cluster-51324.52021	Cluster-51324.110759	Cluster-51324.118224	Cluster-51324.54072		Cluster-51324.96752		Cluster-51324.168459	Cluster-51324.104604	Cluster-51324.96048		Cluster-51324.86061	Cluster-51324.49222	Cluster-51324.101170	Cluster-51324.81386			Cluster-51324.54358	Cluster-51324.147601
Cluster-51324.102371	Cluster-51324.83963	Cluster-51324.81865	Cluster-51324.51717		Cluster-51324.180241		Cluster-51324.107819	Cluster-51324.146000	Cluster-51324.96230		Cluster-51324.94724	Cluster-51324.137362	Cluster-51324.96267	Cluster-51324.40976			Cluster-51324.50414	Cluster-51324.51283
Cluster-51324.141388	Cluster-51324.34324	Cluster-51324.104164	Cluster-51324.145969		Cluster-51324.86650		Cluster-51324.98001	Cluster-51324.79516	Cluster-51324.97222		Cluster-51324.86417	Cluster-51324.133128	Cluster-51324.80706	Cluster-51324.94442			Cluster-51324.149622	Cluster-51324.83881
Cluster-51324.89011	Cluster-51324.99120	Cluster-51324.87604	Cluster-51324.53016		Cluster-51324.79992		Cluster-51324.89787	Cluster-51324.108076	Cluster-51324.113591		Cluster-51324.79797	Cluster-51324.157146	Cluster-51324.84646	Cluster-51324.14066			Cluster-51324.152756	Cluster-51324.154889
Cluster-51324.113871	Cluster-51324.91892	Cluster-51324.57810	Cluster-51324.102591		Cluster-51324.130900		Cluster-51324.108313	Cluster-51324.77421	Cluster-51324.76865		Cluster-51324.108258	Cluster-51324.67150	Cluster-51324.97856	Cluster-51324.89879			Cluster-51324.145346	Cluster-51324.94751
Cluster-51324.93741	Cluster-51324.134949	Cluster-51324.96500	Cluster-51324.147343		Cluster-51324.128837		Cluster-51324.87305	Cluster-51324.156527	Cluster-51324.146272		Cluster-51324.114494	Cluster-51324.150264	Cluster-51324.88861	Cluster-51324.84311			Cluster-51324.51658	Cluster-51324.108728
Cluster-51324.99939	Cluster-51324.65868	Cluster-51324.122057	Cluster-51324.53253		Cluster-51324.77596		Cluster-51324.92220	Cluster-51324.105068	Cluster-51324.133018		Cluster-51324.100280	Cluster-51324.47966	Cluster-51324.82049	Cluster-51324.104524			Cluster-51324.133490	Cluster-51324.75595
Cluster-51324.100966	Cluster-51324.146701	Cluster-51324.155537	Cluster-51324.145970		Cluster-51324.19693		Cluster-51324.78277	Cluster-51324.101444	Cluster-51324.72239		Cluster-51324.89910	Cluster-51324.49448	Cluster-51324.88602	Cluster-51324.85588			Cluster-51324.93620	Cluster-51324.72840
Cluster-51324.100785	Cluster-51324.88357	Cluster-51324.65834	Cluster-51324.76393		Cluster-51324.115560		Cluster-51324.89684	Cluster-51324.143028	Cluster-51324.115637		Cluster-51324.89532	Cluster-51324.145861	Cluster-51324.132170	Cluster-51324.182389			Cluster-51324.105902	Cluster-51324.105597
Cluster-51324.3980	Cluster-51324.95714	Cluster-51324.80997	Cluster-51324.62582		Cluster-51324.77534		Cluster-51324.85008	Cluster-51324.101440	Cluster-51324.174046		Cluster-51324.107265	Cluster-51324.132086	Cluster-51324.85199	Cluster-51324.114560			Cluster-51324.53750	Cluster-51324.51522
Cluster-51324.123642	Cluster-51324.84717	Cluster-51324.59082	Cluster-51324.104260		Cluster-51324.112564		Cluster-51324.117409	Cluster-51324.91549	Cluster-51324.93333		Cluster-51324.98728	Cluster-51324.166310	Cluster-51324.99268	Cluster-51324.49642			Cluster-51324.71812	Cluster-51324.128230
Cluster-51324.54357	Cluster-51324.112433	Cluster-51324.95842	Cluster-51324.101037		Cluster-51324.84637		Cluster-51324.97098	Cluster-51324.36539	Cluster-51324.103338		Cluster-51324.125040	Cluster-51324.201814	Cluster-51324.95282	Cluster-51324.107627			Cluster-51324.77140	Cluster-51324.144051
Cluster-51324.96231	Cluster-51324.54234	Cluster-51324.99704	Cluster-51324.130733		Cluster-51324.118778		Cluster-51324.101239	Cluster-51324.141953	Cluster-51324.133016		Cluster-51324.104357	Cluster-51324.92354	Cluster-51324.99862	Cluster-51324.133463			Cluster-51324.151215	Cluster-51324.81390
Cluster-51324.95953	Cluster-51324.84265	Cluster-51324.112489	Cluster-51324.149251		Cluster-51324.86843		Cluster-51324.94427	Cluster-51324.97278	Cluster-51324.95451		Cluster-51324.88634	Cluster-51324.94522	Cluster-51324.43495	Cluster-51324.58029			Cluster-51324.163612	Cluster-51324.70199
Cluster-51324.97263	Cluster-51324.52031	Cluster-51324.74480	Cluster-51324.114939		Cluster-51324.96610		Cluster-51324.92697	Cluster-51324.105511	Cluster-51324.53338		Cluster-51324.108871	Cluster-51324.104622	Cluster-51324.96440	Cluster-51324.75615			Cluster-51668.0	Cluster-51324.99953
Cluster-51324.50906	Cluster-51324.86084	Cluster-51324.114274	Cluster-51324.154166		Cluster-51324.109117		Cluster-51324.76484	Cluster-51324.89471	Cluster-51324.53225		Cluster-51324.90083	Cluster-51324.67138	Cluster-51324.93777	Cluster-51324.83994			Cluster-51324.54350	Cluster-51324.110148
Cluster-51324.68993	Cluster-51324.83733	Cluster-51324.87420	Cluster-51324.148369		Cluster-51324.97043		Cluster-51324.156450	Cluster-51324.111152	Cluster-51324.98504		Cluster-51324.99193	Cluster-51324.69754	Cluster-51324.95222	Cluster-51324.89061			Cluster-51324.54006	Cluster-51324.96351
Cluster-51324.127128	Cluster-51324.98827	Cluster-51324.38438	Cluster-51324.145485		Cluster-51324.84474		Cluster-51324.126083	Cluster-51324.77420	Cluster-51324.122746		Cluster-51324.98252	Cluster-51324.144178	Cluster-51324.111220	Cluster-51324.73333			Cluster-51324.149089	Cluster-51324.144719
Cluster-51324.63300	Cluster-51324.155245	Cluster-51324.111024	Cluster-51324.81926		Cluster-51324.91106		Cluster-51324.104757	Cluster-51324.72440	Cluster-51324.90308		Cluster-51324.151594	Cluster-51324.62788	Cluster-51324.87970	Cluster-51324.114214				Cluster-51324.57010
Cluster-51324.65452	Cluster-51324.95188	Cluster-51324.101047	Cluster-51324.142342		Cluster-51324.179541		Cluster-51324.90851	Cluster-51324.102456	Cluster-51324.87261		Cluster-51324.73831	Cluster-51324.86483	Cluster-51324.104456	Cluster-51324.64073				Cluster-51324.81243
Cluster-51324.98892	Cluster-51324.169670	Cluster-51324.100607	Cluster-51324.104083		Cluster-51324.92636		Cluster-51324.97946	Cluster-51324.82081	Cluster-51324.90320		Cluster-51324.195141	Cluster-51324.52366	Cluster-51324.97261	Cluster-51324.120777				Cluster-51324.65451
Cluster-51324.90356	Cluster-51324.101657	Cluster-51324.101304	Cluster-51324.142023		Cluster-51324.90499		Cluster-51324.119660	Cluster-51324.128907	Cluster-51324.144010		Cluster-51324.94220	Cluster-51324.30920	Cluster-51324.94526	Cluster-51324.78697				Cluster-51324.112360
Cluster-51324.92266	Cluster-51324.114788	Cluster-51324.88989	Cluster-51324.64926		Cluster-51324.91691		Cluster-51324.116911	Cluster-51324.99447	Cluster-51324.63977		Cluster-51324.95897	Cluster-51324.146719	Cluster-51324.82670	Cluster-51324.81947				Cluster-51324.130139
Cluster-51324.38916	Cluster-51324.53104	Cluster-51324.96161	Cluster-51324.46308		Cluster-51324.85786		Cluster-51324.89003	Cluster-51324.34241	Cluster-51324.154648		Cluster-51324.128079	Cluster-51324.144089	Cluster-51324.64195	Cluster-51324.87421				Cluster-51324.67998
Cluster-51324.88064	Cluster-51324.141531	Cluster-51324.124911	Cluster-51324.47418		Cluster-51324.95898		Cluster-51324.91761	Cluster-51324.85899	Cluster-51324.129197		Cluster-51324.97932	Cluster-51324.59008	Cluster-51324.76441	Cluster-51324.88176				Cluster-51324.56293
Cluster-51324.95699	Cluster-51324.114787	Cluster-51324.143160	Cluster-51324.177623		Cluster-51324.74184		Cluster-51324.63771	Cluster-51324.98922	Cluster-51324.120796		Cluster-51324.41200	Cluster-51324.37412	Cluster-51324.62116	Cluster-51324.115938				Cluster-51324.125083
Cluster-51324.96208	Cluster-51324.89867	Cluster-51324.115969	Cluster-51324.140975		Cluster-51324.111421		Cluster-51324.122372	Cluster-51324.95258	Cluster-51324.149372		Cluster-51324.78322	Cluster-51324.142690	Cluster-51324.88832	Cluster-51324.135335				Cluster-51324.110710
Cluster-51324.101930	Cluster-51324.88847	Cluster-51324.95052	Cluster-51324.149672		Cluster-51324.93088		Cluster-51324.101408	Cluster-51324.97306	Cluster-51324.138028		Cluster-51324.140903	Cluster-51324.48519	Cluster-51324.106465	Cluster-51324.96380				Cluster-51324.92648
Cluster-51324.51887	Cluster-51324.92155	Cluster-51324.118498	Cluster-51324.43883		Cluster-51324.96989		Cluster-51324.85587	Cluster-51324.106960	Cluster-51324.110448		Cluster-51324.91687	Cluster-51324.80098	Cluster-51324.87982	Cluster-51324.34656				Cluster-51324.155346
Cluster-51324.66643	Cluster-51324.52304	Cluster-51324.201544	Cluster-51324.141168		Cluster-51324.89504		Cluster-51324.89707	Cluster-51324.107276	Cluster-51324.112472		Cluster-51324.83088	Cluster-51324.6938	Cluster-51324.115674	Cluster-51324.125203				Cluster-51324.167776
Cluster-51324.101606	Cluster-51324.101580	Cluster-51324.150667	Cluster-51324.166732		Cluster-51324.109480		Cluster-51324.176402	Cluster-51324.101089	Cluster-51324.128015		Cluster-51324.93247	Cluster-51324.151516	Cluster-51324.76778	Cluster-51324.101753				Cluster-51324.97967
Cluster-51324.103750	Cluster-51324.142328	Cluster-51324.101120	Cluster-51324.86318		Cluster-51324.124000		Cluster-51324.108104	Cluster-51324.109131	Cluster-51324.131343		Cluster-51324.69282	Cluster-51324.148577	Cluster-51324.96571	Cluster-51324.106216				Cluster-51324.98707
Cluster-51324.103782	Cluster-51324.52305	Cluster-51324.53130	Cluster-51324.152862		Cluster-51324.175771		Cluster-51324.99209	Cluster-51324.101275	Cluster-51324.190018		Cluster-51324.128189	Cluster-51324.147022	Cluster-51324.98446	Cluster-51324.111738				Cluster-51324.150090
Cluster-51324.113206	Cluster-51324.90357	Cluster-51324.148875	Cluster-51324.114682		Cluster-51324.95966		Cluster-51324.124278	Cluster-51324.98907	Cluster-51324.98563		Cluster-51324.84910	Cluster-51324.46522	Cluster-51324.142907	Cluster-51324.29250				Cluster-51324.84234
Cluster-51324.77293	Cluster-51324.105754	Cluster-51324.99379	Cluster-51324.67963		Cluster-51324.115245		Cluster-51324.123882	Cluster-51324.100829	Cluster-51324.134612		Cluster-51324.110062	Cluster-51324.49915	Cluster-51324.58123	Cluster-51324.95917				Cluster-51324.115747
Cluster-51324.97101	Cluster-51324.107473	Cluster-51324.156352	Cluster-51324.111029		Cluster-51324.93264		Cluster-51324.88423	Cluster-51324.78753	Cluster-51324.86898		Cluster-51324.90288	Cluster-51324.141466	Cluster-51324.91030	Cluster-51324.109996				Cluster-51324.132389
Cluster-51324.78116	Cluster-51324.131262	Cluster-51324.96270	Cluster-51324.95773		Cluster-51324.111062		Cluster-51324.71312	Cluster-51324.88900	Cluster-51324.126629		Cluster-51324.99567	Cluster-51324.149521	Cluster-51324.112793	Cluster-51324.71869				Cluster-51324.92402
Cluster-51324.30051	Cluster-51324.127529	Cluster-51324.149898	Cluster-51324.93280		Cluster-51324.95684		Cluster-51324.69298	Cluster-51324.70013	Cluster-51324.156899		Cluster-51324.81181	Cluster-51324.95421	Cluster-51324.180756	Cluster-51324.53880				Cluster-51324.114037
Cluster-51324.52402	Cluster-51324.152965	Cluster-51324.118186	Cluster-51324.160132		Cluster-51324.92201		Cluster-51324.90133	Cluster-51324.127929	Cluster-51324.78314		Cluster-51324.105665	Cluster-51324.85279	Cluster-51324.108126	Cluster-51324.48688				Cluster-51324.91993
Cluster-51324.69016	Cluster-51324.89866	Cluster-51324.103443	Cluster-51324.145364		Cluster-51324.107404		Cluster-51324.103900	Cluster-51324.116225	Cluster-51324.109612		Cluster-51324.67139	Cluster-51324.140872	Cluster-51324.94994	Cluster-51324.111030				Cluster-51324.48101
Cluster-51324.143190	Cluster-51324.121651	Cluster-51324.161168	Cluster-51324.62642		Cluster-51324.110863		Cluster-51324.84672	Cluster-51324.89805	Cluster-51324.45554		Cluster-51324.74402	Cluster-51324.143660	Cluster-51324.144146	Cluster-51324.109974				Cluster-51324.98112
Cluster-51324.58276	Cluster-51324.93651	Cluster-51324.82736	Cluster-51324.50521		Cluster-51324.66537		Cluster-51324.107985	Cluster-51324.42268	Cluster-51324.54433		Cluster-51324.85647	Cluster-51324.143391	Cluster-51324.86457	Cluster-51324.95072				Cluster-51324.145427
Cluster-51324.114779	Cluster-51324.118640	Cluster-51324.132279	Cluster-51324.141393		Cluster-51324.95676		Cluster-51324.129831	Cluster-51324.71808	Cluster-51324.79987		Cluster-51324.82065	Cluster-51324.152633	Cluster-51324.117695	Cluster-51324.132789				Cluster-51324.103844
Cluster-51324.95384	Cluster-51324.81526	Cluster-51324.120638	Cluster-51324.54412		Cluster-51324.117676		Cluster-51324.80798	Cluster-51324.91853	Cluster-51324.76863		Cluster-51324.81771	Cluster-51324.154669	Cluster-51324.107734	Cluster-51324.106844				Cluster-51324.132839
Cluster-51324.95483	Cluster-51324.132827	Cluster-51324.59530	Cluster-51324.155113		Cluster-51324.117984		Cluster-51324.121758	Cluster-51324.82700	Cluster-51324.63180		Cluster-51324.74863	Cluster-51324.156921	Cluster-51324.105811	Cluster-51324.69371				Cluster-51324.97714
Cluster-51324.102703	Cluster-51324.95710	Cluster-51324.151034	Cluster-51324.146702		Cluster-51324.94834		Cluster-51324.123493	Cluster-51324.155039	Cluster-51324.133046		Cluster-51324.102971	Cluster-51324.46798	Cluster-51324.97299	Cluster-51324.141360				Cluster-51324.74920
Cluster-51324.112271	Cluster-51324.82712	Cluster-51324.84593	Cluster-51324.36172		Cluster-51324.81746		Cluster-51324.68224	Cluster-51324.97820	Cluster-51324.102993		Cluster-51324.109212	Cluster-51324.51920	Cluster-51324.92701	Cluster-51324.100330				Cluster-51324.168341
Cluster-51324.155444	Cluster-51324.87094	Cluster-51324.95415	Cluster-51324.158723		Cluster-51324.87045		Cluster-51324.102842	Cluster-51324.70532	Cluster-51324.160782		Cluster-51324.80237	Cluster-51324.161169	Cluster-51324.115464	Cluster-51324.115975				Cluster-51324.100411
Cluster-51324.81484	Cluster-51324.52308	Cluster-51324.136982	Cluster-51324.88084		Cluster-51324.92929		Cluster-51324.84418	Cluster-51324.88371	Cluster-51324.108062		Cluster-51324.95763	Cluster-51324.98868	Cluster-51324.110644	Cluster-51324.87675				Cluster-51324.74827
Cluster-51324.126203	Cluster-51324.45782	Cluster-51324.113253	Cluster-51324.86926		Cluster-51324.84454		Cluster-51324.87416	Cluster-51324.95125	Cluster-51324.99381		Cluster-51324.106903	Cluster-51324.107799	Cluster-51324.98722	Cluster-51324.109268				Cluster-51324.145373
Cluster-51324.7259	Cluster-51324.164655	Cluster-51324.52856	Cluster-51324.65319		Cluster-51324.180695		Cluster-51324.92103	Cluster-51324.87734	Cluster-51324.88767		Cluster-51324.95689	Cluster-51324.44040	Cluster-51324.140147	Cluster-51324.97899				Cluster-51324.76187
Cluster-51324.102768	Cluster-51324.103274	Cluster-51324.81296	Cluster-51324.150821		Cluster-51324.19771		Cluster-51324.75856	Cluster-51324.82690	Cluster-51324.92109		Cluster-51324.94644	Cluster-51324.149522	Cluster-51324.42342	Cluster-51324.91829				Cluster-51324.84117
Cluster-51324.76394	Cluster-51324.89863	Cluster-51324.131031	Cluster-51324.144653		Cluster-51324.106016		Cluster-51324.85439	Cluster-51324.94359	Cluster-51324.45512		Cluster-51324.94858	Cluster-51324.97020	Cluster-51324.92202	Cluster-51324.54124				Cluster-51324.63474
Cluster-51324.78567	Cluster-51324.106970	Cluster-51324.51703	Cluster-51324.112275		Cluster-51324.118315		Cluster-51324.86888	Cluster-51324.104317	Cluster-51324.155767		Cluster-51324.106552	Cluster-51324.84269	Cluster-51324.102730	Cluster-51324.80954				Cluster-51324.64689
Cluster-51324.99486	Cluster-51324.101303	Cluster-51324.109706	Cluster-51324.135410		Cluster-51324.92272		Cluster-51324.91626	Cluster-51324.77252	Cluster-51324.108721		Cluster-51324.86876	Cluster-51324.142346	Cluster-51324.96289	Cluster-51324.29979				Cluster-51324.19528
Cluster-51324.91661	Cluster-51324.104204	Cluster-51324.117057	Cluster-51324.54500		Cluster-51324.96724		Cluster-51324.95008	Cluster-51324.94870	Cluster-51324.46699		Cluster-51324.130238	Cluster-51324.102732	Cluster-51324.98023	Cluster-51324.119664				Cluster-51324.138901
Cluster-51324.53255	Cluster-51324.94453	Cluster-51324.51151	Cluster-51324.115893		Cluster-51324.96392		Cluster-51324.116959	Cluster-51324.102451	Cluster-51324.66256		Cluster-51324.84376	Cluster-51324.144652	Cluster-51324.94203	Cluster-51324.123511				Cluster-51324.76303
Cluster-51324.110418	Cluster-51324.72719	Cluster-51324.160736	Cluster-51324.104084		Cluster-51324.54366		Cluster-51324.96399	Cluster-51324.103644	Cluster-51324.74833		Cluster-51324.90908	Cluster-51324.104077	Cluster-51324.93995	Cluster-51324.97510				Cluster-51324.115639
Cluster-51324.110206	Cluster-51324.147783	Cluster-51324.193900	Cluster-51324.148567		Cluster-51324.119968		Cluster-51324.100717	Cluster-51324.127322	Cluster-51324.50139		Cluster-51324.125270	Cluster-51324.40546	Cluster-51324.102331	Cluster-51324.100191				Cluster-51324.62182
Cluster-51324.98185	Cluster-51324.92159	Cluster-51324.104174	Cluster-51324.52215		Cluster-51324.76897		Cluster-51324.72498	Cluster-51324.182992	Cluster-51324.108026		Cluster-51324.98979	Cluster-51324.151393	Cluster-51324.78778	Cluster-51324.108353				Cluster-51324.124244
Cluster-51324.72287	Cluster-51324.98679	Cluster-51324.116578	Cluster-51324.41584		Cluster-51324.86860		Cluster-51324.110251	Cluster-51324.103304	Cluster-51324.42672		Cluster-51324.87390	Cluster-51324.95961	Cluster-51324.100425	Cluster-51324.77238				Cluster-51324.92324
Cluster-51324.84140	Cluster-51324.109463	Cluster-51324.116882	Cluster-51324.110109		Cluster-51324.92076		Cluster-51324.50253	Cluster-51324.100969	Cluster-51324.120829		Cluster-51324.133174	Cluster-51324.179765	Cluster-51324.83111	Cluster-51324.54129				Cluster-51324.50802
Cluster-51324.107676	Cluster-51324.51055	Cluster-51324.113274	Cluster-51324.101137		Cluster-51324.97478		Cluster-51324.83440	Cluster-51324.90873	Cluster-51324.174224		Cluster-51324.100112	Cluster-51324.152287	Cluster-51324.105454	Cluster-51324.74487				Cluster-51324.62555
Cluster-51324.87682	Cluster-51324.97823	Cluster-51324.34856	Cluster-51324.108170		Cluster-51324.93964		Cluster-51324.74416	Cluster-51324.87733	Cluster-51324.27862		Cluster-51324.96572	Cluster-51324.24303	Cluster-51324.83408	Cluster-51324.62427				Cluster-51324.138036
Cluster-51324.73829	Cluster-51324.83796	Cluster-51324.86882	Cluster-51324.104220		Cluster-51324.86581		Cluster-51324.136219	Cluster-51324.67682	Cluster-51324.82776		Cluster-51324.93193	Cluster-51324.49196	Cluster-51324.27781	Cluster-51324.48334				Cluster-51324.100458
Cluster-51324.90014	Cluster-51324.117742	Cluster-51324.74377	Cluster-51324.100604		Cluster-51324.93069		Cluster-51324.84350	Cluster-51324.73584	Cluster-51324.77294		Cluster-51324.104151	Cluster-51324.36114	Cluster-51324.107308	Cluster-51324.70512				Cluster-51324.85149
Cluster-51324.49616	Cluster-51324.34696	Cluster-51324.108372	Cluster-51324.82732		Cluster-51324.106509		Cluster-51324.63643	Cluster-51324.98121	Cluster-51324.57933		Cluster-51324.75598	Cluster-51324.84683	Cluster-51324.96171	Cluster-51324.93952				Cluster-51324.92586
Cluster-51324.114020	Cluster-51324.83073	Cluster-51324.103726	Cluster-51324.143519		Cluster-51324.121454		Cluster-51324.88759	Cluster-51324.117295	Cluster-51324.129832		Cluster-51324.93907	Cluster-51324.102115	Cluster-51324.99130	Cluster-51324.112570				Cluster-51324.75082
Cluster-51324.131961	Cluster-51324.94360	Cluster-51324.74306	Cluster-51324.66623		Cluster-51324.107747		Cluster-51324.95385	Cluster-51324.77423	Cluster-51324.126408		Cluster-51324.104993	Cluster-51324.148953	Cluster-51324.103134	Cluster-51324.51064				Cluster-51324.108843
Cluster-51324.63037	Cluster-51324.90845	Cluster-51324.80715	Cluster-51324.145363		Cluster-51324.98029		Cluster-51324.42316	Cluster-51324.125784	Cluster-51324.155369		Cluster-51324.94329	Cluster-51324.124652	Cluster-51324.89352	Cluster-51324.91313				Cluster-51324.132773
Cluster-51324.101443	Cluster-51324.86073	Cluster-51324.105778	Cluster-51324.112276		Cluster-51324.86850		Cluster-51324.110604	Cluster-51324.161407	Cluster-51324.99377		Cluster-51324.56703	Cluster-51324.149103	Cluster-51324.98640	Cluster-51324.76370				Cluster-51324.84062
Cluster-51324.123926	Cluster-51324.53873	Cluster-51324.44815	Cluster-51324.52625		Cluster-51324.115873		Cluster-51324.97678	Cluster-51324.58874	Cluster-51324.118735		Cluster-51324.78621	Cluster-51324.90049	Cluster-51324.94351	Cluster-51324.97606				Cluster-51324.87338
Cluster-51324.30910	Cluster-51324.141742	Cluster-51324.103746	Cluster-51324.89140		Cluster-51324.81462		Cluster-51324.101800	Cluster-51324.117299	Cluster-51324.85455		Cluster-51324.91680	Cluster-51324.166974	Cluster-51324.73565	Cluster-51324.101406				Cluster-51324.47653
Cluster-51324.103723	Cluster-51324.82084	Cluster-51324.128528	Cluster-51324.141341		Cluster-51324.62558		Cluster-51324.85649	Cluster-51324.96139	Cluster-51324.54528		Cluster-51324.106952	Cluster-51324.104958	Cluster-51324.99038	Cluster-51324.113747				Cluster-51324.93906
Cluster-51324.88997	Cluster-51324.65863	Cluster-51324.99215	Cluster-51324.110128		Cluster-51324.104141		Cluster-51324.80654	Cluster-51324.129298	Cluster-51324.43733		Cluster-51324.119115	Cluster-51324.98696	Cluster-51324.108203	Cluster-51324.124331				Cluster-51324.98371
Cluster-51324.97872	Cluster-51324.68347	Cluster-51324.101264	Cluster-51324.39953		Cluster-51324.92517		Cluster-51324.122885	Cluster-51324.94829	Cluster-51324.90275		Cluster-51324.76376	Cluster-51324.112241	Cluster-51324.94703	Cluster-51324.105218				Cluster-51324.40673
Cluster-51324.129813	Cluster-51324.45452	Cluster-51324.204086	Cluster-51324.130561		Cluster-51324.60747		Cluster-51324.112254	Cluster-51324.58872	Cluster-51324.79260		Cluster-51324.100633	Cluster-51324.54446	Cluster-51324.94734	Cluster-51324.97431				Cluster-51324.86703
Cluster-51324.124782	Cluster-51324.100926	Cluster-51324.4859	Cluster-51324.157156		Cluster-51324.102795		Cluster-51324.112530	Cluster-51324.138980	Cluster-51324.78125		Cluster-51324.106223	Cluster-51324.155114	Cluster-51324.90207	Cluster-51324.168560				Cluster-51324.84031
Cluster-51324.114601	Cluster-51324.44923	Cluster-51324.69774	Cluster-51324.99192		Cluster-51324.89495		Cluster-51324.94498	Cluster-51324.48531	Cluster-51324.146419		Cluster-51324.77684	Cluster-51324.152707	Cluster-51324.107145	Cluster-51324.82751				Cluster-51324.92825
Cluster-51324.94746	Cluster-51324.46508	Cluster-51324.111398	Cluster-51324.143835		Cluster-51324.184515		Cluster-51324.99194		Cluster-51324.181600		Cluster-51324.93416	Cluster-51324.149288	Cluster-51324.142179	Cluster-51324.90667				Cluster-51324.120266
Cluster-51324.193893	Cluster-51324.90352	Cluster-51324.138164	Cluster-51324.144912		Cluster-51324.86846		Cluster-51324.84479		Cluster-51324.81419		Cluster-51324.81071	Cluster-51324.43168	Cluster-51324.118024	Cluster-51324.73684				Cluster-51324.146603
Cluster-51324.93325	Cluster-51324.152368	Cluster-51324.113654	Cluster-51324.121532		Cluster-51324.100938		Cluster-51324.69299		Cluster-51324.93336		Cluster-51324.107393	Cluster-51324.31571	Cluster-51324.89884	Cluster-51324.82091				Cluster-51324.84074
Cluster-51324.48773	Cluster-51324.162783	Cluster-51324.68101	Cluster-51324.115434		Cluster-51324.76889		Cluster-51324.154607		Cluster-51324.120134		Cluster-51324.85238	Cluster-51324.96042	Cluster-51324.131218	Cluster-51324.110421				Cluster-51324.93412
Cluster-51324.103748	Cluster-51324.110000	Cluster-51324.79834	Cluster-51324.104085		Cluster-51324.130901		Cluster-51324.115735		Cluster-51324.142767		Cluster-51324.104691	Cluster-51324.104866	Cluster-51324.126191	Cluster-51324.77002				Cluster-51324.108300
Cluster-51324.94176	Cluster-51324.125034	Cluster-51324.186667	Cluster-51324.123654		Cluster-51324.95868		Cluster-51324.180361		Cluster-51324.112781		Cluster-51324.97567	Cluster-51324.49041	Cluster-51324.146630	Cluster-51324.115025				Cluster-51324.106059
Cluster-51324.80857	Cluster-51324.98233	Cluster-51324.105532	Cluster-51324.52214		Cluster-51324.89112		Cluster-51324.120424		Cluster-51324.160872		Cluster-51324.101545	Cluster-51324.48786	Cluster-51324.53641	Cluster-51324.63294				Cluster-51324.99452
Cluster-51324.101829	Cluster-51324.92240	Cluster-51324.84592	Cluster-51324.53148		Cluster-51324.141223		Cluster-51324.95700		Cluster-51324.101849		Cluster-51324.95737	Cluster-51324.93730	Cluster-51324.93283	Cluster-51324.84954				Cluster-51324.64063
Cluster-51324.93257	Cluster-51324.153636	Cluster-51324.112255	Cluster-51324.54553		Cluster-51324.94587		Cluster-51324.128009		Cluster-51324.44515		Cluster-51324.75181	Cluster-51324.51052	Cluster-51324.89676	Cluster-51324.94416				Cluster-51324.93360
Cluster-51324.134864	Cluster-51324.100624	Cluster-51324.123713	Cluster-51324.150615		Cluster-51324.91210		Cluster-51324.96401		Cluster-51324.113134		Cluster-51324.92329	Cluster-51324.161527	Cluster-51324.97979	Cluster-51324.106780				Cluster-51324.91609
Cluster-51324.132764	Cluster-51324.131347	Cluster-51324.106344	Cluster-51324.141046		Cluster-51324.91209		Cluster-51324.48042		Cluster-51324.144568		Cluster-51324.99218	Cluster-51324.141394	Cluster-51324.97169	Cluster-51324.87702				Cluster-51324.137892
Cluster-51324.121530	Cluster-51324.131518	Cluster-51324.116021	Cluster-51324.115440		Cluster-51324.92161		Cluster-51324.35944		Cluster-51324.67188		Cluster-51324.71644	Cluster-51324.43789	Cluster-51324.91172	Cluster-51324.115881				Cluster-51324.173460
Cluster-51324.90494	Cluster-51324.121656	Cluster-51324.95369	Cluster-51324.43885		Cluster-51324.183387		Cluster-51324.110829		Cluster-51324.133208		Cluster-51324.99327	Cluster-51324.58289	Cluster-51324.86231	Cluster-51324.157641				Cluster-51324.47766
Cluster-51324.114066	Cluster-51324.41116	Cluster-51324.96522	Cluster-51324.154780		Cluster-51324.71767		Cluster-51324.94555		Cluster-51324.81381		Cluster-51324.96418	Cluster-51324.93391	Cluster-51324.135336	Cluster-51324.95871				Cluster-51324.59540
Cluster-51324.56995	Cluster-51324.89864	Cluster-51324.121983	Cluster-51324.142075		Cluster-51324.86838		Cluster-51324.104996		Cluster-51324.49719		Cluster-51324.84971	Cluster-51324.157313	Cluster-51324.86570	Cluster-51324.71809				Cluster-51324.86968
Cluster-51324.86868	Cluster-51324.54538	Cluster-51324.94013	Cluster-51324.119451		Cluster-51324.97649		Cluster-51324.71735		Cluster-51324.145614		Cluster-51324.101963	Cluster-51324.95492	Cluster-51324.96785	Cluster-51324.142263				Cluster-51324.45979
Cluster-51324.92961	Cluster-51324.87550	Cluster-51324.82148	Cluster-51324.64927		Cluster-51324.90278		Cluster-51324.87029		Cluster-51324.109003		Cluster-51324.98675	Cluster-51324.44053	Cluster-51324.94761	Cluster-51324.77472				Cluster-51324.69534
Cluster-51324.97201	Cluster-51324.101299	Cluster-51324.117239	Cluster-51324.140985		Cluster-51324.98182		Cluster-51324.141534		Cluster-51324.68292		Cluster-51324.126353	Cluster-51324.46981	Cluster-51324.97021	Cluster-51324.154422				Cluster-51324.89568
Cluster-51324.44719	Cluster-51324.163656	Cluster-51324.87062	Cluster-51324.89804		Cluster-51324.118314		Cluster-51324.48178		Cluster-51324.98364		Cluster-51324.92716	Cluster-51324.143150	Cluster-51324.87005	Cluster-51324.119124				Cluster-51324.101530
Cluster-51324.98491	Cluster-51324.119884	Cluster-51324.179730	Cluster-51324.84438		Cluster-51324.93157		Cluster-51324.115039		Cluster-51324.127946		Cluster-51324.90758	Cluster-51324.47620	Cluster-51324.72854	Cluster-51324.139315				Cluster-51324.129657
Cluster-51324.16615	Cluster-51324.86068	Cluster-51324.74071	Cluster-51324.133857		Cluster-51324.76595		Cluster-51324.75921		Cluster-51324.86699		Cluster-51324.100116	Cluster-51324.149196	Cluster-51324.81453	Cluster-51324.167636				Cluster-51324.72770
Cluster-51324.93543	Cluster-51324.49680	Cluster-51324.96940	Cluster-51324.135555		Cluster-51324.77675		Cluster-51324.97991		Cluster-51324.103580		Cluster-51324.102609	Cluster-51324.95174	Cluster-51324.121004	Cluster-51324.78271				Cluster-51324.102335
Cluster-51324.94316	Cluster-51324.70444	Cluster-51324.88065	Cluster-51324.148134		Cluster-51324.77676		Cluster-51324.127955		Cluster-51324.153111		Cluster-51324.135419	Cluster-51324.56993	Cluster-51324.31953	Cluster-51324.80368				Cluster-51324.53991
Cluster-51324.63234	Cluster-51324.31856	Cluster-51324.138078	Cluster-51324.47584		Cluster-51324.82667		Cluster-51324.83734		Cluster-51324.111043		Cluster-51324.88910	Cluster-51324.91540	Cluster-51324.96517	Cluster-51324.54470				Cluster-51324.153356
Cluster-51324.201998	Cluster-51324.62824	Cluster-51324.132600	Cluster-51324.91500		Cluster-51324.93631		Cluster-51324.115041		Cluster-51324.90161		Cluster-51324.89641	Cluster-51324.157533	Cluster-51324.93627	Cluster-51324.109038				Cluster-51324.115748
Cluster-51324.68924	Cluster-51324.104906	Cluster-51324.80953	Cluster-51324.144547		Cluster-51324.104812		Cluster-51324.92185		Cluster-51324.151645		Cluster-51324.95389	Cluster-51324.64071	Cluster-51324.109765	Cluster-51324.141771				Cluster-51324.134049
Cluster-51324.118421	Cluster-51324.60495	Cluster-51324.111155	Cluster-51324.141045		Cluster-51324.93039		Cluster-51324.92965		Cluster-51324.95392		Cluster-51324.88038	Cluster-51324.140917	Cluster-51324.79510	Cluster-51324.71831				Cluster-51324.158308
Cluster-51324.82903	Cluster-51324.85939	Cluster-51324.140428	Cluster-51324.40362		Cluster-51324.91701		Cluster-51324.104824		Cluster-51324.75501		Cluster-51324.102373	Cluster-51324.166891	Cluster-51324.84405	Cluster-51324.161247				Cluster-51324.81879
Cluster-51324.63383	Cluster-51324.47959	Cluster-51324.91170	Cluster-51324.151592		Cluster-51324.84786		Cluster-51324.84559		Cluster-51324.131402		Cluster-51324.98787	Cluster-51324.37413	Cluster-51324.99069	Cluster-51324.79886				Cluster-51324.175099
Cluster-51324.94537	Cluster-51324.117681	Cluster-51324.45210	Cluster-51324.121522		Cluster-51324.91399		Cluster-51324.55925		Cluster-51324.111406		Cluster-51324.62992	Cluster-51324.155678	Cluster-51324.92690	Cluster-51324.96661				Cluster-51324.111605
Cluster-51324.130619	Cluster-51324.159766	Cluster-51324.121795	Cluster-51324.86481		Cluster-51324.92749		Cluster-51324.112828		Cluster-51324.36777		Cluster-51324.113058	Cluster-51324.47968	Cluster-51324.94668	Cluster-51324.98648				Cluster-51324.96039
Cluster-51324.93164	Cluster-51324.49984	Cluster-51324.85012	Cluster-51324.135550		Cluster-51324.84522		Cluster-51324.55926		Cluster-51324.68289		Cluster-51324.126659	Cluster-51324.98006	Cluster-51324.105217	Cluster-51324.93809				Cluster-51324.82482
Cluster-51324.85101	Cluster-51324.92162	Cluster-51324.97798	Cluster-51324.52691		Cluster-51324.94020		Cluster-51324.27193		Cluster-51324.116874		Cluster-51324.91527	Cluster-51324.46365	Cluster-51324.98196	Cluster-51324.61433				Cluster-51324.58618
Cluster-51324.99356	Cluster-51324.83799	Cluster-51324.123820	Cluster-51324.42188		Cluster-51324.123999		Cluster-51324.54990		Cluster-51324.144285		Cluster-51324.49049	Cluster-51324.50076	Cluster-51324.36833	Cluster-51324.73979				Cluster-51324.141912
Cluster-51324.38109	Cluster-51324.95422	Cluster-51324.12084	Cluster-51324.85489		Cluster-51324.76887		Cluster-51324.107267		Cluster-51324.131261		Cluster-51324.92270	Cluster-51324.141276	Cluster-51324.95724	Cluster-51324.84698				Cluster-51324.90075
Cluster-51324.201122	Cluster-51324.53105	Cluster-51324.80141	Cluster-51324.144331		Cluster-51324.93067		Cluster-51324.123293		Cluster-51324.42632		Cluster-51324.79275	Cluster-51324.18332	Cluster-51324.96189	Cluster-51324.97627				Cluster-51324.147292
Cluster-51324.105607	Cluster-51324.160709	Cluster-51324.105745	Cluster-51324.118401		Cluster-51324.91767		Cluster-51324.92922		Cluster-51324.59581		Cluster-51324.112565	Cluster-51324.150929	Cluster-51324.93056	Cluster-51324.136774				Cluster-51324.83719
Cluster-51324.64767	Cluster-51324.64436	Cluster-51324.138947	Cluster-51324.67145		Cluster-51324.91945		Cluster-51324.69583		Cluster-51324.63003		Cluster-51324.147794	Cluster-51324.164985	Cluster-51324.95300	Cluster-51324.69800				Cluster-51324.45641
Cluster-51324.86420	Cluster-51324.91389	Cluster-51324.72763	Cluster-51324.94490		Cluster-51324.96851		Cluster-51324.97598		Cluster-51324.56420		Cluster-51324.96781	Cluster-51324.51921	Cluster-51324.67804	Cluster-51324.74982				Cluster-51324.87537
Cluster-51324.89009	Cluster-51324.152409	Cluster-51324.96990	Cluster-51324.141098		Cluster-51324.102440		Cluster-51324.94539		Cluster-51324.65395		Cluster-51324.100553	Cluster-51324.125573	Cluster-51324.66241	Cluster-51324.157681				Cluster-51324.50187
Cluster-51324.151231	Cluster-51324.90377	Cluster-51324.71285	Cluster-51324.145142		Cluster-51324.93071		Cluster-51324.122010		Cluster-51324.120891		Cluster-51324.31290	Cluster-51324.75791	Cluster-51324.94990	Cluster-51324.102221				Cluster-51324.80256
Cluster-51324.25855	Cluster-51324.100324	Cluster-51324.140558	Cluster-51324.166733		Cluster-51324.77257		Cluster-51324.101755		Cluster-51324.78752		Cluster-51324.109510	Cluster-51324.144118	Cluster-51324.76917	Cluster-51324.49451				Cluster-51324.61886
Cluster-51324.95511	Cluster-51324.88585	Cluster-51324.145615	Cluster-51324.45978		Cluster-51324.94190		Cluster-51324.147359		Cluster-51324.115497		Cluster-51324.67441	Cluster-51324.48333	Cluster-51324.94899	Cluster-51324.88975				Cluster-51324.54325
Cluster-51324.61244	Cluster-51324.84542	Cluster-51324.67452	Cluster-51324.50762		Cluster-51324.110087		Cluster-51324.71832		Cluster-51324.89596		Cluster-51324.79932	Cluster-51324.118946	Cluster-51324.115576	Cluster-51324.100584				Cluster-51324.170304
Cluster-51324.90061	Cluster-51324.81527	Cluster-51324.30251	Cluster-51324.173221		Cluster-51324.97703		Cluster-51324.117068		Cluster-51324.51386		Cluster-51324.92600	Cluster-51324.85348	Cluster-51324.83553	Cluster-51324.101630				Cluster-51324.121824
Cluster-51324.66838	Cluster-51324.144061	Cluster-51324.115354	Cluster-51324.155111		Cluster-51324.77674		Cluster-51324.98281		Cluster-51324.108324		Cluster-65749.0	Cluster-51324.151143	Cluster-51324.75140	Cluster-51324.116622				Cluster-51324.105855
Cluster-51324.107165	Cluster-51324.102040	Cluster-51324.103354	Cluster-51324.90747		Cluster-51324.123994		Cluster-51324.117413		Cluster-51324.116785		Cluster-51324.84950	Cluster-51324.157278	Cluster-51324.114309	Cluster-51324.163894				Cluster-51324.54805
Cluster-51324.80286	Cluster-51324.97914	Cluster-51324.74931	Cluster-51324.148136		Cluster-51324.96593		Cluster-51324.111082		Cluster-51324.92621		Cluster-51324.87673	Cluster-51324.150469	Cluster-51324.123435	Cluster-51324.44973				Cluster-51324.64217
Cluster-51324.97362	Cluster-51324.83018	Cluster-51324.105177	Cluster-51324.102589		Cluster-51324.107748		Cluster-51324.92326		Cluster-51324.64736		Cluster-51324.97147	Cluster-51324.130735	Cluster-51324.70882	Cluster-51324.169208				Cluster-51324.66220
Cluster-51324.125611	Cluster-51324.112692	Cluster-51324.106162	Cluster-51324.178085		Cluster-51324.88961		Cluster-51324.84764		Cluster-51324.94119		Cluster-51324.88212	Cluster-51324.81951	Cluster-51324.93004	Cluster-51324.50541				Cluster-51324.98796
Cluster-51324.93819	Cluster-51324.82453	Cluster-51324.123853	Cluster-51324.144235		Cluster-51324.84134		Cluster-51324.91078		Cluster-51324.42352		Cluster-51324.94744	Cluster-51324.125202	Cluster-51324.93037	Cluster-51324.38202				Cluster-51324.54149
Cluster-51324.87240	Cluster-51324.107247	Cluster-51324.121664	Cluster-51324.60115		Cluster-51324.54365		Cluster-51324.85970		Cluster-51324.53245		Cluster-51324.96217	Cluster-51324.38510	Cluster-51324.84066	Cluster-51324.55824				Cluster-51324.54428
Cluster-51324.92215	Cluster-51324.80332	Cluster-51324.75906	Cluster-51324.151246		Cluster-51324.97398		Cluster-51324.88943		Cluster-51324.97970		Cluster-51324.89232	Cluster-51324.97578	Cluster-51324.96784	Cluster-51324.499				Cluster-51324.124907
Cluster-51324.86272	Cluster-51324.89096	Cluster-51324.123945	Cluster-51324.100580		Cluster-51324.59906		Cluster-51324.96841		Cluster-51324.134096		Cluster-51324.105792	Cluster-51324.44887	Cluster-51324.71833	Cluster-51324.109955				Cluster-51324.100409
Cluster-51324.86583	Cluster-51324.90158	Cluster-51324.90923	Cluster-51324.131053		Cluster-51324.118646		Cluster-51324.97175		Cluster-51324.91449		Cluster-51324.97106	Cluster-51324.36798	Cluster-51324.100533	Cluster-51324.104355				Cluster-51324.107464
Cluster-51324.92848	Cluster-51324.93290	Cluster-51324.126349	Cluster-51324.69593		Cluster-51324.86944		Cluster-51324.95482		Cluster-51324.59963		Cluster-51324.95179	Cluster-51324.157272	Cluster-51324.105956	Cluster-51324.129136				Cluster-51324.99018
Cluster-51324.86630	Cluster-51324.53735	Cluster-51324.89599	Cluster-51324.154165		Cluster-51324.84291		Cluster-51324.51909		Cluster-51324.84415		Cluster-51324.94460	Cluster-51324.72736	Cluster-51324.82137	Cluster-51324.90895				Cluster-51324.96268
Cluster-51324.110508	Cluster-51324.148160	Cluster-51324.149358	Cluster-51324.41642		Cluster-51324.104400		Cluster-51324.109776		Cluster-51324.108456		Cluster-51324.78194	Cluster-51324.50292	Cluster-51324.93753	Cluster-51324.2106				Cluster-51324.115746
Cluster-51324.94006	Cluster-51324.114667	Cluster-51324.88944	Cluster-51324.144916		Cluster-51324.81557		Cluster-51324.120972		Cluster-51324.101054		Cluster-51324.121436	Cluster-51324.154815	Cluster-51324.94621	Cluster-51324.69910				Cluster-51324.98985
Cluster-51324.116733	Cluster-51324.99114	Cluster-51324.19162	Cluster-51324.107252		Cluster-51324.84136		Cluster-51324.83173		Cluster-51324.106388		Cluster-51324.101723	Cluster-51324.140974	Cluster-51324.88391	Cluster-51324.56954				Cluster-51324.94303
Cluster-51324.67422	Cluster-51324.70317	Cluster-51324.114658	Cluster-51324.62786		Cluster-51324.134815		Cluster-51324.85967		Cluster-51324.56614		Cluster-51324.92330	Cluster-51324.141044	Cluster-51324.119934	Cluster-51324.139152				Cluster-51324.112904
Cluster-51324.92153	Cluster-51324.81523	Cluster-51324.95864	Cluster-51324.75801		Cluster-51324.93080		Cluster-51324.103209		Cluster-51324.131683		Cluster-51324.94799	Cluster-51324.125219	Cluster-51324.94904	Cluster-51324.90786				Cluster-51324.80101
Cluster-51324.65672	Cluster-51324.88072	Cluster-51324.93764	Cluster-51324.53274		Cluster-51324.71267		Cluster-51324.89388		Cluster-51324.144343		Cluster-51324.79938	Cluster-51324.99328	Cluster-51324.87939	Cluster-51324.153070				Cluster-51324.51540
Cluster-51324.93388	Cluster-51324.124737	Cluster-51324.56874	Cluster-51324.37482		Cluster-51324.70459		Cluster-51324.94489		Cluster-51324.63386		Cluster-51324.88909	Cluster-51324.66027	Cluster-51324.141405	Cluster-51324.61022				Cluster-51324.149739
Cluster-51324.69246	Cluster-51324.117323	Cluster-51324.78091	Cluster-51324.52918		Cluster-51324.84267		Cluster-51324.91908		Cluster-51324.115851		Cluster-51324.100691	Cluster-51324.147344	Cluster-51324.107543	Cluster-51324.103563				Cluster-51324.76940
Cluster-51324.70437	Cluster-51324.72073	Cluster-51324.112410	Cluster-51324.163931		Cluster-51324.86853		Cluster-51324.91753		Cluster-51324.155915		Cluster-51324.104987	Cluster-51324.154403	Cluster-51324.101585	Cluster-51324.101827				Cluster-51324.106101
Cluster-51324.79168	Cluster-51324.144323	Cluster-51324.114605	Cluster-51324.133858		Cluster-51324.97395		Cluster-51324.75679		Cluster-51324.83002		Cluster-51324.52665	Cluster-51324.144869	Cluster-51324.107516	Cluster-51324.120291				Cluster-51324.92622
Cluster-51324.168217	Cluster-51324.104395	Cluster-51324.113237	Cluster-51324.53768				Cluster-51324.141701		Cluster-51324.116567		Cluster-51324.100384	Cluster-51324.174788	Cluster-51324.95510	Cluster-51324.70610				Cluster-51324.76032
Cluster-51324.81373	Cluster-51324.127895	Cluster-51324.90210	Cluster-51324.87965				Cluster-51324.96021		Cluster-51324.30395		Cluster-51324.82822	Cluster-51324.37235	Cluster-51324.95649	Cluster-51324.123071				Cluster-51324.95368
Cluster-51324.53650	Cluster-51324.83337	Cluster-51324.82162	Cluster-51324.43364				Cluster-51324.131951		Cluster-51324.97711		Cluster-51324.90029	Cluster-51324.114001	Cluster-51324.122919	Cluster-51324.85923				Cluster-51324.180883
Cluster-51324.73933	Cluster-51324.85577	Cluster-51324.30378	Cluster-51324.90704				Cluster-51324.87978		Cluster-51324.141023		Cluster-51324.100414	Cluster-51324.151577	Cluster-51324.101290	Cluster-51324.100119				Cluster-51324.91383
Cluster-51324.117046	Cluster-51324.72421	Cluster-51324.78876	Cluster-51324.51638				Cluster-51324.88236		Cluster-51324.103676		Cluster-51324.99214	Cluster-51324.80623	Cluster-51324.83574	Cluster-51324.57387				Cluster-51324.88616
Cluster-51324.119738	Cluster-51324.97835	Cluster-51324.120885	Cluster-51324.69987				Cluster-51324.98450		Cluster-51324.97884		Cluster-51324.96821	Cluster-51324.125790	Cluster-51324.92712	Cluster-51324.76481				Cluster-51324.52464
Cluster-51324.61059	Cluster-51324.88239	Cluster-51324.65750	Cluster-51324.47818				Cluster-51324.126922		Cluster-51324.141918		Cluster-51324.114497	Cluster-51324.64514	Cluster-51324.95550	Cluster-51324.78181				Cluster-51324.91728
Cluster-51324.76740	Cluster-51324.64072	Cluster-51324.94456	Cluster-51324.114938				Cluster-51324.96473		Cluster-51324.86185		Cluster-51324.91904	Cluster-51324.111929	Cluster-51324.106054	Cluster-51324.95153				Cluster-51324.147291
Cluster-51324.88824	Cluster-51324.92029	Cluster-51324.55784	Cluster-51324.50759						Cluster-51324.144117		Cluster-51324.95832	Cluster-51324.75442	Cluster-51324.95311	Cluster-51324.90096				Cluster-59990.0
Cluster-51324.116952	Cluster-51324.68346	Cluster-51324.93188	Cluster-51324.130589						Cluster-51324.69236		Cluster-51324.79486	Cluster-51324.151199	Cluster-51324.107886	Cluster-51324.89048				Cluster-51324.63992
Cluster-51324.119410	Cluster-51324.52401	Cluster-51324.85645	Cluster-51324.95092						Cluster-51324.94510		Cluster-51324.94963	Cluster-51324.49111	Cluster-51324.100221	Cluster-51324.137131				Cluster-51324.94202
Cluster-51324.101005	Cluster-51324.87095	Cluster-51324.82058	Cluster-51324.52278						Cluster-51324.150640		Cluster-51324.100115	Cluster-51324.168572	Cluster-51324.119077	Cluster-51324.101563				Cluster-51324.40317
Cluster-51324.112263	Cluster-51324.49983	Cluster-51324.73964	Cluster-51324.106039						Cluster-51324.67962		Cluster-51324.92579	Cluster-51324.45401	Cluster-51324.87104	Cluster-51324.118196				Cluster-51324.63148
Cluster-51324.109289	Cluster-51324.45776	Cluster-51324.109648	Cluster-51324.125746						Cluster-51324.67154		Cluster-51324.88788	Cluster-51324.142190	Cluster-51324.98336	Cluster-51324.108915				Cluster-51324.88184
Cluster-51324.122869	Cluster-51324.82026	Cluster-51324.142037	Cluster-51324.43884						Cluster-51324.110433		Cluster-51324.121278	Cluster-51324.38685	Cluster-51324.95972	Cluster-51324.75071				Cluster-51324.113863
Cluster-51324.143425	Cluster-51324.86079	Cluster-51324.51894	Cluster-51324.53766						Cluster-51324.143722		Cluster-51324.117842	Cluster-51324.157288	Cluster-51324.100364	Cluster-51324.106218				Cluster-51324.83231
Cluster-51324.120196	Cluster-51324.89097	Cluster-51324.98356	Cluster-51324.145968						Cluster-51324.77447		Cluster-51324.107399	Cluster-51324.46106	Cluster-51324.136303	Cluster-51324.116508				Cluster-51324.100660
Cluster-51324.79951	Cluster-51324.43261	Cluster-51324.118418	Cluster-51324.90222						Cluster-51324.75232		Cluster-51324.124243	Cluster-51324.163935	Cluster-51324.90947	Cluster-51324.84015				Cluster-51324.94257
Cluster-51324.120597	Cluster-51324.37049	Cluster-51324.158457	Cluster-51324.106595						Cluster-51324.37733		Cluster-51324.128094	Cluster-51324.114276	Cluster-51324.167909	Cluster-51324.102338				Cluster-51324.141998
Cluster-51324.97794	Cluster-51324.68226	Cluster-51324.85281	Cluster-51324.148381						Cluster-51324.53732		Cluster-51324.88025	Cluster-51324.29369	Cluster-51324.93480	Cluster-51324.129413				Cluster-51324.85456
Cluster-51324.108165	Cluster-51324.109785	Cluster-51324.110011	Cluster-51324.48719						Cluster-51324.144856		Cluster-51324.96332	Cluster-51324.100916	Cluster-51324.86276	Cluster-51324.108244				Cluster-51324.100615
Cluster-51324.154670	Cluster-51324.127527	Cluster-51324.93529	Cluster-51324.149250						Cluster-51324.51816		Cluster-51324.66403	Cluster-51324.138057	Cluster-51324.67908	Cluster-51324.105959				Cluster-51324.90062
Cluster-51324.166972	Cluster-51324.50951	Cluster-51324.86895	Cluster-51324.144582						Cluster-51324.128437		Cluster-51324.69772	Cluster-51324.50931	Cluster-51324.64620	Cluster-51324.130971				Cluster-51324.106540
Cluster-51324.110548	Cluster-51324.84473	Cluster-51324.135527	Cluster-51324.71417						Cluster-51324.97275		Cluster-51324.86608	Cluster-51324.158504	Cluster-51324.87130	Cluster-51324.62302				Cluster-51324.101031
Cluster-51324.33134	Cluster-51324.148129	Cluster-51324.119880	Cluster-51324.43197						Cluster-51324.98055		Cluster-51324.81749	Cluster-51324.52646	Cluster-51324.63552	Cluster-51324.97262				Cluster-51324.47936
Cluster-51324.52425	Cluster-51324.84720	Cluster-51324.88317	Cluster-51324.52727						Cluster-51324.98481		Cluster-51324.103300	Cluster-51324.51960	Cluster-51324.99419	Cluster-51324.92455				Cluster-51324.106489
Cluster-51324.99055	Cluster-51324.70439	Cluster-51324.91944	Cluster-51324.161109						Cluster-51324.86525		Cluster-51324.101087	Cluster-51324.95680	Cluster-51324.110999	Cluster-51324.126270				Cluster-51324.91811
Cluster-51324.146092	Cluster-51324.86070	Cluster-51324.98138	Cluster-51324.100598						Cluster-51324.97350		Cluster-51324.89383	Cluster-51324.47054	Cluster-51324.95117	Cluster-51324.104287				Cluster-51324.82303
Cluster-51324.158751	Cluster-51324.92607	Cluster-51324.78971	Cluster-51324.141387						Cluster-51324.53404		Cluster-51324.94240	Cluster-51324.93423	Cluster-51324.95095	Cluster-51324.94402				Cluster-51324.116728
Cluster-51324.121347	Cluster-51324.92556	Cluster-51324.117803	Cluster-51324.54027						Cluster-51324.164606		Cluster-51324.92533	Cluster-51324.173906	Cluster-51324.56211	Cluster-51324.79165				Cluster-51324.99063
Cluster-51324.140132	Cluster-51324.69765	Cluster-51324.89411	Cluster-51324.62638						Cluster-51324.77068		Cluster-51324.88967	Cluster-51324.150819	Cluster-51324.85783	Cluster-51324.84598				Cluster-51324.102886
Cluster-51324.150155	Cluster-51324.145979	Cluster-51324.82206	Cluster-51324.176080						Cluster-51324.145408		Cluster-51324.56924	Cluster-51324.93899	Cluster-51324.89882	Cluster-51324.124581				Cluster-51324.71870
Cluster-51324.94198	Cluster-51324.143257	Cluster-51324.141914	Cluster-51324.95155						Cluster-51324.35065		Cluster-51324.84363	Cluster-51324.50294	Cluster-51324.110207	Cluster-51324.149654				Cluster-51324.85462
Cluster-51324.88133	Cluster-51324.86085	Cluster-51324.103290	Cluster-51324.49516						Cluster-51324.111740		Cluster-51324.89380	Cluster-51324.154350	Cluster-51324.87147	Cluster-51324.118728				Cluster-51324.120267
Cluster-51324.142205	Cluster-51324.92505	Cluster-51324.116377	Cluster-51324.54658						Cluster-51324.149554		Cluster-51324.80787	Cluster-51324.143191	Cluster-51324.63852	Cluster-51324.117840				Cluster-51324.100317
Cluster-51324.65241	Cluster-51324.64903	Cluster-51324.194163	Cluster-51324.81948						Cluster-51324.94146			Cluster-51324.64440	Cluster-51324.90580	Cluster-51324.97640				Cluster-51324.143941
Cluster-51324.67679	Cluster-51324.81044	Cluster-51324.82782	Cluster-51324.146411						Cluster-51324.107984			Cluster-51324.50968	Cluster-51324.107274	Cluster-51324.68205				Cluster-51324.57704
Cluster-51324.94815	Cluster-51324.120730	Cluster-51324.94518	Cluster-51324.93544						Cluster-51324.96983			Cluster-51324.65317	Cluster-51324.113618	Cluster-51324.106791				Cluster-51324.88315
Cluster-51324.129350	Cluster-51324.71346	Cluster-51324.77540	Cluster-51324.100906						Cluster-51324.68373			Cluster-51324.113336	Cluster-51324.84242	Cluster-51324.65803				Cluster-51324.40899
Cluster-51324.89019	Cluster-51324.141599	Cluster-51324.88494	Cluster-51324.49862						Cluster-51324.109279			Cluster-51324.162812	Cluster-51324.92678	Cluster-51324.74845				Cluster-51324.84615
Cluster-51324.192590	Cluster-51324.90376	Cluster-51324.105354	Cluster-51324.106927						Cluster-51324.87267			Cluster-51324.109103	Cluster-51324.126520	Cluster-51324.52666				Cluster-51324.90857
Cluster-51324.106354	Cluster-51324.84722	Cluster-51324.39558	Cluster-51324.46307						Cluster-51324.165263			Cluster-51324.145415	Cluster-51324.107788	Cluster-51324.154529				Cluster-51324.117496
Cluster-51324.75843	Cluster-51324.64898	Cluster-51324.59482	Cluster-51324.144915						Cluster-51324.83722			Cluster-51324.50104	Cluster-51324.105300	Cluster-51324.46229				Cluster-51324.97148
Cluster-51324.75245	Cluster-51324.96215	Cluster-51324.97931	Cluster-51324.141611						Cluster-51324.16261			Cluster-51324.142529	Cluster-51324.80707	Cluster-51324.117619				Cluster-51324.84334
Cluster-51324.83974	Cluster-51324.62825	Cluster-51324.43568	Cluster-51324.53252						Cluster-51324.126681			Cluster-51324.70878	Cluster-51324.89886	Cluster-51324.81768				Cluster-51324.112977
Cluster-51324.97727	Cluster-51324.131280	Cluster-51324.93800	Cluster-51324.76048						Cluster-51324.87211			Cluster-51324.162108	Cluster-51324.97347	Cluster-51324.68875				Cluster-51324.137660
Cluster-51324.115033	Cluster-51324.91437	Cluster-51324.85253	Cluster-51324.108893						Cluster-51324.83936			Cluster-51324.93910	Cluster-51324.92286	Cluster-51324.38522				Cluster-51324.113561
Cluster-51324.88280	Cluster-51324.89629	Cluster-51324.121605	Cluster-51324.92451						Cluster-51324.121520			Cluster-51324.65578	Cluster-51324.96958	Cluster-51324.159973				Cluster-51324.99886
Cluster-51324.121223	Cluster-51324.77626	Cluster-51324.142951	Cluster-51324.94451						Cluster-51324.106617			Cluster-51324.92550	Cluster-51324.94064	Cluster-51324.81761				Cluster-51324.92620
Cluster-51324.75675	Cluster-51324.146275	Cluster-51324.46980	Cluster-51324.112687						Cluster-51324.56144			Cluster-51324.98866	Cluster-51324.84948	Cluster-51324.180119				Cluster-51324.109673
Cluster-51324.122309	Cluster-51324.93895	Cluster-51324.98544	Cluster-51324.96154						Cluster-51324.88284			Cluster-51324.36451	Cluster-51324.94318	Cluster-51324.125989				Cluster-51324.93803
Cluster-51324.142713	Cluster-51324.144622	Cluster-51324.135774	Cluster-51324.54415						Cluster-51324.113212			Cluster-51324.69672	Cluster-51324.61681	Cluster-51324.117920				Cluster-51324.115883
Cluster-51324.93930	Cluster-51324.51449	Cluster-51324.92126	Cluster-51324.144219						Cluster-51324.101168			Cluster-51324.154051	Cluster-51324.58704	Cluster-51324.99122				Cluster-51324.99217
Cluster-51324.100244	Cluster-51324.136883	Cluster-51324.101157	Cluster-51324.99918						Cluster-51324.53302			Cluster-51324.62305	Cluster-51324.95570	Cluster-51324.85677				Cluster-51324.50100
Cluster-51324.105922	Cluster-51324.141557	Cluster-51324.153402	Cluster-51324.109263						Cluster-51324.63951			Cluster-51324.118677	Cluster-51324.111846	Cluster-51324.67078				Cluster-51324.150692
Cluster-51324.111625	Cluster-51324.102555	Cluster-51324.101805	Cluster-51324.49723						Cluster-51324.64660			Cluster-51324.157474	Cluster-51324.99589	Cluster-51324.121252				Cluster-51324.125041
Cluster-51324.82478	Cluster-51324.104302	Cluster-51324.68716	Cluster-51324.48137						Cluster-51324.89763			Cluster-51324.53584	Cluster-51324.99035	Cluster-51324.176342				Cluster-51324.115444
Cluster-51324.129554	Cluster-51324.93300	Cluster-51324.104783	Cluster-51324.35080						Cluster-51324.132513			Cluster-51324.139052	Cluster-51324.108863	Cluster-51324.93677				Cluster-51324.110939
Cluster-51324.107079	Cluster-51324.101874	Cluster-51324.99629	Cluster-51324.47931						Cluster-51324.86177			Cluster-51324.70551	Cluster-51324.103948	Cluster-51324.115739				Cluster-51324.91374
Cluster-51324.87284	Cluster-51324.145608	Cluster-51324.105990	Cluster-51324.158093						Cluster-51324.100426			Cluster-51324.70517	Cluster-51324.75475	Cluster-51324.118012				Cluster-51324.71420
Cluster-51324.85575	Cluster-51324.99119	Cluster-51324.102578	Cluster-51324.7245						Cluster-51324.41507			Cluster-51324.44422	Cluster-51324.91173	Cluster-51324.32550				Cluster-51324.111340
Cluster-51324.101230	Cluster-51324.66799	Cluster-51324.88366	Cluster-51324.51565						Cluster-51324.100023			Cluster-51324.146071	Cluster-51324.107219	Cluster-51324.86273				Cluster-51324.114120
Cluster-51324.94910	Cluster-51324.78638	Cluster-51324.94241	Cluster-51324.101136						Cluster-51324.142673			Cluster-51324.108380	Cluster-51324.93898	Cluster-51324.122960				Cluster-51324.160155
Cluster-51324.82853	Cluster-51324.89968	Cluster-51324.115869	Cluster-51324.154141						Cluster-51324.62961			Cluster-51324.104000	Cluster-51324.92283	Cluster-51324.108320				Cluster-51324.77028
Cluster-51324.159043	Cluster-51324.102967	Cluster-51324.133438	Cluster-51324.99190						Cluster-51324.147543			Cluster-51324.150501	Cluster-51324.60271	Cluster-51324.87265				Cluster-51324.74221
Cluster-51324.90608	Cluster-51324.91390	Cluster-51324.78580	Cluster-51324.88083						Cluster-51324.113549			Cluster-51324.110788	Cluster-51324.94299	Cluster-51324.84127				Cluster-51324.84121
Cluster-51324.94085	Cluster-51324.114060	Cluster-51324.107685	Cluster-51324.141452						Cluster-51324.84025			Cluster-51324.54860	Cluster-51324.167911	Cluster-51324.86471				Cluster-51324.146200
Cluster-51324.63811	Cluster-51324.70404	Cluster-51324.89300	Cluster-51324.163464						Cluster-51324.75560			Cluster-51324.46622	Cluster-51324.30099	Cluster-51324.85219				Cluster-51324.115934
Cluster-51324.85287	Cluster-51324.90367	Cluster-51324.57329	Cluster-51324.50852						Cluster-51324.136719			Cluster-51324.49172	Cluster-51324.108357	Cluster-51324.105644				Cluster-51324.109603
Cluster-51324.55210	Cluster-51324.49507	Cluster-51324.93612	Cluster-51324.169164						Cluster-51324.58558			Cluster-51324.152878	Cluster-51324.113487	Cluster-51324.61729				Cluster-51324.92703
Cluster-51324.156838	Cluster-51324.118313	Cluster-51324.121356	Cluster-51324.142877						Cluster-51324.148159			Cluster-51324.7269	Cluster-51324.131936	Cluster-51324.83284				Cluster-51324.115915
Cluster-51324.85675	Cluster-51324.103820	Cluster-51324.132058	Cluster-51324.130737						Cluster-51324.160441			Cluster-51324.157489	Cluster-51324.115342	Cluster-51324.149493				Cluster-51324.141548
Cluster-51324.97413	Cluster-51324.70225	Cluster-51324.109375	Cluster-51324.144241						Cluster-51324.52815			Cluster-51324.54170	Cluster-51324.92699	Cluster-51324.78326				Cluster-51324.114331
Cluster-51324.76520	Cluster-51324.86801	Cluster-51324.128901	Cluster-51324.144512						Cluster-51324.111524			Cluster-51324.135493	Cluster-51324.59625	Cluster-51324.112348				Cluster-51324.66052
Cluster-51324.92383	Cluster-51324.101426	Cluster-51324.105774	Cluster-51324.97616						Cluster-51324.66688			Cluster-51324.43961	Cluster-51324.67539	Cluster-51324.115740				Cluster-51324.98132
Cluster-51324.104873	Cluster-51324.102617	Cluster-51324.116444	Cluster-51324.143544						Cluster-51324.86913			Cluster-51324.47816	Cluster-51324.62446	Cluster-51324.133740				Cluster-51324.133324
Cluster-51324.70562	Cluster-51324.93141	Cluster-51324.111332	Cluster-51324.121527						Cluster-51324.80980			Cluster-51324.36166	Cluster-51324.70773	Cluster-51324.113587				Cluster-51324.124085
Cluster-51324.49112	Cluster-51324.101101	Cluster-51324.112304	Cluster-51324.66252						Cluster-51324.70226			Cluster-51324.142333	Cluster-51324.98769	Cluster-51324.110313				Cluster-51324.95513
Cluster-51324.94321	Cluster-51324.78881	Cluster-51324.96255	Cluster-51324.90748						Cluster-51324.116562			Cluster-51324.147074	Cluster-51324.111566	Cluster-51324.119270				Cluster-51324.107158
Cluster-51324.97998	Cluster-51324.125463	Cluster-51324.79567	Cluster-51324.156707						Cluster-51324.88818			Cluster-51324.156011	Cluster-51324.95177	Cluster-51324.107959				Cluster-51324.113132
Cluster-51324.130624	Cluster-51324.64040	Cluster-51324.57962	Cluster-51324.22365						Cluster-51324.91320			Cluster-51324.74351	Cluster-51324.95137	Cluster-51324.92935				Cluster-51324.75851
Cluster-51324.46521	Cluster-51324.48993	Cluster-51324.87254	Cluster-51324.118170						Cluster-51324.84589			Cluster-51324.46415	Cluster-51324.95228	Cluster-51324.84086				Cluster-51324.64092
Cluster-51324.93785	Cluster-51324.92030	Cluster-51324.158432	Cluster-51324.91502						Cluster-51324.78089			Cluster-51324.109046	Cluster-51324.101314	Cluster-51324.87709				Cluster-51324.86416
Cluster-51324.40698	Cluster-51324.117353	Cluster-51324.136422	Cluster-51324.113310						Cluster-51324.67701			Cluster-51324.151575	Cluster-51324.95224	Cluster-51324.138895				Cluster-51324.64962
Cluster-51324.85753	Cluster-51324.37928	Cluster-51324.91583	Cluster-51324.85180						Cluster-51324.110940			Cluster-51324.109928	Cluster-51324.55756	Cluster-51324.96957				Cluster-51324.84661
Cluster-51324.93501	Cluster-51324.170405	Cluster-51324.120713							Cluster-51324.152776			Cluster-51324.51259	Cluster-51324.102488	Cluster-51324.164850				Cluster-51324.55049
Cluster-51324.69700	Cluster-51324.103168	Cluster-51324.11605							Cluster-51324.105103			Cluster-51324.155951	Cluster-51324.95206	Cluster-51324.48902				Cluster-51324.116939
Cluster-51324.76654	Cluster-51324.52030	Cluster-51324.43617							Cluster-51324.69250			Cluster-51324.138770	Cluster-51324.99090	Cluster-51324.115059				Cluster-51324.86222
Cluster-51324.127872	Cluster-51324.71307	Cluster-51324.113034							Cluster-25347.0			Cluster-51324.53487	Cluster-51324.78386	Cluster-51324.85289				Cluster-51324.32951
Cluster-51324.96436	Cluster-51324.84506	Cluster-51324.96305							Cluster-51324.36125			Cluster-51324.121523	Cluster-51324.98911	Cluster-51324.44367				Cluster-51324.62193
Cluster-51324.76511	Cluster-51324.148130	Cluster-51324.86332							Cluster-51324.108565			Cluster-51324.41197	Cluster-51324.111816	Cluster-51324.106938				Cluster-29495.0
Cluster-51324.73536	Cluster-51324.86081	Cluster-51324.81413							Cluster-51324.104607			Cluster-51324.32984	Cluster-51324.71535	Cluster-51324.174548				Cluster-51324.87226
Cluster-51324.180139	Cluster-51324.145686	Cluster-51324.118487							Cluster-51324.68271			Cluster-51324.88119	Cluster-51324.93116	Cluster-51324.88179				Cluster-51324.145950
Cluster-51324.91251	Cluster-51324.126440	Cluster-51324.203089							Cluster-51324.113234			Cluster-51324.48553	Cluster-51324.97950	Cluster-51324.57792				Cluster-51324.81788
Cluster-51324.115212	Cluster-51324.84996	Cluster-51324.113629							Cluster-51324.115751			Cluster-51324.94007	Cluster-51324.146751	Cluster-51324.135721				Cluster-51324.64403
Cluster-51324.91866	Cluster-51324.106687	Cluster-51324.64498							Cluster-51324.81895			Cluster-51324.166337	Cluster-51324.85260	Cluster-51324.71708				Cluster-51324.139673
Cluster-51324.129991	Cluster-51324.94077	Cluster-51324.104758							Cluster-51324.146210			Cluster-51324.51549	Cluster-51324.93977	Cluster-51324.96293				Cluster-51324.83474
Cluster-51324.118729	Cluster-51324.143297	Cluster-51324.136304							Cluster-51324.41716			Cluster-51324.62451	Cluster-51324.51895	Cluster-51324.36654				Cluster-51324.44956
Cluster-51324.174820	Cluster-51324.143258	Cluster-51324.65465							Cluster-51324.146209			Cluster-51324.54891	Cluster-51324.91682	Cluster-51324.120536				Cluster-51324.151513
Cluster-51324.23963	Cluster-51324.69374	Cluster-51324.50140							Cluster-51324.64734			Cluster-51324.70883	Cluster-51324.106283	Cluster-51324.95255				Cluster-51324.72618
Cluster-51324.157169	Cluster-51324.84625	Cluster-51324.101613							Cluster-51324.135624			Cluster-51324.44505	Cluster-51324.106990	Cluster-51324.128878				Cluster-51324.57471
Cluster-51324.75604	Cluster-51324.100645	Cluster-51324.102333							Cluster-51324.93889			Cluster-51324.145187	Cluster-51324.62747	Cluster-51324.113440				Cluster-51324.59108
Cluster-51324.73367	Cluster-51324.79527	Cluster-51324.83007							Cluster-51324.146959			Cluster-51324.125296	Cluster-51324.93696	Cluster-51324.131437				Cluster-51324.98496
Cluster-51324.74210	Cluster-51324.87096	Cluster-51324.116831							Cluster-51324.44120			Cluster-51324.69243	Cluster-51324.96649	Cluster-51324.88754				Cluster-51324.104178
Cluster-51324.152394	Cluster-51324.131346	Cluster-51324.154278							Cluster-51324.124176			Cluster-51324.142863	Cluster-51324.151804	Cluster-51324.78987				Cluster-51324.162892
Cluster-51324.81814	Cluster-51324.101581	Cluster-51324.140282							Cluster-51324.155602			Cluster-51324.51173	Cluster-51324.96847	Cluster-51324.73600				Cluster-51324.81562
Cluster-51324.106546	Cluster-51324.36938	Cluster-51324.67764							Cluster-51324.104955			Cluster-51324.138281	Cluster-51324.96082	Cluster-51324.89429				Cluster-51324.53648
Cluster-51324.86982	Cluster-51324.97738	Cluster-51324.79836							Cluster-51324.138774			Cluster-51324.144138	Cluster-51324.78092	Cluster-51324.97577				Cluster-51324.107144
Cluster-51324.87112	Cluster-51324.131342	Cluster-51324.112628							Cluster-51324.110234			Cluster-51324.115053	Cluster-51324.94153	Cluster-51324.105643				Cluster-51324.70662
Cluster-51324.86512	Cluster-51324.131348	Cluster-51324.192030							Cluster-51324.178421			Cluster-51324.146296	Cluster-51324.95286	Cluster-51324.114857				Cluster-51324.105238
Cluster-51324.93495	Cluster-51324.104385	Cluster-51324.94865							Cluster-51324.139345			Cluster-51324.52892	Cluster-51324.74212	Cluster-51324.86171				Cluster-51324.137667
Cluster-51324.97557	Cluster-51324.42736	Cluster-51324.79393							Cluster-51324.93302			Cluster-51324.87568	Cluster-51324.143097	Cluster-51324.71995				Cluster-51324.103815
Cluster-51324.93780	Cluster-51324.83804	Cluster-51324.175954							Cluster-51324.105437			Cluster-51324.103745	Cluster-51324.90116	Cluster-51324.115850				Cluster-51324.132951
Cluster-51324.127641	Cluster-51324.156522	Cluster-51324.77652							Cluster-51324.82809			Cluster-51324.90296	Cluster-51324.94801	Cluster-51324.146228				Cluster-51324.90303
Cluster-51324.155293	Cluster-51324.106684	Cluster-51324.102545							Cluster-51324.86903			Cluster-51324.65541	Cluster-51324.91411	Cluster-51324.79351				Cluster-51324.99149
Cluster-51324.103461	Cluster-51324.50925	Cluster-51324.51429							Cluster-51324.88406			Cluster-51324.135082	Cluster-51324.65081	Cluster-51324.89991				Cluster-51324.75997
Cluster-51324.77829	Cluster-51324.143256	Cluster-51324.192916							Cluster-51324.67697			Cluster-51324.34867	Cluster-51324.94797	Cluster-51324.77838				Cluster-51324.96811
Cluster-51324.101055	Cluster-51324.100925	Cluster-51324.111275							Cluster-51324.84396			Cluster-51324.147810	Cluster-51324.125805	Cluster-51324.149996				Cluster-51324.83396
Cluster-51324.97065	Cluster-51324.98143	Cluster-51324.52075							Cluster-51324.78494			Cluster-51324.67176	Cluster-51324.93498	Cluster-51324.85286				Cluster-51324.24749
Cluster-51324.53747	Cluster-51324.86080	Cluster-51324.87857							Cluster-51324.72671			Cluster-51324.149454	Cluster-51324.103145	Cluster-51324.111031				Cluster-51324.92107
Cluster-51324.79443	Cluster-51324.65021	Cluster-51324.121427							Cluster-51324.53661			Cluster-51324.107767	Cluster-51324.143429	Cluster-51324.107521				Cluster-51324.120832
Cluster-51324.50809	Cluster-51324.86083	Cluster-51324.35047							Cluster-51324.84534			Cluster-51324.53470	Cluster-51324.95502	Cluster-51324.105706				Cluster-51324.132149
Cluster-51324.97988	Cluster-51324.101053	Cluster-51324.103337							Cluster-51324.95673			Cluster-51324.102186	Cluster-51324.110022	Cluster-51324.94617				Cluster-51324.52648
Cluster-51324.113026	Cluster-51324.103824	Cluster-51324.55488							Cluster-51324.83809			Cluster-51324.37332	Cluster-51324.178370	Cluster-51324.87920				Cluster-51324.109083
Cluster-51324.121314	Cluster-51324.117992	Cluster-51324.90487							Cluster-51324.46407			Cluster-51324.64528	Cluster-51324.185170	Cluster-51324.79072				Cluster-51324.60640
Cluster-51324.147581	Cluster-51324.90195	Cluster-51324.95253							Cluster-51324.131981			Cluster-51324.54071	Cluster-51324.87461	Cluster-51324.111141				Cluster-51324.96348
Cluster-51324.112685	Cluster-51324.86071	Cluster-51324.67470							Cluster-51324.89843			Cluster-51324.53345	Cluster-51324.87087	Cluster-51324.133075				Cluster-51324.108578
Cluster-51324.83403	Cluster-51324.53872	Cluster-51324.152186							Cluster-51324.48495			Cluster-51324.120953	Cluster-51324.82316	Cluster-51324.112035				Cluster-51324.110438
Cluster-51324.93594	Cluster-51324.72307	Cluster-51324.103355							Cluster-51324.83052			Cluster-51324.106969	Cluster-51324.93515	Cluster-51324.137364				Cluster-51324.84362
Cluster-51324.168575	Cluster-51324.72717	Cluster-51324.167927							Cluster-51324.164891			Cluster-51324.149396	Cluster-51324.94320	Cluster-51324.110085				Cluster-51324.109345
Cluster-51324.89943	Cluster-51324.101582	Cluster-51324.10177							Cluster-51324.11909			Cluster-51324.148178	Cluster-51324.92166	Cluster-51324.79116				Cluster-51324.103968
Cluster-51324.155264	Cluster-51324.126175	Cluster-51324.108385							Cluster-51324.96864			Cluster-51324.91570	Cluster-51324.88912	Cluster-51324.109370				Cluster-51324.89982
Cluster-51324.102119	Cluster-51324.86069	Cluster-51324.42863							Cluster-51324.103462			Cluster-51324.42789	Cluster-51324.95104	Cluster-51324.106847				Cluster-51324.59539
Cluster-51324.100667	Cluster-51324.39374	Cluster-51324.32602							Cluster-51324.93411			Cluster-51324.53256	Cluster-51324.87972	Cluster-51324.93699				Cluster-51324.100128
Cluster-51324.96094	Cluster-51324.87306	Cluster-51324.102347							Cluster-51324.105144			Cluster-51324.70951	Cluster-51324.96948	Cluster-51324.80991				Cluster-51324.118468
Cluster-51324.86719	Cluster-51324.81114	Cluster-51324.98119							Cluster-51324.141114			Cluster-51324.85459	Cluster-51324.95423	Cluster-51324.83876				Cluster-51324.128640
Cluster-51324.165355	Cluster-51324.145978	Cluster-51324.44640							Cluster-51324.70605			Cluster-51324.123481	Cluster-51324.52891	Cluster-51324.130848				Cluster-51324.94847
Cluster-51324.77633	Cluster-51324.100928	Cluster-51324.105138							Cluster-51324.49419			Cluster-51324.46193	Cluster-51324.95243	Cluster-51324.139001				Cluster-51324.72067
Cluster-51324.64902	Cluster-51324.78901	Cluster-51324.122330							Cluster-51324.99080			Cluster-51324.171775	Cluster-51324.110338	Cluster-51324.113180				Cluster-51324.151003
Cluster-51324.100540	Cluster-51324.81387	Cluster-51324.99926							Cluster-51324.65836			Cluster-51324.141275	Cluster-51324.54023	Cluster-51324.115462				Cluster-51324.93799
Cluster-51324.102585	Cluster-51324.83126	Cluster-51324.95915							Cluster-51324.168986			Cluster-51324.43020	Cluster-51324.93628	Cluster-51324.85179				Cluster-51324.126089
Cluster-51324.83878	Cluster-51324.95912	Cluster-51324.53336							Cluster-51324.40907			Cluster-51324.140994	Cluster-51324.99825	Cluster-51324.104908				Cluster-51324.120879
Cluster-51324.68463	Cluster-51324.116966	Cluster-51324.86690							Cluster-51324.88057			Cluster-51324.156895	Cluster-51324.99984	Cluster-51324.117548				Cluster-51324.112631
Cluster-51324.112679	Cluster-51324.123442	Cluster-51324.87853							Cluster-51324.141993			Cluster-51324.151454	Cluster-51324.96889	Cluster-51324.98353				Cluster-51324.89247
Cluster-51324.83824	Cluster-51324.58462	Cluster-51324.79704							Cluster-51324.64790			Cluster-51324.113881	Cluster-51324.95001	Cluster-51324.129635				Cluster-51324.92315
Cluster-51324.72727	Cluster-51324.54212	Cluster-51324.109810							Cluster-51324.57199			Cluster-51324.47020	Cluster-51324.83250	Cluster-51324.156755				Cluster-51324.143422
Cluster-51324.110502	Cluster-51324.89868	Cluster-51324.132194							Cluster-51324.135464			Cluster-51324.100905	Cluster-51324.57793	Cluster-51324.191419				Cluster-51324.123502
Cluster-51324.23271	Cluster-51324.71381	Cluster-51324.60599							Cluster-51324.144491			Cluster-51324.96233	Cluster-51324.104476	Cluster-51324.85021				Cluster-51324.144348
Cluster-51324.88376	Cluster-51324.144946	Cluster-51324.128865							Cluster-51324.15699			Cluster-51324.55850	Cluster-51324.87594	Cluster-51324.119948				Cluster-51324.102311
Cluster-51324.70297	Cluster-51324.124657	Cluster-51324.93936							Cluster-51324.104402			Cluster-51324.91606	Cluster-51324.99959	Cluster-51324.124500				Cluster-51324.94326
Cluster-51324.143958	Cluster-51324.91393	Cluster-51324.103224							Cluster-51324.144852			Cluster-51324.35032	Cluster-51324.90167	Cluster-51324.140356				Cluster-51324.63328
Cluster-51324.116145	Cluster-51324.52687	Cluster-51324.108331							Cluster-51324.45294			Cluster-51324.149747	Cluster-51324.154174	Cluster-51324.113182				Cluster-51324.84768
Cluster-51324.72041	Cluster-51324.105381	Cluster-51324.130445							Cluster-51324.125168			Cluster-51324.144000	Cluster-51324.93448	Cluster-51324.91884				Cluster-51324.100106
Cluster-51324.134216	Cluster-51324.141841	Cluster-51324.96677							Cluster-51324.102576			Cluster-51324.117434	Cluster-51324.96434	Cluster-51324.99302				Cluster-51324.82692
Cluster-51324.120632	Cluster-51324.89181	Cluster-51324.122431							Cluster-51324.146212			Cluster-51324.62784	Cluster-51324.117633	Cluster-51324.204808				Cluster-51324.96012
Cluster-51324.112883	Cluster-51324.45514	Cluster-51324.194148							Cluster-51324.46860			Cluster-51324.143584	Cluster-51324.120948	Cluster-51324.132728				Cluster-51324.84639
Cluster-51324.105710	Cluster-51324.19775	Cluster-51324.55646							Cluster-51324.40536			Cluster-51324.89694	Cluster-51324.95084	Cluster-51324.71020				Cluster-51324.103716
Cluster-51324.101170	Cluster-51324.61883	Cluster-51324.131796							Cluster-51324.92762			Cluster-51324.35383	Cluster-51324.99915	Cluster-51324.106650				Cluster-51324.97558
Cluster-51324.96267	Cluster-51324.101300	Cluster-51324.61964							Cluster-51324.120588			Cluster-51324.123282	Cluster-51324.141259	Cluster-51324.97619				Cluster-51324.51282
Cluster-51324.79572	Cluster-51324.148845	Cluster-51324.93296							Cluster-51324.155341			Cluster-51324.50684	Cluster-51324.71728	Cluster-51324.106265				Cluster-51324.69887
Cluster-51324.80706	Cluster-51324.90354	Cluster-51324.136886							Cluster-51324.84104			Cluster-51324.112688	Cluster-51324.85979	Cluster-51324.90705				Cluster-51324.109092
Cluster-51324.84646	Cluster-51324.91395	Cluster-51324.52637							Cluster-51324.84992			Cluster-51324.94428	Cluster-51324.98156	Cluster-51324.157176				Cluster-51324.177126
Cluster-51324.97856	Cluster-51324.101102	Cluster-51324.109010							Cluster-51324.90779			Cluster-51324.46917	Cluster-51324.93255	Cluster-51324.102780				Cluster-51324.43862
Cluster-51324.68810		Cluster-51324.142678							Cluster-51324.144262			Cluster-51324.89618	Cluster-51324.92375	Cluster-51324.105301				Cluster-51324.133060
Cluster-51324.88861		Cluster-51324.133801							Cluster-51324.39586			Cluster-51324.90817	Cluster-51324.93789	Cluster-51324.140681				Cluster-51324.85976
Cluster-51324.159629		Cluster-51324.156834							Cluster-51324.114163			Cluster-51324.66023	Cluster-51324.127170	Cluster-51324.59223				Cluster-51324.110737
Cluster-51324.82049		Cluster-51324.83139							Cluster-51324.87058			Cluster-51324.86596	Cluster-51324.91937	Cluster-51324.76356				Cluster-51324.143100
Cluster-51324.129588		Cluster-51324.160484							Cluster-51324.99398			Cluster-51324.67175	Cluster-51324.87453	Cluster-51324.24526				Cluster-51324.85530
Cluster-51324.109245		Cluster-51324.133372							Cluster-51324.61966			Cluster-51324.54073	Cluster-51324.83730	Cluster-51324.51371				Cluster-51324.41531
Cluster-51324.95331		Cluster-51324.127640							Cluster-51324.112619			Cluster-51324.100140	Cluster-51324.146622	Cluster-51324.143608				Cluster-51324.108701
Cluster-51324.68559		Cluster-51324.101250							Cluster-51324.100917			Cluster-51324.144137	Cluster-51324.125518	Cluster-51324.94015				Cluster-51324.145735
Cluster-51324.89615		Cluster-51324.90232							Cluster-51324.134188			Cluster-51324.51729	Cluster-51324.102449	Cluster-51324.48506				Cluster-51324.139727
Cluster-51324.118224		Cluster-51324.92071							Cluster-51324.97239			Cluster-51324.152550	Cluster-51324.96709	Cluster-51324.97077				Cluster-51324.54200
Cluster-51324.81865		Cluster-51324.112285							Cluster-51324.92799			Cluster-51324.131898	Cluster-51324.95721	Cluster-51324.83326				Cluster-51324.53127
Cluster-51324.96207		Cluster-51324.72870							Cluster-51324.97425			Cluster-51324.53344	Cluster-51324.54809	Cluster-51324.78106				Cluster-51324.115500
Cluster-51324.99019		Cluster-51324.88778							Cluster-51324.73359			Cluster-51324.53312	Cluster-51324.108516	Cluster-51324.42310				Cluster-51324.101403
Cluster-51324.39201		Cluster-51324.146765							Cluster-51324.94579			Cluster-51324.48926	Cluster-51324.137292	Cluster-51324.90655				Cluster-51324.43858
Cluster-51324.108771		Cluster-51324.102783							Cluster-51324.139844			Cluster-51324.142939	Cluster-51324.78592	Cluster-51324.77852				Cluster-51324.100165
Cluster-51324.104164		Cluster-51324.85593							Cluster-51324.75136			Cluster-51324.52136	Cluster-51324.98739	Cluster-51324.82624				Cluster-51324.170491
Cluster-51324.87604		Cluster-51324.51135							Cluster-51324.52879			Cluster-51324.50868	Cluster-51324.102507	Cluster-51324.78457				Cluster-51324.161138
Cluster-51324.178668		Cluster-51324.90513							Cluster-51324.94792			Cluster-51324.105205	Cluster-51324.93739	Cluster-51324.92937				Cluster-51324.183408
Cluster-51324.89425		Cluster-51324.92988							Cluster-51324.83532			Cluster-51324.80315	Cluster-51324.92886	Cluster-51324.99756				Cluster-51324.162127
Cluster-51324.85432		Cluster-51324.61561							Cluster-51324.124195			Cluster-51324.52324	Cluster-51324.86235	Cluster-51324.56627				Cluster-51324.59204
Cluster-51324.81529		Cluster-51324.14269							Cluster-51324.29305			Cluster-51324.152285	Cluster-51324.64041	Cluster-51324.132061				Cluster-51324.86386
Cluster-51324.111436		Cluster-51324.98038							Cluster-51324.124506			Cluster-51324.143480	Cluster-51324.108325	Cluster-51324.110149				Cluster-51324.102760
Cluster-51324.88439		Cluster-51324.78970							Cluster-51324.178848			Cluster-51324.75799	Cluster-51324.145789	Cluster-51324.82014				Cluster-51324.30047
Cluster-51324.120834		Cluster-51324.63366							Cluster-51324.120051			Cluster-51324.141026	Cluster-51324.112380	Cluster-51324.135319				Cluster-51324.143811
Cluster-51324.141319		Cluster-51324.63698							Cluster-51324.101989			Cluster-51324.143686	Cluster-51324.74626	Cluster-51324.118925				Cluster-51324.86352
Cluster-51324.95920		Cluster-51324.136906							Cluster-51324.104150			Cluster-51324.108631	Cluster-51324.68882	Cluster-51324.111283				Cluster-51324.96565
Cluster-51324.54372		Cluster-51324.88795							Cluster-51324.43494			Cluster-51324.38891	Cluster-51324.110916	Cluster-51324.96079				Cluster-51324.94330
Cluster-51324.57810		Cluster-51324.135715							Cluster-51324.143234			Cluster-51324.87493	Cluster-51324.120547	Cluster-51324.72140				Cluster-51324.70445
Cluster-51324.90353		Cluster-51324.88173							Cluster-51324.145245			Cluster-51324.48593	Cluster-51324.89047	Cluster-51324.158918				Cluster-51324.100630
Cluster-51324.86593		Cluster-51324.63644							Cluster-51324.92444			Cluster-51324.111884	Cluster-51324.92152	Cluster-51324.117179				Cluster-51324.107568
Cluster-51324.96500		Cluster-51324.205887							Cluster-51324.80796			Cluster-51324.62969	Cluster-51324.88807	Cluster-51324.152655				Cluster-51324.63264
Cluster-51324.89543		Cluster-51324.101768							Cluster-51324.32145			Cluster-51324.146156	Cluster-51324.105078	Cluster-51324.107896				Cluster-51324.100069
Cluster-51324.116869		Cluster-51324.87209							Cluster-51324.93674			Cluster-51324.100276	Cluster-51324.123889	Cluster-51324.83385				Cluster-51324.85814
Cluster-51324.88602		Cluster-51324.102459							Cluster-51324.78469			Cluster-51324.146661	Cluster-51324.71979	Cluster-51324.72589				Cluster-51324.99306
Cluster-51324.69781		Cluster-51324.58557							Cluster-51324.41748			Cluster-51324.36453	Cluster-51324.103430	Cluster-51324.112343				Cluster-51324.74382
Cluster-51324.132170		Cluster-51324.90440							Cluster-51324.123494			Cluster-51324.43478	Cluster-51324.94234	Cluster-51324.117864				Cluster-51324.86159
Cluster-51324.93223		Cluster-51324.57659							Cluster-51324.63103			Cluster-51324.166150	Cluster-51324.102650	Cluster-51324.71280				Cluster-51324.53908
Cluster-51324.105830		Cluster-51324.81937							Cluster-51324.52264			Cluster-51324.37637	Cluster-51324.97533	Cluster-51324.96081				Cluster-51324.92985
Cluster-51324.105038		Cluster-51324.172791							Cluster-51324.72792			Cluster-51324.83001	Cluster-51324.100801	Cluster-51324.88298				Cluster-51324.76939
Cluster-51324.87070		Cluster-51324.118325							Cluster-51324.48860			Cluster-51324.98921	Cluster-51324.85882	Cluster-51324.69042				Cluster-51324.109363
Cluster-51324.122057		Cluster-51324.75740							Cluster-51324.96544			Cluster-51324.204766	Cluster-51324.83453	Cluster-51324.133633				Cluster-51324.100230
Cluster-51324.85199		Cluster-51324.107321							Cluster-51324.50657			Cluster-51324.54468	Cluster-51324.93732	Cluster-51324.114380				Cluster-51324.96567
Cluster-51324.96165		Cluster-51324.150739							Cluster-51324.121129			Cluster-51324.97326	Cluster-51324.100599	Cluster-51324.96697				Cluster-51324.78233
Cluster-51324.120797		Cluster-51324.101385							Cluster-51324.67364			Cluster-51324.157145	Cluster-51324.103431	Cluster-51324.94345				Cluster-51324.90555
Cluster-51324.99747		Cluster-51324.88503							Cluster-51324.76961			Cluster-51324.157549	Cluster-51324.67506	Cluster-51324.125804				Cluster-51324.123495
Cluster-51324.79049		Cluster-51324.68617							Cluster-51324.88884			Cluster-51324.160276	Cluster-51324.94686	Cluster-51324.117447				Cluster-51324.93371
Cluster-51324.108149		Cluster-51324.92482							Cluster-51324.96787			Cluster-51324.110126	Cluster-51324.91134	Cluster-51324.113311				Cluster-51324.126443
Cluster-51324.93014		Cluster-51324.87796							Cluster-51324.86760			Cluster-51324.41638	Cluster-51324.117543	Cluster-51324.115417				Cluster-51324.117895
Cluster-51324.125868		Cluster-51324.148112							Cluster-51324.107361			Cluster-51324.100605	Cluster-51324.98719	Cluster-51324.52314				Cluster-51324.88645
Cluster-51324.155537		Cluster-51324.96933							Cluster-51324.94895			Cluster-51324.68322	Cluster-51324.104819	Cluster-51324.103029				Cluster-51324.95139
Cluster-51324.65834		Cluster-51324.65170							Cluster-51324.63788			Cluster-51324.50394	Cluster-51324.102012	Cluster-51324.100649				Cluster-51324.79403
Cluster-51324.99268		Cluster-51324.90607							Cluster-51324.187848			Cluster-51324.105586	Cluster-51324.110246	Cluster-51324.65674				Cluster-51324.93879
Cluster-51324.121708		Cluster-51324.58916							Cluster-51324.43619			Cluster-51324.91933	Cluster-51324.191101	Cluster-51324.130047				Cluster-51324.66529
Cluster-51324.95282		Cluster-51324.101598							Cluster-51324.88960			Cluster-51324.99945	Cluster-51324.93625	Cluster-51324.93399				Cluster-51324.118830
Cluster-51324.80997		Cluster-51324.134242							Cluster-51324.84281			Cluster-51324.105100	Cluster-51324.113488	Cluster-51324.77861				Cluster-51324.89273
Cluster-51324.44436		Cluster-51324.93844							Cluster-51324.94832			Cluster-51324.159982	Cluster-51324.94685	Cluster-51324.105568				Cluster-17802.0
Cluster-51324.99862		Cluster-51324.85681							Cluster-51324.103511			Cluster-51324.32985	Cluster-51324.106384	Cluster-51324.90268				Cluster-51324.51252
Cluster-51324.100862		Cluster-51324.80903							Cluster-51324.162816			Cluster-51324.141167	Cluster-51324.108885	Cluster-51324.129841				Cluster-51324.117497
Cluster-51324.79577		Cluster-51324.115093							Cluster-51324.57993			Cluster-51324.52741	Cluster-51324.127896	Cluster-51324.70930				Cluster-51324.68173
Cluster-51324.59082		Cluster-51324.135535							Cluster-51324.80988			Cluster-51324.92351	Cluster-51324.104232	Cluster-51324.125530				Cluster-51324.93953
Cluster-51324.89654		Cluster-51324.97445							Cluster-51324.135301			Cluster-51324.169163	Cluster-51324.86727	Cluster-51324.133108				Cluster-51324.126429
Cluster-51324.103785		Cluster-51324.116553							Cluster-51324.125310			Cluster-51324.53861	Cluster-51324.181983	Cluster-51324.125508				Cluster-51324.122598
Cluster-51324.43495		Cluster-51324.100955							Cluster-51324.94747			Cluster-51324.39453	Cluster-51324.69840	Cluster-51324.68013				Cluster-51324.134243
Cluster-51324.49225		Cluster-51324.77737							Cluster-51324.53287			Cluster-51324.135230	Cluster-51324.125926	Cluster-51324.154243				Cluster-51324.98589
Cluster-51324.95842		Cluster-51324.86579							Cluster-51324.101129			Cluster-51324.41259	Cluster-51324.130344	Cluster-51324.92278				Cluster-51324.107868
Cluster-51324.91429		Cluster-51324.123890							Cluster-51324.53621			Cluster-51324.114818	Cluster-51324.87020	Cluster-51324.42311				Cluster-51324.95233
Cluster-51324.96440		Cluster-51324.136972							Cluster-51324.141996			Cluster-51324.66149	Cluster-51324.89158	Cluster-51324.103566				Cluster-51324.61738
Cluster-51324.49986		Cluster-51324.105852							Cluster-51324.104948			Cluster-51324.165401	Cluster-51324.90064	Cluster-51324.116991				Cluster-51324.127883
Cluster-51324.88805		Cluster-51324.133529							Cluster-51324.54249			Cluster-51324.133720	Cluster-51324.104342	Cluster-51324.80900				Cluster-51324.61857
Cluster-51324.93777		Cluster-51324.111908							Cluster-51324.98366			Cluster-51324.118168	Cluster-51324.97464	Cluster-51324.99456				Cluster-51324.30696
Cluster-51324.95222		Cluster-51324.90562							Cluster-51324.67156			Cluster-51324.43481	Cluster-51324.92909	Cluster-51324.71143				Cluster-51324.115743
Cluster-51324.111220		Cluster-51324.131703							Cluster-51324.135942			Cluster-51324.128144	Cluster-51324.95185	Cluster-51324.72826				Cluster-51324.36327
Cluster-51324.127308		Cluster-51324.94312							Cluster-51324.144889			Cluster-51324.106591	Cluster-51324.91894	Cluster-51324.68137				Cluster-51324.95733
Cluster-51324.87970		Cluster-51324.72303							Cluster-51324.94653			Cluster-51324.49415	Cluster-51324.95198	Cluster-51324.108482				Cluster-51324.103140
Cluster-51324.104456		Cluster-51324.91015							Cluster-51324.86243			Cluster-51324.52145	Cluster-51324.103051	Cluster-51324.103060				Cluster-51324.107796
Cluster-51324.99704		Cluster-51324.89725							Cluster-51324.16024			Cluster-51324.155368	Cluster-51324.76369	Cluster-51324.99729				Cluster-51324.87259
Cluster-51324.97261		Cluster-51324.100366							Cluster-51324.98311			Cluster-51324.106296	Cluster-51324.122526	Cluster-51324.67424				Cluster-51324.123260
Cluster-51324.112489		Cluster-51324.124097							Cluster-51324.116043			Cluster-51324.143784	Cluster-51324.92366	Cluster-51324.60804				Cluster-51324.70465
Cluster-51324.117103		Cluster-51324.104671							Cluster-51324.101183			Cluster-51324.141610	Cluster-51324.111702	Cluster-51324.144355				Cluster-51324.119044
Cluster-51324.65493		Cluster-51324.71732							Cluster-51324.108374			Cluster-51324.111057	Cluster-51324.89903	Cluster-51324.136302				Cluster-51324.122062
Cluster-51324.94526		Cluster-51324.74261							Cluster-51324.156610			Cluster-51324.175054	Cluster-51324.128091	Cluster-51324.89611				Cluster-51324.97830
Cluster-51324.74480		Cluster-51324.111495							Cluster-51324.127944			Cluster-51324.32986	Cluster-51324.94623	Cluster-51324.80514				Cluster-51324.76696
Cluster-51324.82670		Cluster-51324.71119							Cluster-51324.53898			Cluster-51324.140879	Cluster-51324.111140	Cluster-51324.107092				Cluster-51324.142180
Cluster-51324.114274		Cluster-51324.121765							Cluster-51324.84213			Cluster-51324.173491	Cluster-51324.130137	Cluster-51324.116104				Cluster-51324.94405
Cluster-51324.87073		Cluster-51324.171724							Cluster-51324.34838			Cluster-51324.174612	Cluster-51324.112019	Cluster-51324.9493				Cluster-51324.83388
Cluster-51324.64195		Cluster-51324.110842							Cluster-51324.64459			Cluster-51324.150582	Cluster-51324.95251	Cluster-51324.66992				Cluster-51324.126592
Cluster-51324.87420		Cluster-51324.137823							Cluster-51324.91723			Cluster-51324.47667	Cluster-51324.72037	Cluster-51324.51594				Cluster-51324.132801
Cluster-51324.38438		Cluster-51324.79211							Cluster-51324.103194			Cluster-51324.161052	Cluster-51324.95980	Cluster-51324.138195				Cluster-51324.115419
Cluster-51324.76441		Cluster-51324.83314							Cluster-51324.90792			Cluster-51324.21840	Cluster-51324.101911	Cluster-51324.101559				Cluster-51324.105178
Cluster-51324.138197		Cluster-51324.59451							Cluster-51324.136369			Cluster-51324.40272	Cluster-51324.166308	Cluster-51324.135542				Cluster-51324.125582
Cluster-51324.182796		Cluster-51324.91954							Cluster-51324.98641			Cluster-51324.152300	Cluster-51324.82860	Cluster-51324.77480				Cluster-51324.74066
Cluster-51324.62116		Cluster-51324.100219							Cluster-51324.38455			Cluster-51324.99129	Cluster-51324.49623	Cluster-51324.111705				Cluster-51324.106348
Cluster-51324.88832		Cluster-51324.58437							Cluster-51324.147738			Cluster-51324.90185	Cluster-51324.86292	Cluster-51324.90382				Cluster-51324.92649
Cluster-51324.81049		Cluster-51324.69475							Cluster-51324.84112			Cluster-51324.53829	Cluster-51324.80967	Cluster-51324.96590				Cluster-51324.97626
Cluster-51324.43126		Cluster-51324.70967							Cluster-51324.52201			Cluster-51324.142332	Cluster-51324.86988	Cluster-51324.99700				Cluster-51324.78605
Cluster-51324.101227		Cluster-51324.80015							Cluster-51324.41508			Cluster-51324.76317	Cluster-51324.94647	Cluster-51324.167420				Cluster-51324.97269
Cluster-51324.111024		Cluster-51324.67699							Cluster-51324.109176			Cluster-51324.70078	Cluster-51324.147042	Cluster-51324.105018				Cluster-51324.116203
Cluster-51324.106465		Cluster-51324.69890							Cluster-51324.115754			Cluster-51324.141399	Cluster-51324.82307	Cluster-51324.58425				Cluster-51324.77920
Cluster-51324.101047		Cluster-51324.114193							Cluster-51324.125054			Cluster-51324.144180	Cluster-51324.96791	Cluster-51324.106768				Cluster-51324.92686
Cluster-51324.30489		Cluster-51324.60619							Cluster-51324.112063			Cluster-51324.66150	Cluster-51324.99137	Cluster-51324.163488				Cluster-51324.40895
Cluster-51324.79739		Cluster-51324.89856							Cluster-51324.108075			Cluster-51324.65623	Cluster-51324.97083	Cluster-51324.76801				Cluster-51324.51254
Cluster-51324.87982		Cluster-51324.89165							Cluster-51324.129145			Cluster-51324.83985	Cluster-51324.39861	Cluster-51324.105580				Cluster-51324.91891
Cluster-51324.100607		Cluster-51324.60507							Cluster-51324.47820			Cluster-51324.157417	Cluster-51324.102198	Cluster-51324.76477				Cluster-51324.100811
Cluster-51324.82465		Cluster-51324.127499							Cluster-51324.92194			Cluster-51324.164528	Cluster-51324.88830	Cluster-51324.83277				Cluster-51324.60217
Cluster-51324.83998		Cluster-51324.39523							Cluster-51324.108572			Cluster-51324.152288	Cluster-51324.54481	Cluster-51324.109094				Cluster-51324.148343
Cluster-51324.96930		Cluster-51324.165238							Cluster-51324.181345			Cluster-51324.84006	Cluster-51324.119769	Cluster-51324.61183				Cluster-51324.79985
Cluster-51324.95441		Cluster-51324.66236							Cluster-51324.142838			Cluster-51324.66501	Cluster-51324.95916	Cluster-51324.116052				Cluster-51324.82339
Cluster-51324.59669		Cluster-51324.96159							Cluster-51324.96370			Cluster-51324.6095	Cluster-51324.93319	Cluster-51324.60118				Cluster-51324.122615
Cluster-51324.123701		Cluster-51324.138668							Cluster-51324.38558			Cluster-51324.166512	Cluster-51324.112117	Cluster-51324.96984				Cluster-51324.88871
Cluster-51324.115674		Cluster-51324.110603							Cluster-51324.100891			Cluster-51324.172356	Cluster-51324.93540	Cluster-51324.98310				Cluster-51324.114565
Cluster-51324.91436		Cluster-51324.172058							Cluster-51324.90108			Cluster-51324.149319	Cluster-51324.92410	Cluster-51324.85306				Cluster-51324.128095
Cluster-51324.76778		Cluster-51324.112280							Cluster-51324.81374			Cluster-51324.89066	Cluster-51324.89765	Cluster-51324.112708				Cluster-51324.114665
Cluster-51324.98140		Cluster-51324.86513							Cluster-51324.99973			Cluster-51324.159875	Cluster-51324.130760	Cluster-51324.94495				Cluster-51324.61001
Cluster-51324.79537		Cluster-51324.93186							Cluster-51324.128500			Cluster-51324.129992	Cluster-51324.91950	Cluster-51324.156765				Cluster-51324.91446
Cluster-51324.98142		Cluster-51324.107565							Cluster-51324.83367			Cluster-51324.62640	Cluster-51324.88390	Cluster-51324.68014				Cluster-51324.82562
Cluster-51324.102445		Cluster-51324.66209							Cluster-51324.118469			Cluster-51324.38686	Cluster-51324.76810	Cluster-51324.105824				Cluster-51324.115418
Cluster-51324.100749		Cluster-51324.107398							Cluster-51324.151014			Cluster-51324.139595	Cluster-51324.83830	Cluster-51324.32491				Cluster-51324.109190
Cluster-51324.77201		Cluster-51324.109382							Cluster-51324.15179			Cluster-51324.147945	Cluster-51324.93810	Cluster-51324.92305				Cluster-51324.109780
Cluster-51324.119397		Cluster-51324.120649							Cluster-51324.34225			Cluster-51324.79818	Cluster-51324.142914	Cluster-51324.91119				Cluster-51324.116425
Cluster-51324.96571		Cluster-51324.108403							Cluster-51324.139678			Cluster-51324.31095	Cluster-51324.94950	Cluster-51324.41466				Cluster-51324.143775
Cluster-51324.98446		Cluster-51324.87746							Cluster-51324.91585			Cluster-51324.38892	Cluster-51324.127512	Cluster-51324.119399				Cluster-51324.81241
Cluster-51324.136762		Cluster-51324.80039							Cluster-51324.198557			Cluster-51324.119449	Cluster-51324.116849	Cluster-51324.86558				Cluster-51324.132428
Cluster-51324.101304		Cluster-51324.41119							Cluster-51324.80723			Cluster-51324.90586	Cluster-51324.91318	Cluster-51324.101457				Cluster-51324.123119
Cluster-51324.77666		Cluster-51324.116688							Cluster-51324.111596			Cluster-51324.113335	Cluster-51324.101893	Cluster-51324.113178				Cluster-51324.128680
Cluster-51324.88989		Cluster-51324.112550							Cluster-51324.120130			Cluster-51324.150395	Cluster-51324.98304	Cluster-51324.97122				Cluster-51324.67706
Cluster-51324.142907		Cluster-51324.85556							Cluster-51324.139021			Cluster-51324.70757	Cluster-51324.79452	Cluster-51324.108934				Cluster-51324.70293
Cluster-51324.58123		Cluster-51324.100786							Cluster-51324.143066			Cluster-51324.115805	Cluster-51324.100756	Cluster-51324.116351				Cluster-51324.116765
Cluster-51324.96161		Cluster-51324.86597							Cluster-51324.117234			Cluster-51324.42332	Cluster-51324.66404	Cluster-51324.92350				Cluster-51324.117495
Cluster-51324.107209		Cluster-51324.157975							Cluster-51324.51526			Cluster-51324.45126	Cluster-51324.94078	Cluster-51324.100627				Cluster-51324.90473
Cluster-51324.144252		Cluster-51324.129357							Cluster-51324.90836			Cluster-51324.101207	Cluster-51324.93533	Cluster-51324.145421				Cluster-51324.77012
Cluster-51324.91030		Cluster-51324.143058							Cluster-51324.86978			Cluster-51324.100579	Cluster-51324.85975	Cluster-51324.163074				Cluster-51324.50840
Cluster-51324.124911		Cluster-51324.91152							Cluster-51324.51256			Cluster-51324.32001	Cluster-51324.143184	Cluster-51324.49591				Cluster-51324.93476
Cluster-51324.112793		Cluster-51324.176928							Cluster-51324.101484			Cluster-51324.120801	Cluster-51324.73294	Cluster-51324.147310				Cluster-51324.67155
Cluster-51324.180756		Cluster-51324.90651							Cluster-51324.100768			Cluster-51324.144415	Cluster-51324.92087	Cluster-51324.92956				Cluster-51324.102070
Cluster-51324.143160		Cluster-51324.95654							Cluster-51324.83389			Cluster-51324.51187	Cluster-51324.97182	Cluster-51324.78910				Cluster-51324.50892
Cluster-51324.115969		Cluster-51324.152873							Cluster-51324.88517			Cluster-51324.161341	Cluster-51324.90238	Cluster-51324.82205				Cluster-51324.82281
Cluster-51324.108126		Cluster-51324.78685							Cluster-51324.139039			Cluster-51324.94429	Cluster-51324.73550	Cluster-51324.85616				Cluster-51324.96182
Cluster-51324.53145		Cluster-51324.112996							Cluster-51324.35518			Cluster-51324.155677	Cluster-51324.94237	Cluster-51324.128596				Cluster-51324.86054
Cluster-51324.95052		Cluster-51324.152621							Cluster-51324.135240			Cluster-51324.111287	Cluster-51324.111700	Cluster-51324.104045				Cluster-51324.107939
Cluster-51324.128331		Cluster-51324.91011							Cluster-51324.120910			Cluster-51324.127405	Cluster-51324.99846	Cluster-51324.145895				Cluster-51324.115062
Cluster-51324.16616		Cluster-51324.11428							Cluster-51324.76012			Cluster-51324.111528	Cluster-51324.90736	Cluster-51324.107766				Cluster-51324.101931
Cluster-51324.117950		Cluster-51324.140557							Cluster-51324.95469			Cluster-51324.138279	Cluster-51324.90965	Cluster-51324.126418				Cluster-51324.177655
Cluster-51324.102725		Cluster-51324.73935							Cluster-51324.120302			Cluster-51324.165203	Cluster-51324.95568	Cluster-51324.86546				Cluster-51324.102600
Cluster-51324.144085		Cluster-51324.66379							Cluster-51324.144687			Cluster-51324.39463	Cluster-51324.61588	Cluster-51324.35800				Cluster-51324.135015
Cluster-51324.118498		Cluster-51324.77802							Cluster-51324.19047			Cluster-51324.52966	Cluster-51324.98034	Cluster-51324.121907				Cluster-51324.105737
Cluster-51324.94994		Cluster-51324.96660							Cluster-51324.57159			Cluster-51324.141218	Cluster-51324.77370	Cluster-51324.38256				Cluster-51324.81888
Cluster-51324.145425		Cluster-51324.102943							Cluster-51324.44517			Cluster-51324.148016	Cluster-51324.94601	Cluster-51324.127696				Cluster-51324.107013
Cluster-51324.130736		Cluster-51324.64712							Cluster-51324.120689			Cluster-51324.53386	Cluster-51324.94313	Cluster-51324.144008				Cluster-51324.100479
Cluster-51324.201544		Cluster-51324.66633							Cluster-51324.54806			Cluster-51324.53702	Cluster-51324.82317	Cluster-51324.95026				Cluster-51324.90325
Cluster-51324.85201		Cluster-51324.111676							Cluster-51324.79539			Cluster-51324.70881	Cluster-51324.91895	Cluster-51324.104181				Cluster-51324.155204
Cluster-51324.120802		Cluster-51324.106700							Cluster-51324.94475			Cluster-51324.141421	Cluster-51324.95919	Cluster-51324.127990				Cluster-51324.130922
Cluster-51324.144146		Cluster-51324.77136							Cluster-51324.133528			Cluster-51324.150730	Cluster-51324.89238	Cluster-51324.120049				Cluster-51324.167163
Cluster-51324.150667		Cluster-51324.113419							Cluster-51324.144346			Cluster-51324.89592	Cluster-51324.91211	Cluster-51324.79556				Cluster-51324.96376
Cluster-51324.88062		Cluster-51324.77634							Cluster-51324.78723			Cluster-51324.101133	Cluster-51324.89450	Cluster-51324.63014				Cluster-51324.86409
Cluster-51324.86457		Cluster-51324.129656							Cluster-51324.77955			Cluster-51324.158404	Cluster-51324.117916	Cluster-51324.129300				Cluster-51324.73725
Cluster-51324.101120		Cluster-51324.60415							Cluster-51324.135058			Cluster-51324.141090	Cluster-51324.123771	Cluster-51324.98861				Cluster-51324.113572
Cluster-51324.53130		Cluster-51324.97813							Cluster-51324.45411			Cluster-51324.87889	Cluster-51324.105914	Cluster-51324.126704				Cluster-51324.130838
Cluster-51324.117695		Cluster-51324.104549							Cluster-51324.52396			Cluster-51324.92089	Cluster-51324.72255	Cluster-51324.108301				Cluster-51324.91530
Cluster-51324.74484		Cluster-51324.59725							Cluster-51324.146488			Cluster-51324.54192	Cluster-51324.108609	Cluster-51324.99699				Cluster-51324.136217
Cluster-51324.87519		Cluster-51324.76350							Cluster-51324.93817			Cluster-51324.39604	Cluster-51324.144458	Cluster-51324.53332				Cluster-51324.71406
Cluster-51324.148875		Cluster-51324.91131							Cluster-51324.162817			Cluster-51324.49985	Cluster-51324.105016	Cluster-51324.135832				Cluster-51324.89360
Cluster-51324.99379		Cluster-51324.87210							Cluster-51324.90767			Cluster-51324.142413	Cluster-51324.95048	Cluster-51324.154577				Cluster-51324.96375
Cluster-51324.89966		Cluster-51324.94459							Cluster-51324.94218			Cluster-51324.172358	Cluster-51324.101072	Cluster-51324.51969				Cluster-51324.96420
Cluster-51324.164195		Cluster-51324.120608							Cluster-51324.54529			Cluster-51324.103070	Cluster-51324.94929	Cluster-51324.73922				Cluster-51324.105715
Cluster-51324.53901		Cluster-51324.74573							Cluster-51324.137933			Cluster-51324.43363	Cluster-51324.103084	Cluster-51324.98535				Cluster-51324.171021
Cluster-51324.142774		Cluster-51324.98354							Cluster-51324.88449			Cluster-51324.134670	Cluster-51324.111181	Cluster-51324.133395				Cluster-51324.99164
Cluster-51324.83947		Cluster-51324.113886							Cluster-51324.92808			Cluster-51324.36885	Cluster-51324.58439	Cluster-51324.90844				Cluster-51324.78554
Cluster-51324.132392		Cluster-51324.125782							Cluster-51324.67703			Cluster-51324.54387	Cluster-51324.95256	Cluster-51324.139632				Cluster-51324.15167
Cluster-51324.107734		Cluster-51324.93316							Cluster-51324.156608			Cluster-51324.144224	Cluster-51324.89026	Cluster-51324.60553				Cluster-51324.77572
Cluster-51324.156352		Cluster-51324.92567							Cluster-51324.87056			Cluster-51324.97440	Cluster-51324.101662	Cluster-51324.112943				Cluster-51324.110202
Cluster-51324.63705		Cluster-51324.124733							Cluster-51324.64419			Cluster-51324.53756	Cluster-51324.92434	Cluster-51324.92200				Cluster-51324.90760
Cluster-51324.165935		Cluster-51324.70043							Cluster-51324.66970			Cluster-51324.34674	Cluster-51324.100139	Cluster-51324.70271				Cluster-51324.20387
Cluster-51324.96270		Cluster-51324.105275							Cluster-51324.44712			Cluster-51324.33917	Cluster-51324.93190	Cluster-51324.88792				Cluster-51324.100268
Cluster-51324.149898		Cluster-51324.105919							Cluster-51324.114887			Cluster-51324.159351	Cluster-51324.73811	Cluster-51324.155516				Cluster-51324.150204
Cluster-51324.93824		Cluster-51324.78291							Cluster-51324.85895			Cluster-51324.124735	Cluster-51324.110915	Cluster-51324.100351				Cluster-51324.102544
Cluster-51324.105811		Cluster-51324.114147							Cluster-51324.102632			Cluster-51324.148060	Cluster-51324.95074	Cluster-51324.42440				Cluster-51324.83855
Cluster-51324.97205		Cluster-51324.102492							Cluster-51324.99658			Cluster-51324.149079	Cluster-51324.61550	Cluster-51324.132247				Cluster-51324.45708
Cluster-51324.121122		Cluster-51324.109364							Cluster-51324.56133			Cluster-51324.141047	Cluster-51324.93235	Cluster-51324.152802				Cluster-51324.156645
Cluster-51324.96397		Cluster-51324.122471							Cluster-51324.39262			Cluster-51324.35557	Cluster-51324.97842	Cluster-51324.178477				Cluster-51324.63859
Cluster-51324.118186		Cluster-51324.10230							Cluster-51324.53682			Cluster-51324.40695	Cluster-51324.92334	Cluster-51324.121418				Cluster-51324.90423
Cluster-51324.115580		Cluster-51324.158442							Cluster-51324.120710			Cluster-51324.97538	Cluster-51324.108186	Cluster-51324.102208				Cluster-51324.103629
Cluster-51324.88463		Cluster-51324.119862							Cluster-51324.135938			Cluster-51324.73549	Cluster-51324.96623	Cluster-51324.85667				Cluster-51324.87223
Cluster-51324.66937		Cluster-51324.87582							Cluster-51324.46863			Cluster-51324.140880	Cluster-51324.91841	Cluster-51324.55495				Cluster-51324.80230
Cluster-51324.103443		Cluster-51324.60332							Cluster-51324.88312			Cluster-51324.50379	Cluster-51324.85674	Cluster-51324.111160				Cluster-51324.101575
Cluster-51324.99463		Cluster-51324.59398							Cluster-51324.99685			Cluster-51324.53268	Cluster-51324.152943	Cluster-51324.68545				Cluster-51324.80307
Cluster-51324.97299		Cluster-51324.73900							Cluster-51324.15520			Cluster-51324.148137	Cluster-51324.94917	Cluster-51324.52628				Cluster-51324.59841
Cluster-51324.75168		Cluster-51324.101903							Cluster-51324.91352			Cluster-51324.101288	Cluster-51324.105552	Cluster-51324.118544				Cluster-51324.90918
Cluster-51324.92701		Cluster-51324.44183							Cluster-51324.56173			Cluster-51324.115562	Cluster-51324.133077	Cluster-51324.131604				Cluster-51324.82558
Cluster-51324.161168		Cluster-51324.11328							Cluster-51324.87063			Cluster-51324.143568	Cluster-51324.88144	Cluster-51324.97439				Cluster-51324.117799
Cluster-51324.147018		Cluster-51324.118424							Cluster-51324.94354			Cluster-51324.90660	Cluster-51324.99793	Cluster-51324.88350				Cluster-51324.129694
Cluster-51324.93379		Cluster-51324.63485							Cluster-51324.198553			Cluster-51324.143926	Cluster-51324.74215	Cluster-51324.82170				Cluster-51324.100504
Cluster-51324.115464		Cluster-51324.89210							Cluster-51324.115567			Cluster-51324.156097	Cluster-51324.88617	Cluster-51324.100682				Cluster-51324.44216
Cluster-51324.110644		Cluster-51324.146496							Cluster-51324.91121			Cluster-51324.155759	Cluster-51324.131922	Cluster-51324.94974				Cluster-51324.92296
Cluster-51324.106678		Cluster-51324.66147							Cluster-51324.93702			Cluster-51324.86875	Cluster-51324.93310	Cluster-51324.117329				Cluster-51324.96596
Cluster-51324.82736		Cluster-51324.81054							Cluster-51324.39893			Cluster-51324.95531	Cluster-51324.95820	Cluster-51324.79789				Cluster-51324.117536
Cluster-51324.98722		Cluster-51324.102143							Cluster-51324.61734			Cluster-51324.207012	Cluster-51324.79569	Cluster-51324.88694				Cluster-51324.94222
Cluster-51324.101447		Cluster-51324.58803							Cluster-51324.91321			Cluster-51324.93890	Cluster-51324.95836	Cluster-51324.87850				Cluster-51324.72838
Cluster-51324.94577		Cluster-51324.102030							Cluster-51324.66313			Cluster-51324.115421	Cluster-51324.72014	Cluster-51324.114271				Cluster-51324.114589
Cluster-51324.140147		Cluster-51324.102496							Cluster-51324.57266			Cluster-51324.93539	Cluster-51324.92085	Cluster-51324.110586				Cluster-51324.87100
Cluster-51324.42342		Cluster-51324.56397							Cluster-51324.95335			Cluster-51324.94957	Cluster-51324.91464	Cluster-51324.61423				Cluster-51324.51376
Cluster-51324.108025		Cluster-51324.75201							Cluster-51324.125484			Cluster-51324.74130	Cluster-51324.105395	Cluster-51324.93734				Cluster-51324.139246
Cluster-51324.132279		Cluster-51324.94264							Cluster-51324.67695			Cluster-51324.53586	Cluster-51324.53280	Cluster-51324.95173				Cluster-51324.87747
Cluster-51324.120530		Cluster-51324.54031							Cluster-51324.144187			Cluster-51324.132363	Cluster-51324.93854	Cluster-51324.115581				Cluster-51324.78017
Cluster-51324.106505		Cluster-51324.92696							Cluster-51324.68413			Cluster-51324.49154	Cluster-51324.96928	Cluster-51324.138578				Cluster-51324.72997
Cluster-51324.92202		Cluster-51324.90489							Cluster-51324.112372			Cluster-51324.70347	Cluster-51324.92268	Cluster-51324.100941				Cluster-51324.68701
Cluster-51324.102730		Cluster-51324.106879							Cluster-51324.9720			Cluster-51324.90680	Cluster-51324.99056	Cluster-51324.139488				Cluster-51324.74078
Cluster-51324.120638		Cluster-51324.103827							Cluster-51324.124513			Cluster-51324.50980	Cluster-51324.94803	Cluster-51324.69628				Cluster-51324.53263
Cluster-51324.106711		Cluster-51324.111583							Cluster-51324.158483			Cluster-51324.154983	Cluster-51324.99682	Cluster-51324.92976				Cluster-51324.101790
Cluster-51324.91019		Cluster-51324.92355							Cluster-51324.84671			Cluster-51324.136940	Cluster-51324.94630	Cluster-51324.66534				Cluster-51324.90425
Cluster-51324.90599		Cluster-51324.63182							Cluster-51324.99775			Cluster-51324.81423	Cluster-51324.107975	Cluster-51324.107445				Cluster-51324.88828
Cluster-51324.93727		Cluster-51324.98204							Cluster-51324.146211			Cluster-51324.47851	Cluster-51324.95765	Cluster-51324.63273				Cluster-51324.155210
Cluster-51324.96289		Cluster-51324.124512							Cluster-51324.36883			Cluster-51324.49173	Cluster-51324.93689	Cluster-51324.85676				Cluster-51324.110247
Cluster-51324.59530		Cluster-51324.74703							Cluster-51324.143653			Cluster-51324.54565	Cluster-51324.62073	Cluster-51324.108143				Cluster-51324.100350
Cluster-51324.108749		Cluster-51324.140657							Cluster-51324.94179			Cluster-51324.151136	Cluster-51324.56915	Cluster-51324.130052				Cluster-51324.48654
Cluster-51324.98023		Cluster-51324.67570							Cluster-51324.115744			Cluster-51324.110393	Cluster-51324.80153	Cluster-51324.102448				Cluster-51324.101510
Cluster-51324.151034		Cluster-51324.138951							Cluster-51324.76316			Cluster-51324.155070	Cluster-51324.91476	Cluster-51324.54214				Cluster-51324.85416
Cluster-51324.94203		Cluster-51324.72780							Cluster-51324.127563			Cluster-51324.172353	Cluster-51324.80998	Cluster-51324.97080				Cluster-51324.103193
Cluster-51324.141112		Cluster-51324.15030							Cluster-51324.154131			Cluster-51324.103604	Cluster-51324.94168	Cluster-51324.125387				Cluster-51324.117350
Cluster-51324.39326		Cluster-51324.91719							Cluster-51324.102029			Cluster-51324.113914	Cluster-51324.95493	Cluster-51324.140515				Cluster-51324.83364
Cluster-51324.93995		Cluster-51324.79418							Cluster-51324.153520			Cluster-51324.131756	Cluster-51324.92523	Cluster-51324.154917				Cluster-51324.102008
Cluster-51324.102331		Cluster-51324.62882							Cluster-51324.140996			Cluster-51324.103154	Cluster-51324.107383	Cluster-51324.77052				Cluster-51324.191166
Cluster-51324.81403		Cluster-51324.126530							Cluster-51324.129453			Cluster-51324.125515	Cluster-51324.121982	Cluster-51324.32824				Cluster-51324.91729
Cluster-51324.60068		Cluster-51324.105687							Cluster-51324.90809			Cluster-51324.42100	Cluster-51324.95508	Cluster-51324.145815				Cluster-51324.38412
Cluster-51324.84593		Cluster-51324.113585							Cluster-51324.157699			Cluster-51324.97814	Cluster-51324.106200	Cluster-51324.62767				Cluster-51324.132163
Cluster-51324.78778		Cluster-51324.99853							Cluster-51324.110228			Cluster-51324.87892	Cluster-51324.105615	Cluster-51324.91632				Cluster-51324.85141
Cluster-51324.95415		Cluster-51324.121722							Cluster-51324.45363			Cluster-51324.54668	Cluster-51324.99802	Cluster-51324.107026				Cluster-51324.103096
Cluster-51324.98331		Cluster-51324.75920							Cluster-51324.14991			Cluster-51324.53689	Cluster-51324.86605	Cluster-51324.18073				Cluster-51324.88676
Cluster-51324.66882		Cluster-51324.89060							Cluster-51324.111930			Cluster-51324.117987	Cluster-51324.128210	Cluster-51324.79210				Cluster-51324.169761
Cluster-51324.88990		Cluster-51324.94582							Cluster-51324.89597			Cluster-51324.115886	Cluster-51324.93869	Cluster-51324.88863				Cluster-51324.163526
Cluster-51324.100425		Cluster-51324.96299							Cluster-51324.97691			Cluster-51324.74302	Cluster-51324.97534	Cluster-51324.112149				Cluster-51324.134260
Cluster-51324.69194		Cluster-51324.89613							Cluster-51324.123382			Cluster-51324.51053	Cluster-51324.151810	Cluster-51324.88358				Cluster-51324.107153
Cluster-51324.83111		Cluster-51324.92053							Cluster-51324.142147			Cluster-51324.92706	Cluster-51324.107313	Cluster-51324.81362				Cluster-51324.142593
Cluster-51324.81386		Cluster-51324.77504							Cluster-51324.48152			Cluster-51324.161916	Cluster-51324.96691	Cluster-51324.93396				Cluster-51324.133026
Cluster-51324.40976		Cluster-51324.88177							Cluster-51324.144086			Cluster-51324.56479	Cluster-51324.93703	Cluster-51324.103101				Cluster-51324.114174
Cluster-51324.94442		Cluster-51324.86358							Cluster-51324.106159			Cluster-51324.100021	Cluster-51324.112054	Cluster-51324.129332				Cluster-51324.80074
Cluster-51324.141954		Cluster-51324.97766							Cluster-51324.22230			Cluster-51324.52775	Cluster-51324.63326	Cluster-51324.94100				Cluster-51324.94672
Cluster-51324.105454		Cluster-51324.59262							Cluster-51324.40341			Cluster-51324.150824	Cluster-51324.92528	Cluster-51324.108136				Cluster-51324.64272
Cluster-51324.83408		Cluster-51324.84286							Cluster-51324.112798			Cluster-51324.37236	Cluster-51324.96085	Cluster-51324.78414				Cluster-51324.157811
Cluster-51324.136982		Cluster-51324.132655							Cluster-51324.157917			Cluster-51324.49109	Cluster-51324.83394	Cluster-51324.131152				Cluster-51324.120831
Cluster-51324.113253		Cluster-51324.98566							Cluster-51324.109526			Cluster-51324.126167	Cluster-51324.105870	Cluster-51324.153714				Cluster-51324.56141
Cluster-51324.52856		Cluster-51324.124084							Cluster-51324.97089			Cluster-51324.151579	Cluster-51324.76531	Cluster-51324.138200				Cluster-51324.140838
Cluster-51324.27781		Cluster-51324.105304							Cluster-51324.47451			Cluster-51324.141797	Cluster-51324.101244	Cluster-51324.90708				Cluster-51324.32095
Cluster-51324.193940		Cluster-51324.94869							Cluster-51324.35866			Cluster-51324.123979	Cluster-51324.90962	Cluster-51324.122961				Cluster-51324.47258
Cluster-51324.81296		Cluster-51324.117647							Cluster-51324.63235			Cluster-51324.130712	Cluster-51324.90034	Cluster-51324.108858				Cluster-51324.107923
Cluster-51324.100668		Cluster-51324.149081							Cluster-51324.129148			Cluster-51324.101568	Cluster-51324.102280	Cluster-51324.110123				Cluster-51324.74321
Cluster-51324.94131		Cluster-51324.135494							Cluster-51324.53412			Cluster-51324.173679	Cluster-51324.78611	Cluster-51324.116972				Cluster-51324.95073
Cluster-51324.131031		Cluster-51324.195876							Cluster-51324.64434			Cluster-51324.102009	Cluster-51324.99654	Cluster-51324.106536				Cluster-51324.87946
Cluster-51324.51703		Cluster-51324.161037							Cluster-51324.65691			Cluster-51324.80635	Cluster-51324.121358	Cluster-51324.67440				Cluster-51324.65215
Cluster-51324.134399		Cluster-51324.168469							Cluster-51324.166423			Cluster-51324.6496	Cluster-51324.95318	Cluster-51324.81612				Cluster-51324.108347
Cluster-51324.53097		Cluster-51324.80786							Cluster-51324.122821			Cluster-51324.141734	Cluster-51324.105938	Cluster-51324.84115				Cluster-51324.90521
Cluster-51324.71897		Cluster-51324.110810							Cluster-51324.118036			Cluster-51324.154555	Cluster-51324.93018	Cluster-51324.22757				Cluster-51324.75961
Cluster-51324.109706		Cluster-51324.93590							Cluster-51324.95728			Cluster-51324.139489	Cluster-51324.97004	Cluster-51324.114366				Cluster-51324.46576
Cluster-51324.113024		Cluster-51324.73040							Cluster-51324.84444			Cluster-51324.102064	Cluster-51324.97480	Cluster-51324.84976				Cluster-51324.97288
Cluster-51324.117057		Cluster-51324.116309							Cluster-51324.102769			Cluster-51324.158577	Cluster-51324.95772	Cluster-51324.98525				Cluster-51324.96695
Cluster-51324.107308		Cluster-51324.151015							Cluster-51324.100008			Cluster-51324.59964	Cluster-51324.90225	Cluster-51324.52221				Cluster-51324.30850
Cluster-51324.96171		Cluster-51324.73433							Cluster-51324.101073			Cluster-51324.112274	Cluster-51324.81973	Cluster-51324.171828				Cluster-51324.130159
Cluster-51324.52542		Cluster-51324.155942							Cluster-51324.103398			Cluster-51324.49567	Cluster-51324.99107	Cluster-51324.75169				Cluster-51324.139682
Cluster-51324.65604		Cluster-51324.73705							Cluster-51324.117036			Cluster-51324.91397	Cluster-51324.94159	Cluster-51324.114417				Cluster-51324.75639
Cluster-51324.99130		Cluster-51324.65307							Cluster-51324.112746			Cluster-51324.67783	Cluster-51324.89764	Cluster-51324.186649				Cluster-51324.99488
Cluster-51324.51151		Cluster-51324.97213							Cluster-51324.169829			Cluster-51324.89013	Cluster-51324.89620	Cluster-51324.126912				Cluster-51324.128970
Cluster-51324.160736		Cluster-51324.60529							Cluster-51324.44711			Cluster-51324.86659	Cluster-51324.91007	Cluster-51324.144980				Cluster-51324.107540
Cluster-51324.193900		Cluster-51324.112754							Cluster-51324.26773			Cluster-51324.67478	Cluster-51324.135890	Cluster-51324.123307				Cluster-51324.51786
Cluster-51324.113793		Cluster-51324.126583							Cluster-51324.14223			Cluster-51324.103998	Cluster-51324.81909	Cluster-51324.89172				Cluster-51324.129592
Cluster-51324.104174		Cluster-51324.132469							Cluster-51324.150159			Cluster-51324.99320	Cluster-51324.91685	Cluster-51324.154916				Cluster-51324.140901
Cluster-51324.139787		Cluster-51324.53246							Cluster-51324.89219			Cluster-51324.51584	Cluster-51324.98643	Cluster-51324.143453				Cluster-51324.107660
Cluster-51324.116578		Cluster-51324.88262							Cluster-51324.158842			Cluster-51324.51544	Cluster-51324.96201	Cluster-51324.96609				Cluster-51324.78921
Cluster-51324.116882		Cluster-51324.100972							Cluster-51324.103282			Cluster-51324.45810	Cluster-51324.119318	Cluster-51324.117218				Cluster-51324.102713
Cluster-51324.113274		Cluster-51324.94781							Cluster-51324.48256			Cluster-51324.36454	Cluster-51324.83663	Cluster-51324.126192				Cluster-51324.112136
Cluster-51324.14066		Cluster-51324.142546							Cluster-51324.90685			Cluster-51324.18425	Cluster-51324.5993	Cluster-51324.91319				Cluster-51324.98965
Cluster-51324.34856		Cluster-51324.93054							Cluster-51324.144507			Cluster-51324.81615	Cluster-51324.66109	Cluster-51324.62674				Cluster-51324.92685
Cluster-51324.24135		Cluster-51324.110214							Cluster-51324.93784			Cluster-51324.142634	Cluster-51324.94674	Cluster-51324.107878				Cluster-51324.77926
Cluster-51324.103134		Cluster-51324.79845							Cluster-51324.86006			Cluster-51324.160406	Cluster-51324.64062	Cluster-51324.150510				Cluster-51324.35775
Cluster-51324.89352		Cluster-51324.154446							Cluster-51324.52465			Cluster-51324.66210	Cluster-51324.100596	Cluster-51324.98829				Cluster-51324.94509
Cluster-51324.165276		Cluster-51324.106247							Cluster-51324.64420			Cluster-51324.56576	Cluster-51324.96178	Cluster-51324.18074				Cluster-51324.91619
Cluster-51324.98640		Cluster-51324.203927							Cluster-51324.110650			Cluster-51324.141860	Cluster-51324.93008	Cluster-51324.84916				Cluster-51324.72047
Cluster-51324.98541		Cluster-51324.99936							Cluster-51324.112634			Cluster-51324.92348	Cluster-51324.98650	Cluster-51324.48609				Cluster-51324.73539
Cluster-51324.86882		Cluster-51324.137611							Cluster-51324.142330			Cluster-51324.69348	Cluster-51324.116166	Cluster-51324.113280				Cluster-51324.77980
Cluster-51324.94351		Cluster-51324.90626							Cluster-51324.104875			Cluster-51324.121524	Cluster-51324.111297	Cluster-51324.64580				Cluster-51324.128908
Cluster-51324.36082		Cluster-51324.122540							Cluster-51324.103037			Cluster-51324.83897	Cluster-51324.98076	Cluster-51324.105529				Cluster-51324.100523
Cluster-51324.74377		Cluster-51324.87976							Cluster-51324.53204			Cluster-51324.141749	Cluster-51324.133460	Cluster-51324.148099				Cluster-51324.81240
Cluster-51324.73565		Cluster-51324.97100							Cluster-51324.48861			Cluster-51324.146132	Cluster-51324.94233	Cluster-51324.95207				Cluster-51324.107869
Cluster-51324.99038		Cluster-51324.92719							Cluster-51324.102436			Cluster-51324.52619	Cluster-51324.115356	Cluster-51324.125644				Cluster-51324.112338
Cluster-51324.89879		Cluster-51324.47750							Cluster-51324.108297			Cluster-51324.155757	Cluster-51324.94268	Cluster-51324.117457				Cluster-51324.71746
Cluster-51324.108372		Cluster-51324.135619							Cluster-51324.78776			Cluster-51324.142557	Cluster-51324.99459	Cluster-51324.105406				Cluster-51324.90782
Cluster-51324.105799		Cluster-51324.75796							Cluster-51324.88702			Cluster-51324.148989	Cluster-51324.90628	Cluster-51324.80227				Cluster-51324.78574
Cluster-51324.103726		Cluster-51324.88216							Cluster-51324.110218			Cluster-51324.104621	Cluster-51324.90902	Cluster-51324.108163				Cluster-51324.206107
Cluster-51324.143183		Cluster-51324.102982							Cluster-51324.91782			Cluster-51324.159831	Cluster-51324.96487	Cluster-51324.69376				Cluster-51324.87331
Cluster-51324.135918		Cluster-51324.46177							Cluster-51324.131786			Cluster-51324.123704	Cluster-51324.69452	Cluster-51324.103752				Cluster-51324.147017
Cluster-51324.96764		Cluster-51324.146119							Cluster-51324.119014			Cluster-51324.50682	Cluster-51324.114047	Cluster-51324.69614				Cluster-51324.101265
Cluster-51324.20463		Cluster-51324.33825							Cluster-51324.74195			Cluster-51324.142093	Cluster-51324.123338	Cluster-51324.74028				Cluster-51324.67934
Cluster-51324.108203		Cluster-51324.97625							Cluster-51324.74069			Cluster-51324.121655	Cluster-51324.116181	Cluster-51324.125512				Cluster-51324.119581
Cluster-51324.39895		Cluster-51324.83397							Cluster-51324.77562			Cluster-51324.159895	Cluster-51324.130822	Cluster-51324.79799				Cluster-51324.120856
Cluster-51324.84311		Cluster-51324.100588							Cluster-51324.70423			Cluster-51324.84685	Cluster-51324.92802	Cluster-51324.184209				Cluster-51324.64587
Cluster-51324.101795		Cluster-51324.143905							Cluster-51324.66764			Cluster-51324.130914	Cluster-51324.105403	Cluster-51324.85529				Cluster-51324.112471
Cluster-51324.94703		Cluster-51324.91153							Cluster-51324.83731			Cluster-51324.51940	Cluster-51324.136409	Cluster-51324.126190				Cluster-51324.108044
Cluster-51324.104524		Cluster-51324.117215							Cluster-51324.46667			Cluster-51324.133457	Cluster-51324.169458	Cluster-51324.65926				Cluster-51324.114263
Cluster-51324.94275		Cluster-51324.103057							Cluster-51324.85147			Cluster-51324.95192	Cluster-51324.50361	Cluster-51324.79404				Cluster-51324.138882
Cluster-51324.94734		Cluster-51324.120426							Cluster-51324.154485			Cluster-51324.28113	Cluster-51324.94683	Cluster-51324.52590				Cluster-51324.44791
Cluster-51324.85588		Cluster-51324.100687							Cluster-51324.45680			Cluster-51324.49739	Cluster-51324.76719	Cluster-51324.129276				Cluster-51324.62615
Cluster-51324.90207		Cluster-51324.160911							Cluster-51324.85507			Cluster-51324.34353	Cluster-51324.90859	Cluster-51324.117284				Cluster-51324.87391
Cluster-51324.74306		Cluster-51324.93782							Cluster-51324.105081			Cluster-51324.86764	Cluster-51324.78777	Cluster-51324.84712				Cluster-51324.66942
Cluster-51324.83302		Cluster-51324.134028							Cluster-51324.85407			Cluster-51324.54145	Cluster-51324.113833	Cluster-51324.105598				Cluster-51324.120991
Cluster-51324.50364		Cluster-51324.71752							Cluster-51324.77341			Cluster-51324.114277	Cluster-51324.98316	Cluster-51324.134233				Cluster-51324.99308
Cluster-51324.80715		Cluster-51324.86255							Cluster-51324.64922			Cluster-51324.35649	Cluster-51324.89318	Cluster-51324.118330				Cluster-51324.91706
Cluster-51324.182389		Cluster-51324.100415							Cluster-51324.129464			Cluster-51324.165751	Cluster-51324.87639	Cluster-51324.115264				Cluster-51324.88571
Cluster-51324.105778		Cluster-51324.95785							Cluster-51324.90359			Cluster-51324.93745	Cluster-51324.112187	Cluster-51324.74326				Cluster-51324.47652
Cluster-51324.107145		Cluster-51324.97127							Cluster-51324.50190			Cluster-51324.51943	Cluster-51324.81798	Cluster-51324.80284				Cluster-51324.69359
Cluster-51324.44815		Cluster-51324.68251							Cluster-51324.92391			Cluster-51324.48718	Cluster-51324.104468	Cluster-51324.72907				Cluster-51324.144695
Cluster-51324.142179		Cluster-51324.85620							Cluster-51324.97018			Cluster-51324.79720	Cluster-51324.100114	Cluster-51324.81801				Cluster-51324.104625
Cluster-51324.103746		Cluster-51324.127771							Cluster-51324.83222			Cluster-51324.118169	Cluster-51324.76440	Cluster-51324.104731				Cluster-51324.151596
Cluster-51324.128528		Cluster-51324.54810							Cluster-51324.64370			Cluster-51324.174463	Cluster-51324.110986	Cluster-51324.64897				Cluster-51324.85252
Cluster-51324.118024		Cluster-51324.93169							Cluster-51324.71920			Cluster-51324.86793	Cluster-51324.93615	Cluster-51324.165162				Cluster-51324.99239
Cluster-61111.0		Cluster-51324.136838							Cluster-51324.135364			Cluster-51324.94449	Cluster-51324.50646	Cluster-51324.65923				Cluster-51324.52088
Cluster-51324.70968		Cluster-51324.80957							Cluster-51324.92274			Cluster-51324.155390	Cluster-51324.95130	Cluster-51324.87851				Cluster-51324.105714
Cluster-51324.158821		Cluster-51324.141588							Cluster-51324.98056			Cluster-51324.54501	Cluster-51324.134303	Cluster-51324.150508				Cluster-51324.124797
Cluster-51324.89884		Cluster-51324.104902							Cluster-51324.133895			Cluster-51324.30921	Cluster-51324.93368	Cluster-51324.81614				Cluster-51324.94852
Cluster-51324.104259		Cluster-51324.146872							Cluster-51324.193570			Cluster-51324.165436	Cluster-51324.94248	Cluster-51324.130214				Cluster-51324.145455
Cluster-51324.99215		Cluster-51324.29051							Cluster-51324.98118			Cluster-51324.136848	Cluster-51324.76120	Cluster-51324.77356				Cluster-51324.144038
Cluster-51324.101264		Cluster-51324.110379							Cluster-51324.92852			Cluster-51324.149336	Cluster-51324.105903	Cluster-51324.89198				Cluster-51324.70421
Cluster-51324.131218		Cluster-51324.87527							Cluster-51324.110244			Cluster-51324.58172	Cluster-51324.88954	Cluster-51324.130054				Cluster-51324.97641
Cluster-51324.204086		Cluster-51324.84741							Cluster-51324.74225			Cluster-51324.45866	Cluster-51324.72164	Cluster-51324.94634				Cluster-51324.115749
Cluster-51324.126191		Cluster-51324.130745							Cluster-51324.64412			Cluster-51324.142695	Cluster-51324.96326	Cluster-51324.162678				Cluster-51324.76473
Cluster-51324.146630		Cluster-51324.81164							Cluster-51324.66810			Cluster-51324.163933	Cluster-51324.85044	Cluster-51324.149563				Cluster-51324.78772
Cluster-51324.146274		Cluster-51324.93560							Cluster-51324.45162			Cluster-51324.107180	Cluster-51324.94348	Cluster-51324.88866				Cluster-51324.137446
Cluster-51324.74027		Cluster-51324.116943							Cluster-51324.44532			Cluster-51324.94246	Cluster-51324.101233	Cluster-51324.47002				Cluster-51324.88908
Cluster-51324.114560		Cluster-51324.112620							Cluster-51324.90870			Cluster-51324.109097	Cluster-51324.91093	Cluster-51324.76053				Cluster-51324.85565
Cluster-51324.65505		Cluster-51324.64586							Cluster-51324.67999			Cluster-51324.83990	Cluster-51324.76439	Cluster-51324.94597				Cluster-51324.73408
Cluster-51324.4859		Cluster-51324.85977							Cluster-51324.119017			Cluster-51324.145504	Cluster-51324.129930	Cluster-51324.67678				Cluster-51324.60461
Cluster-51324.69774		Cluster-51324.141683							Cluster-51324.32517			Cluster-51324.33398	Cluster-51324.96585	Cluster-51324.72693				Cluster-51324.116172
Cluster-51324.111398		Cluster-51324.89876							Cluster-51324.85447			Cluster-51324.102590	Cluster-51324.91584	Cluster-51324.122963				Cluster-51324.85247
Cluster-51324.49642		Cluster-51324.121973							Cluster-51324.84434			Cluster-51324.45114	Cluster-51324.145343	Cluster-51324.48608				Cluster-51324.52157
Cluster-51324.53641		Cluster-51324.118889							Cluster-51324.110805			Cluster-51324.44520	Cluster-51324.94721	Cluster-51324.107994				Cluster-51324.71817
Cluster-51324.138164		Cluster-51324.194460							Cluster-51324.41786			Cluster-51324.66224	Cluster-51324.71186	Cluster-51324.105707				Cluster-51324.131434
Cluster-51324.107627		Cluster-51324.97768							Cluster-51324.74946			Cluster-51324.79983	Cluster-51324.80002	Cluster-51324.88334				Cluster-51324.82949
Cluster-51324.98777		Cluster-51324.40274							Cluster-51324.133485			Cluster-51324.52871	Cluster-51324.91756	Cluster-51324.116531				Cluster-51324.73049
Cluster-51324.84860		Cluster-51324.88586							Cluster-51324.129146			Cluster-51324.147658	Cluster-51324.100609	Cluster-51324.53680				Cluster-51324.177457
Cluster-51324.40237		Cluster-51324.117723							Cluster-51324.112676			Cluster-51324.27999	Cluster-51324.109680	Cluster-51324.40692				Cluster-51324.115741
Cluster-51324.91098		Cluster-51324.87239							Cluster-51324.59401			Cluster-51324.136938	Cluster-51324.93102	Cluster-51324.114906				Cluster-51324.85916
Cluster-51324.90647		Cluster-51324.107774							Cluster-51324.99565			Cluster-51324.104533	Cluster-51324.117846	Cluster-51324.65676				Cluster-51324.101127
Cluster-51324.74515		Cluster-51324.99248							Cluster-51324.130742			Cluster-51324.53704	Cluster-51324.77728	Cluster-51324.183653				Cluster-51324.49731
Cluster-51324.50901		Cluster-51324.114907							Cluster-51324.51284			Cluster-51324.105075	Cluster-51324.102367	Cluster-51324.78456				Cluster-51324.47705
Cluster-51324.96762		Cluster-51324.22069							Cluster-51324.82873			Cluster-51324.107181	Cluster-51324.92335	Cluster-51324.72433				Cluster-51324.109473
Cluster-51324.122745		Cluster-51324.95157							Cluster-51324.92972			Cluster-51324.109558	Cluster-51324.86977	Cluster-51324.78344				Cluster-51324.158417
Cluster-51324.133463		Cluster-51324.106968							Cluster-51324.89252			Cluster-51324.100606	Cluster-51324.163340	Cluster-51324.100070				Cluster-51324.92643
Cluster-51324.116563		Cluster-51324.98595							Cluster-51324.52319			Cluster-51324.142283	Cluster-51324.60069	Cluster-51324.127265				Cluster-51324.103237
Cluster-51324.93283		Cluster-51324.91712							Cluster-51324.64210			Cluster-51324.66626	Cluster-51324.90331	Cluster-51324.74037				Cluster-51324.189054
Cluster-51324.113654		Cluster-51324.93342							Cluster-51324.101079			Cluster-51324.126618	Cluster-51324.94996	Cluster-51324.93712				Cluster-51324.83122
Cluster-51324.89676		Cluster-51324.119953							Cluster-51324.89246			Cluster-51324.110618	Cluster-51324.94913	Cluster-51324.113414				Cluster-51324.51373
Cluster-51324.58029		Cluster-51324.38053							Cluster-51324.95515			Cluster-51324.96074	Cluster-51324.91359	Cluster-51324.104719				Cluster-51324.96382
Cluster-51324.126046		Cluster-51324.104500							Cluster-51324.129354			Cluster-51324.44587	Cluster-51324.71171	Cluster-51324.73005				Cluster-51324.92771
Cluster-51324.109896		Cluster-51324.119047							Cluster-51324.61148			Cluster-51324.149322	Cluster-51324.103426	Cluster-51324.131401				Cluster-51324.125109
Cluster-51324.75615		Cluster-51324.162826							Cluster-51324.142762			Cluster-51324.52870	Cluster-51324.89981	Cluster-51324.27786				Cluster-51324.101262
Cluster-51324.83994		Cluster-51324.106997							Cluster-51324.105363			Cluster-51324.89128	Cluster-51324.91961	Cluster-51324.141016				Cluster-51324.90798
Cluster-51324.143151		Cluster-51324.140811							Cluster-51324.108196			Cluster-51324.106152	Cluster-51324.100399	Cluster-51324.98855				Cluster-51324.81893
Cluster-51324.68101		Cluster-51324.25275							Cluster-51324.80072			Cluster-51324.70240	Cluster-51324.104325	Cluster-51324.118632				Cluster-51324.132676
Cluster-51324.97979		Cluster-51324.78978							Cluster-51324.71801			Cluster-51324.148150	Cluster-51324.96682	Cluster-51324.111926				Cluster-51324.96765
Cluster-51324.79538		Cluster-51324.134397							Cluster-51324.96203			Cluster-51324.74365	Cluster-51324.99092	Cluster-51324.108140				Cluster-51324.82561
Cluster-51324.79834		Cluster-51324.161026							Cluster-51324.54287			Cluster-51324.90781	Cluster-51324.100175	Cluster-51324.115463				Cluster-51324.87169
Cluster-51324.141075		Cluster-51324.123486							Cluster-51324.117100			Cluster-51324.152647	Cluster-51324.115182	Cluster-51324.104821				Cluster-51324.95520
Cluster-51324.60203		Cluster-51324.80584							Cluster-51324.111886			Cluster-51324.43746	Cluster-51324.87017	Cluster-51324.103567				Cluster-51324.61025
Cluster-51324.72144		Cluster-51324.103283							Cluster-51324.96405			Cluster-51324.51906	Cluster-51324.74881	Cluster-51324.116051				Cluster-51324.92189
Cluster-51324.84288		Cluster-51324.132165							Cluster-51324.113558			Cluster-51324.82975	Cluster-51324.92407	Cluster-51324.107995				Cluster-51324.118794
Cluster-51324.44468		Cluster-51324.70044							Cluster-51324.65580			Cluster-51324.52302	Cluster-51324.91177	Cluster-51324.77771				Cluster-51324.99240
Cluster-51324.88962		Cluster-51324.83473							Cluster-51324.76861			Cluster-51324.122027	Cluster-51324.90293	Cluster-51324.104696				Cluster-51324.155504
Cluster-51324.186667		Cluster-51324.43945							Cluster-51324.68513			Cluster-51324.115804	Cluster-51324.133190	Cluster-51324.100988				Cluster-51324.62271
Cluster-51324.97169		Cluster-51324.115981							Cluster-51324.84643			Cluster-51324.125651	Cluster-51324.91763	Cluster-51324.53321				Cluster-51324.123030
Cluster-51324.91172		Cluster-51324.98369							Cluster-51324.46320			Cluster-51324.141235	Cluster-51324.93633	Cluster-51324.135782				Cluster-51324.66072
Cluster-51324.105532		Cluster-51324.200013							Cluster-51324.53539			Cluster-51324.87492	Cluster-51324.95101	Cluster-51324.95291				Cluster-51324.129174
Cluster-51324.89061		Cluster-51324.128881							Cluster-51324.143684			Cluster-51324.80655	Cluster-51324.96428	Cluster-51324.98508				Cluster-51324.113777
Cluster-51324.108800		Cluster-51324.125046							Cluster-51324.87424			Cluster-51324.102416	Cluster-51324.89849	Cluster-51324.90392				Cluster-51324.107925
Cluster-51324.73333		Cluster-51324.92613							Cluster-51324.92584			Cluster-51324.95108	Cluster-51324.95938	Cluster-51324.66402				Cluster-51324.44429
Cluster-51324.86231		Cluster-51324.109475							Cluster-51324.52364			Cluster-51324.150278	Cluster-51324.131504	Cluster-51324.86685				Cluster-51324.76602
Cluster-51324.114214		Cluster-51324.111508							Cluster-51324.120274			Cluster-51324.130042	Cluster-51324.139656	Cluster-51324.125511				Cluster-51324.143770
Cluster-51324.64073		Cluster-51324.115904							Cluster-51324.142821			Cluster-51324.144502	Cluster-51324.97470	Cluster-51324.160567				Cluster-51324.107117
Cluster-51324.42434		Cluster-51324.94423							Cluster-51324.106809			Cluster-51324.105917	Cluster-51324.90582	Cluster-51324.76982				Cluster-51324.57160
Cluster-51324.100250		Cluster-51324.110166							Cluster-51324.90204			Cluster-51324.72044	Cluster-51324.111445	Cluster-51324.180016				Cluster-51324.95339
Cluster-51324.135336		Cluster-51324.138737							Cluster-51324.85227			Cluster-51324.55099	Cluster-51324.94288	Cluster-51324.52851				Cluster-51324.85618
Cluster-51324.86570		Cluster-51324.86465							Cluster-51324.92783			Cluster-51324.150998	Cluster-51324.80724	Cluster-51324.69584				Cluster-51324.91384
Cluster-51324.84592		Cluster-51324.141453							Cluster-51324.108047			Cluster-51324.101922	Cluster-51324.80464	Cluster-51324.115554				Cluster-51324.57852
Cluster-51324.120777		Cluster-51324.101090							Cluster-51324.54284			Cluster-51324.151578	Cluster-51324.111661	Cluster-51324.120523				Cluster-51324.117508
Cluster-51324.96785		Cluster-51324.35968							Cluster-51324.151285			Cluster-51324.77661	Cluster-51324.80643	Cluster-51324.61914				Cluster-51324.93093
Cluster-51324.96048		Cluster-51324.141371							Cluster-51324.57359			Cluster-51324.133193	Cluster-51324.168935	Cluster-51324.124273				Cluster-51324.145569
Cluster-51324.103312		Cluster-51324.48623							Cluster-51324.68102			Cluster-51324.205324	Cluster-51324.95145	Cluster-51324.119365				Cluster-51324.143778
Cluster-51324.63483		Cluster-51324.173753							Cluster-51324.71758			Cluster-51324.95242	Cluster-51324.88913	Cluster-51324.99548				Cluster-51324.49514
Cluster-51324.44705		Cluster-51324.90258							Cluster-51324.151649			Cluster-51324.90221	Cluster-51324.105182	Cluster-51324.82293				Cluster-51324.103435
Cluster-51324.96230		Cluster-51324.119533							Cluster-51324.90552			Cluster-51324.61542	Cluster-51324.98732	Cluster-51324.125902				Cluster-51324.78797
Cluster-51324.112255		Cluster-51324.114071							Cluster-51324.107536			Cluster-51324.166391	Cluster-51324.110124	Cluster-51324.96882				Cluster-51324.92676
Cluster-51324.94761		Cluster-51324.112921							Cluster-51324.67085			Cluster-51324.68568	Cluster-51324.84875	Cluster-51324.104685				Cluster-51324.105136
Cluster-51324.97021		Cluster-51324.101948							Cluster-51324.147737			Cluster-51324.50427	Cluster-51324.95603	Cluster-51324.94794				Cluster-51324.87995
Cluster-51324.135180		Cluster-51324.107643							Cluster-51324.95260			Cluster-51324.77584	Cluster-51324.94956	Cluster-51324.143820				Cluster-51324.86721
Cluster-51324.148468		Cluster-51324.123094							Cluster-51324.126610			Cluster-51324.84083	Cluster-51324.94297	Cluster-51324.62048				Cluster-51324.89679
Cluster-51324.87005		Cluster-51324.57203							Cluster-51324.135941			Cluster-51324.93289	Cluster-51324.119665	Cluster-51324.71716				Cluster-51324.138260
Cluster-51324.72854		Cluster-51324.117136							Cluster-51324.113210			Cluster-51324.118947	Cluster-51324.154444	Cluster-51324.140861				Cluster-51324.52144
Cluster-51324.123713		Cluster-51324.125332							Cluster-51324.92763			Cluster-51324.156854	Cluster-51324.77982	Cluster-51324.91333				Cluster-51324.96875
Cluster-51324.106344		Cluster-51324.143442							Cluster-51324.58774			Cluster-51324.87525	Cluster-51324.85662	Cluster-51324.75244				Cluster-51324.167408
Cluster-51324.97849		Cluster-51324.135712							Cluster-51324.112359			Cluster-51324.100583	Cluster-51324.134503	Cluster-51324.109016				Cluster-51324.53027
Cluster-51324.116021		Cluster-51324.83267							Cluster-51324.48710			Cluster-51324.154740	Cluster-51324.95861	Cluster-51324.101656				Cluster-51324.91734
Cluster-51324.95369		Cluster-51324.112939							Cluster-51324.53646			Cluster-51324.43962	Cluster-51324.88985	Cluster-51324.93853				Cluster-51324.109920
Cluster-51324.96522		Cluster-51324.41421							Cluster-51324.92764			Cluster-51324.26762	Cluster-51324.91771	Cluster-51324.113750				Cluster-51324.100304
Cluster-51324.151247		Cluster-51324.104106							Cluster-51324.54479			Cluster-51324.51884	Cluster-51324.105203	Cluster-51324.154659				Cluster-51324.113775
Cluster-51324.81453		Cluster-51324.65981							Cluster-51324.83276			Cluster-51324.120514	Cluster-51324.99569	Cluster-51324.84973				Cluster-51324.93928
Cluster-51324.121983		Cluster-51324.39483							Cluster-51324.48733			Cluster-51324.119659	Cluster-51324.100113	Cluster-51324.74669				Cluster-51324.85702
Cluster-51324.121004		Cluster-51324.88319							Cluster-51324.68949			Cluster-51324.150738	Cluster-51324.123591	Cluster-51324.89354				Cluster-51324.91531
Cluster-51324.147601		Cluster-51324.118687							Cluster-51324.57086			Cluster-51324.83972	Cluster-51324.114458	Cluster-51324.112007				Cluster-51324.96364
Cluster-51324.50760		Cluster-51324.98727							Cluster-51324.41719			Cluster-51324.84872	Cluster-51324.87612	Cluster-51324.59144				Cluster-51324.88338
Cluster-51324.94013		Cluster-51324.74320							Cluster-51324.84111			Cluster-51324.135083	Cluster-51324.104494	Cluster-51324.94791				Cluster-51324.117645
Cluster-51324.82148		Cluster-51324.71049							Cluster-51324.117933			Cluster-51324.154011	Cluster-51324.104593	Cluster-51324.103118				Cluster-51324.67826
Cluster-51324.51283		Cluster-51324.107173							Cluster-51324.52263			Cluster-51324.85892	Cluster-51324.93975	Cluster-51324.53229				Cluster-51324.43328
Cluster-51324.83881		Cluster-51324.88506							Cluster-51324.152426			Cluster-51324.97242	Cluster-51324.101935	Cluster-51324.127309				Cluster-51324.93330
Cluster-51324.78697		Cluster-51324.88392							Cluster-51324.54802			Cluster-51324.143672	Cluster-51324.108768	Cluster-51324.92887				Cluster-51324.84455
Cluster-51324.31953		Cluster-51324.93681							Cluster-51324.159122			Cluster-51324.94437	Cluster-51324.67639	Cluster-51324.74771				Cluster-51324.106653
Cluster-51324.96517		Cluster-51324.42241							Cluster-51324.114374			Cluster-51324.138282	Cluster-51324.110193	Cluster-51324.132244				Cluster-51324.143942
Cluster-51324.117239		Cluster-51324.84401							Cluster-51324.87068			Cluster-51324.157287	Cluster-51324.100359	Cluster-51324.135334				Cluster-51324.75648
Cluster-51324.154889		Cluster-51324.17235							Cluster-51324.74467			Cluster-51324.29261	Cluster-51324.109523	Cluster-51324.39816				Cluster-51324.140667
Cluster-51324.87062		Cluster-51324.103217							Cluster-51324.120795			Cluster-51324.119830	Cluster-51324.80274	Cluster-51324.95147				Cluster-51324.146380
Cluster-51324.179730		Cluster-51324.122533							Cluster-51324.50164			Cluster-51324.87341	Cluster-51324.120817	Cluster-51324.117739				Cluster-51324.82282
Cluster-51324.93627		Cluster-51324.83257							Cluster-51324.65503			Cluster-51324.36076	Cluster-51324.112625	Cluster-51324.76941				Cluster-51324.59962
Cluster-51324.97222		Cluster-51324.75973							Cluster-51324.155913			Cluster-51324.92801	Cluster-51324.73434	Cluster-51324.87114				Cluster-51324.65496
Cluster-51324.144335		Cluster-51324.100255							Cluster-51324.75035			Cluster-51324.102549	Cluster-51324.87971	Cluster-51324.92860				Cluster-51324.95178
Cluster-51324.74071		Cluster-51324.60956							Cluster-51324.34221			Cluster-51324.51905	Cluster-51324.94149	Cluster-51324.118625				Cluster-51324.101388
Cluster-51324.96940		Cluster-51324.56103							Cluster-51324.120892			Cluster-51324.71648	Cluster-51324.130621	Cluster-51324.126767				Cluster-51324.68056
Cluster-51324.81947		Cluster-51324.201239							Cluster-51324.84603			Cluster-51324.150411	Cluster-51324.96949	Cluster-51324.111164				Cluster-51324.115061
Cluster-51324.109765		Cluster-51324.173364							Cluster-51324.159986			Cluster-51324.153173	Cluster-51324.70323	Cluster-51324.73345				Cluster-51324.96415
Cluster-51324.101929		Cluster-51324.69984							Cluster-51324.118467			Cluster-51324.54554	Cluster-51324.79309	Cluster-51324.90095				Cluster-51324.85839
Cluster-51324.88065		Cluster-51324.162442							Cluster-51324.95819			Cluster-51324.140933	Cluster-51324.99103	Cluster-51324.136527				Cluster-51324.47886
Cluster-51324.105684		Cluster-51324.115542							Cluster-51324.90188			Cluster-51324.149316	Cluster-51324.94445	Cluster-51324.86632				Cluster-51324.94844
Cluster-51324.87421		Cluster-51324.108753							Cluster-51324.86554			Cluster-51324.53762	Cluster-51324.93435	Cluster-51324.87910				Cluster-51324.67362
Cluster-51324.77570		Cluster-51324.130850							Cluster-51324.80028			Cluster-51324.167538	Cluster-51324.122736	Cluster-51324.125444				Cluster-51324.90969
Cluster-51324.90099		Cluster-51324.84885							Cluster-51324.49028			Cluster-51324.12517	Cluster-51324.94409	Cluster-51324.102446				Cluster-51324.81494
Cluster-51324.116971		Cluster-51324.151832							Cluster-51324.52417			Cluster-51324.76077	Cluster-51324.125810	Cluster-51324.135195				Cluster-51324.65734
Cluster-51324.138078		Cluster-51324.64218							Cluster-51324.81914			Cluster-51324.208961	Cluster-51324.100597	Cluster-51324.105694				Cluster-51324.92401
Cluster-51324.113591		Cluster-51324.87348							Cluster-51324.180316			Cluster-51324.87184	Cluster-51324.72695	Cluster-51324.107215				Cluster-51324.72967
Cluster-51324.94751		Cluster-51324.154271							Cluster-51324.46535			Cluster-51324.54354	Cluster-51324.82611	Cluster-51324.112342				Cluster-51324.105065
Cluster-51324.132600		Cluster-51324.122678							Cluster-51324.91417			Cluster-51324.109773	Cluster-51324.85484	Cluster-51324.103796				Cluster-51324.60754
Cluster-51324.51585		Cluster-51324.93447							Cluster-51324.84188			Cluster-51324.187171	Cluster-51324.96000	Cluster-51324.102337				Cluster-51324.88388
Cluster-51324.80953		Cluster-51324.84969							Cluster-51324.85512			Cluster-51324.91572	Cluster-51324.37340	Cluster-51324.112975				Cluster-51324.153380
Cluster-51324.111155		Cluster-51324.52258							Cluster-51324.73504			Cluster-51324.47393	Cluster-51324.97479	Cluster-51324.115102				Cluster-51324.140830
Cluster-51324.91309		Cluster-51324.87754							Cluster-51324.41877			Cluster-51324.44888	Cluster-51324.94132	Cluster-51324.89633				Cluster-51324.37008
Cluster-51324.88176		Cluster-51324.92534							Cluster-51324.54286			Cluster-51324.158092	Cluster-51324.98437	Cluster-51324.47314				Cluster-51324.108607
Cluster-51324.140428		Cluster-51324.165201							Cluster-51324.106618			Cluster-51324.158750	Cluster-51324.59654	Cluster-51324.72843				Cluster-51324.95538
Cluster-51324.115938		Cluster-51324.117379							Cluster-51324.102933			Cluster-51324.157289	Cluster-51324.82772	Cluster-51324.160394				Cluster-51324.109163
Cluster-51324.70438		Cluster-51324.101601							Cluster-51324.96358			Cluster-51324.85350	Cluster-51324.96525	Cluster-51324.138198				Cluster-51324.106905
Cluster-51324.95716		Cluster-51324.82100							Cluster-51324.53556			Cluster-51324.119937	Cluster-51324.78603	Cluster-51324.91156				Cluster-51324.166146
Cluster-51324.91170		Cluster-51324.84521							Cluster-51324.96907			Cluster-51324.50625	Cluster-51324.101658	Cluster-51324.47171				Cluster-51324.104086
Cluster-51324.79510		Cluster-51324.56180							Cluster-51324.57200			Cluster-51324.145450	Cluster-51324.94309	Cluster-51324.116692				Cluster-51324.76452
Cluster-51324.108728		Cluster-51324.106104							Cluster-51324.94562			Cluster-51324.86024	Cluster-51324.94948	Cluster-51324.136115				Cluster-51324.113205
Cluster-51324.135335		Cluster-51324.93792							Cluster-51324.170155			Cluster-51324.71567	Cluster-51324.71341	Cluster-51324.98802				Cluster-51324.90182
Cluster-51324.109090		Cluster-51324.145872							Cluster-51324.31811			Cluster-51324.51514	Cluster-51324.129444	Cluster-51324.103596				Cluster-51324.92484
Cluster-51324.76865		Cluster-51324.49972							Cluster-51324.88219			Cluster-51324.52649	Cluster-51324.145018	Cluster-51324.113990				Cluster-51324.78153
Cluster-51324.96380		Cluster-51324.79551							Cluster-51324.89231			Cluster-51324.157418	Cluster-51324.89848	Cluster-51324.100613				Cluster-51324.90470
Cluster-51324.84405		Cluster-51324.166759							Cluster-51324.142768			Cluster-51324.44132	Cluster-51324.89451	Cluster-51324.97056				Cluster-51324.97452
Cluster-51324.34656		Cluster-51324.93530							Cluster-51324.72879			Cluster-51324.141968	Cluster-51324.73361	Cluster-51324.76422				Cluster-51324.93717
Cluster-51324.125203		Cluster-51324.93851							Cluster-51324.139161			Cluster-51324.70442	Cluster-51324.85708	Cluster-51324.103112				Cluster-51324.96023
Cluster-51324.100117		Cluster-51324.107058							Cluster-51324.142763			Cluster-51324.142615	Cluster-51324.95461	Cluster-51324.76612				Cluster-51324.87640
Cluster-51324.146272		Cluster-51324.67561							Cluster-51324.69878			Cluster-51324.116421	Cluster-51324.90823	Cluster-51324.75657				Cluster-51324.81944
Cluster-51324.101753		Cluster-51324.117066							Cluster-51324.42349			Cluster-51324.157933	Cluster-51324.114475	Cluster-51324.109156				Cluster-51324.98814
Cluster-51324.45210		Cluster-51324.145441							Cluster-51324.120808			Cluster-51324.16649	Cluster-51324.97669	Cluster-51324.89010				Cluster-51324.90790
Cluster-51324.75595		Cluster-51324.105352							Cluster-51324.81201			Cluster-51324.88998	Cluster-51324.27887	Cluster-51324.72580				Cluster-51324.122045
Cluster-51324.72840		Cluster-51324.54614							Cluster-51324.48572			Cluster-51324.128916	Cluster-51324.98746	Cluster-51324.84554				Cluster-51324.20003
Cluster-51324.98493		Cluster-51324.79455							Cluster-51324.43757			Cluster-51324.146067	Cluster-51324.98943	Cluster-51324.80033				Cluster-51324.97238
Cluster-51324.99069		Cluster-51324.114003							Cluster-51324.111177			Cluster-51324.53311	Cluster-51324.101639	Cluster-51324.73597				Cluster-51324.84911
Cluster-51324.50152		Cluster-51324.81747							Cluster-51324.117932			Cluster-51324.141031	Cluster-51324.138891	Cluster-51324.73006				Cluster-51324.58177
Cluster-51324.121795		Cluster-51324.65553							Cluster-51324.125869			Cluster-51324.53767	Cluster-51324.81826	Cluster-51324.38001				Cluster-51324.89719
Cluster-51324.105597		Cluster-51324.103213							Cluster-51324.138561			Cluster-51324.50865	Cluster-51324.124514	Cluster-51324.101282				Cluster-51324.52900
Cluster-51324.85012		Cluster-51324.94151							Cluster-51324.52206			Cluster-51324.45105	Cluster-51324.101243	Cluster-51324.95254				Cluster-51324.49948
Cluster-51324.185557		Cluster-51324.110859							Cluster-51324.188965			Cluster-51324.43036	Cluster-51324.97992	Cluster-51324.98894				Cluster-51324.138087
Cluster-51324.106216		Cluster-51324.67611							Cluster-51324.81691			Cluster-51324.110145	Cluster-51324.197229	Cluster-51324.115647				Cluster-51324.41234
Cluster-51324.143970		Cluster-51324.59461							Cluster-51324.128159			Cluster-51324.107229	Cluster-51324.87258	Cluster-51324.101996				Cluster-51324.201661
Cluster-51324.97798		Cluster-51324.160134							Cluster-51324.138030			Cluster-51324.62128	Cluster-51324.95261	Cluster-51324.47170				Cluster-51324.97346
Cluster-51324.111738		Cluster-51324.109530							Cluster-51324.92108			Cluster-51324.143687	Cluster-51324.102199	Cluster-51324.55990				Cluster-51324.104689
Cluster-51324.92690		Cluster-51324.92637							Cluster-51324.99645			Cluster-51324.139698	Cluster-51324.72752	Cluster-51324.110460				Cluster-51324.115757
Cluster-51324.94668		Cluster-51324.89964							Cluster-51324.146493			Cluster-51324.153760	Cluster-51324.114697	Cluster-51324.125661				Cluster-51324.53285
Cluster-51324.123820		Cluster-51324.59192							Cluster-51324.149754			Cluster-51324.101429	Cluster-51324.83099	Cluster-51324.100192				Cluster-51324.79084
Cluster-51324.29250		Cluster-51324.68491							Cluster-51324.151288			Cluster-51324.124438	Cluster-51324.98842	Cluster-51324.98267				Cluster-51324.33122
Cluster-51324.133018		Cluster-51324.86694							Cluster-51324.46942			Cluster-51324.206765	Cluster-51324.84419	Cluster-51324.107871				Cluster-51324.112114
Cluster-51324.12084		Cluster-51324.139372							Cluster-51324.112092			Cluster-51324.53703	Cluster-51324.102876	Cluster-51324.103978				Cluster-51324.92818
Cluster-51324.80141		Cluster-51324.63321							Cluster-51324.168373			Cluster-51324.113320	Cluster-51324.156291	Cluster-51324.45793				Cluster-51324.92253
Cluster-51324.105745		Cluster-51324.89293							Cluster-51324.88051			Cluster-51324.87065	Cluster-51324.96228	Cluster-51324.75446				Cluster-51324.72167
Cluster-51324.95917		Cluster-51324.101513							Cluster-51324.139633			Cluster-51324.100634	Cluster-51324.100534	Cluster-47193.0				Cluster-51324.61332
Cluster-51324.105217		Cluster-51324.139734							Cluster-51324.105080			Cluster-51324.51822	Cluster-51324.78835	Cluster-51324.149557				Cluster-51324.73824
Cluster-51324.98196		Cluster-51324.109656							Cluster-51324.145558			Cluster-51324.115052	Cluster-51324.99053	Cluster-51324.127511				Cluster-51324.73306
Cluster-51324.109996		Cluster-51324.99923							Cluster-51324.86240			Cluster-51324.49273	Cluster-51324.93206	Cluster-51324.80239				Cluster-51324.47852
Cluster-51324.71869		Cluster-51324.160731							Cluster-51324.53284			Cluster-51324.51713	Cluster-51324.102291	Cluster-51324.97591				Cluster-51324.90163
Cluster-51324.53880		Cluster-51324.144060							Cluster-51324.62066			Cluster-51324.53720	Cluster-51324.93076	Cluster-51324.56279				Cluster-51324.140832
Cluster-51324.176756		Cluster-51324.72908							Cluster-51324.120794			Cluster-51324.152863	Cluster-51324.99866	Cluster-51324.141060				Cluster-51324.95083
Cluster-51324.36833		Cluster-51324.138432							Cluster-51324.83935			Cluster-51324.48975	Cluster-51324.103673	Cluster-51324.77338				Cluster-51324.137818
Cluster-51324.72239		Cluster-51324.88046							Cluster-51324.36471			Cluster-51324.122868	Cluster-51324.96259	Cluster-51324.73464				Cluster-51324.123503
Cluster-51324.48688		Cluster-51324.92488							Cluster-51324.158922			Cluster-51324.36426	Cluster-51324.89369	Cluster-51324.111435				Cluster-51324.126608
Cluster-51324.95724		Cluster-51324.83880							Cluster-51324.62773			Cluster-51324.112112	Cluster-51324.95566	Cluster-51324.102779				Cluster-51324.37315
Cluster-51324.138947		Cluster-51324.69200							Cluster-51324.68165			Cluster-51324.37638	Cluster-51324.102845	Cluster-51324.122170				Cluster-51324.86056
Cluster-51324.111030		Cluster-51324.106913							Cluster-51324.63000			Cluster-51324.128981	Cluster-51324.91456	Cluster-51324.87475				Cluster-51324.101908
Cluster-51324.109974		Cluster-51324.47053							Cluster-51324.113862			Cluster-51324.49529	Cluster-51324.93443	Cluster-51324.84742				Cluster-51324.113062
Cluster-51324.72763		Cluster-51324.47741							Cluster-51324.127513			Cluster-51324.105197	Cluster-51324.84836	Cluster-51324.100825				Cluster-51324.92714
Cluster-51324.96189		Cluster-51324.96033							Cluster-51324.46321			Cluster-51324.51243	Cluster-51324.112178	Cluster-51324.76106				Cluster-51324.95693
Cluster-51324.93056		Cluster-51324.120624							Cluster-51324.91396			Cluster-51324.105224	Cluster-51324.100083	Cluster-51324.160652				Cluster-51324.92828
Cluster-51324.96990		Cluster-51324.92540							Cluster-51324.89397			Cluster-51324.69036	Cluster-51324.132188	Cluster-51324.117801				Cluster-51324.86476
Cluster-51324.51522		Cluster-51324.105966							Cluster-51324.71542			Cluster-51324.88352	Cluster-51324.95352	Cluster-51324.41401				Cluster-51324.52462
Cluster-51324.95300		Cluster-51324.2339							Cluster-51324.90561			Cluster-51324.51883	Cluster-51324.88351	Cluster-51324.107809				Cluster-51324.148245
Cluster-51324.95072		Cluster-51324.72834							Cluster-51324.73086			Cluster-51324.142191	Cluster-51324.122722	Cluster-51324.121514				Cluster-51324.132441
Cluster-51324.132789		Cluster-51324.74105							Cluster-51324.34511			Cluster-51324.52332	Cluster-51324.106920	Cluster-51324.135759				Cluster-51324.120757
Cluster-51324.128230		Cluster-51324.114393							Cluster-51324.77975			Cluster-51324.52365	Cluster-51324.90322	Cluster-51324.55539				Cluster-51324.60077
Cluster-51324.106844		Cluster-51324.196161							Cluster-51324.89730			Cluster-51324.90840	Cluster-51324.138374	Cluster-51324.71284				Cluster-51324.192315
Cluster-51324.67804		Cluster-51324.145260							Cluster-51324.147523			Cluster-51324.99118	Cluster-51324.91253	Cluster-51324.79974				Cluster-51324.84943
Cluster-51324.69371		Cluster-51324.90827							Cluster-51324.89732			Cluster-51324.41565	Cluster-51324.55632	Cluster-51324.123805				Cluster-51324.129311
Cluster-51324.66241		Cluster-51324.102364							Cluster-51324.117800			Cluster-51324.103220	Cluster-51324.79191	Cluster-51324.46755				Cluster-51324.125861
Cluster-51324.71285		Cluster-51324.116255							Cluster-51324.70308			Cluster-51324.103222	Cluster-51324.96615	Cluster-51324.67676				Cluster-51324.92823
Cluster-51324.141360		Cluster-51324.75936							Cluster-51324.99426			Cluster-51324.87962	Cluster-51324.94302	Cluster-51324.116369				Cluster-51324.134219
Cluster-51324.94990		Cluster-51324.110529							Cluster-51324.88360			Cluster-51324.148589	Cluster-51324.51672	Cluster-51324.108562				Cluster-51324.96122
Cluster-51324.75198		Cluster-51324.76734							Cluster-51324.121247			Cluster-51324.102941	Cluster-51324.98896	Cluster-51324.179769				Cluster-51324.110932
Cluster-51324.115637		Cluster-51324.48362							Cluster-51324.139637			Cluster-51324.142866	Cluster-51324.91481	Cluster-51324.39446				Cluster-51324.81833
Cluster-51324.119199		Cluster-51324.82375							Cluster-51324.92130			Cluster-51324.142325	Cluster-51324.114095	Cluster-51324.89576				Cluster-51324.120830
Cluster-51324.174046		Cluster-51324.87212							Cluster-51324.142588			Cluster-51324.146728	Cluster-51324.135746	Cluster-51324.129847				Cluster-51324.70244
Cluster-51324.76917		Cluster-51324.130721							Cluster-51324.54794			Cluster-51324.69044	Cluster-51324.148367	Cluster-51324.95988				Cluster-51324.142327
Cluster-51324.140558		Cluster-51324.113636							Cluster-51324.71029			Cluster-33796.1	Cluster-51324.92872	Cluster-51324.92642				Cluster-51324.195256
Cluster-51324.94899		Cluster-51324.103179							Cluster-51324.86747			Cluster-51324.46948	Cluster-51324.43646	Cluster-51324.111646				Cluster-51324.103907
Cluster-51324.145615		Cluster-51324.120581							Cluster-51324.67996			Cluster-51324.84723	Cluster-51324.66178	Cluster-51324.94129				Cluster-51324.93528
Cluster-51324.67452		Cluster-51324.88996							Cluster-51324.83229			Cluster-51324.61434	Cluster-51324.78040	Cluster-51324.36002				Cluster-51324.148640
Cluster-51324.115576		Cluster-51324.84840							Cluster-51324.15990			Cluster-51324.134405	Cluster-51324.97377	Cluster-51324.68090				Cluster-51324.87022
Cluster-51324.93333		Cluster-51324.83347							Cluster-51324.75434			Cluster-51324.99287	Cluster-51324.120047	Cluster-51324.118817				Cluster-51324.95466
Cluster-51324.30251		Cluster-51324.109327							Cluster-51324.141465			Cluster-51324.136225	Cluster-51324.140251	Cluster-51324.140619				Cluster-51324.120183
Cluster-51324.68323		Cluster-51324.126356							Cluster-51324.127002			Cluster-51324.102743	Cluster-51324.130583	Cluster-51324.107297				Cluster-51324.72475
Cluster-51324.103338		Cluster-51324.46519							Cluster-51324.141837			Cluster-51324.103466	Cluster-51324.85784	Cluster-51324.111464				Cluster-51324.46547
Cluster-51324.115354		Cluster-51324.100859							Cluster-51324.113011			Cluster-51324.86390	Cluster-51324.103231	Cluster-51324.80188				Cluster-51324.114221
Cluster-51324.103354		Cluster-51324.94398							Cluster-51324.40339			Cluster-51324.143839	Cluster-51324.121559	Cluster-51324.74867				Cluster-51324.38471
Cluster-51324.100330		Cluster-51324.151107							Cluster-51324.144884			Cluster-51324.45193	Cluster-51324.124668	Cluster-51324.97694				Cluster-51324.52765
Cluster-51324.133016		Cluster-51324.107122							Cluster-51324.65898			Cluster-51324.34676	Cluster-51324.87611	Cluster-51324.86214				Cluster-51324.48176
Cluster-51324.83553		Cluster-51324.68564							Cluster-51324.100784			Cluster-51324.147809	Cluster-51324.96341	Cluster-51324.119658				Cluster-51324.88223
Cluster-51324.75140		Cluster-51324.121726							Cluster-51324.52265			Cluster-51324.106594	Cluster-51324.54133	Cluster-51324.100446				Cluster-51324.63471
Cluster-51324.95451		Cluster-1285.1							Cluster-51324.130999			Cluster-51324.51774	Cluster-51324.87349	Cluster-51324.41645				Cluster-51324.74820
Cluster-51324.144051		Cluster-51324.122577							Cluster-51324.192388			Cluster-51324.45107	Cluster-51324.95823	Cluster-51324.123923				Cluster-51324.119637
Cluster-51324.81390		Cluster-51324.120509							Cluster-51324.51040			Cluster-51324.72508	Cluster-51324.144599	Cluster-51324.118477				Cluster-51324.138013
Cluster-51324.115975		Cluster-51324.86535							Cluster-51324.89686			Cluster-51324.106800	Cluster-51324.101828	Cluster-51324.54008				Cluster-51324.100126
Cluster-51324.53338		Cluster-51324.174426							Cluster-51324.114677			Cluster-51324.152441	Cluster-51324.96668	Cluster-51324.133941				Cluster-51324.166617
Cluster-51324.114309		Cluster-51324.93698							Cluster-51324.126288			Cluster-51324.36930	Cluster-51324.65362	Cluster-51324.119678				Cluster-51324.89416
Cluster-51324.87675		Cluster-51324.113309							Cluster-51324.54697			Cluster-51324.130487	Cluster-51324.80550	Cluster-51324.35131				Cluster-51324.54594
Cluster-51324.70835		Cluster-51324.196301							Cluster-51324.32334			Cluster-51324.84264	Cluster-51324.101836	Cluster-51324.132932				Cluster-51324.99375
Cluster-51324.109268		Cluster-51324.56758							Cluster-51324.121635			Cluster-51324.154604	Cluster-51324.94265	Cluster-51324.96956				Cluster-51324.120480
Cluster-51324.74931		Cluster-51324.102438							Cluster-51324.72686			Cluster-51324.163538	Cluster-51324.96712	Cluster-51324.126330				Cluster-51324.84348
Cluster-51324.123435		Cluster-51324.104986							Cluster-51324.54696			Cluster-51324.50622	Cluster-51324.92069	Cluster-51324.85928				Cluster-51324.122339
Cluster-51324.70882		Cluster-51324.113628							Cluster-51324.96347			Cluster-51324.86998	Cluster-51324.98409	Cluster-51324.124627				Cluster-51324.41322
Cluster-51324.50415		Cluster-51324.107322							Cluster-51324.66958			Cluster-51324.46799	Cluster-51324.94960	Cluster-51324.83996				Cluster-51324.134241
Cluster-51324.51121		Cluster-51324.106907							Cluster-51324.61429			Cluster-51324.125482	Cluster-51324.158728	Cluster-51324.108767				Cluster-51324.79035
Cluster-51324.105177		Cluster-51324.111979							Cluster-51324.93884			Cluster-51324.53628	Cluster-51324.94826	Cluster-51324.130141				Cluster-51324.137883
Cluster-51324.70199		Cluster-51324.53453							Cluster-51324.163055			Cluster-51324.53291	Cluster-51324.80830	Cluster-51324.58125				Cluster-51324.151315
Cluster-51324.97899		Cluster-51324.25987							Cluster-51324.49462			Cluster-51324.43745	Cluster-51324.92432	Cluster-51324.161860				Cluster-51324.119487
Cluster-51324.60516		Cluster-51324.137091							Cluster-51324.96366			Cluster-51324.95633	Cluster-51324.106199	Cluster-51324.101712				Cluster-51324.100212
Cluster-51324.91829		Cluster-51324.126205							Cluster-51324.90730			Cluster-51324.149320	Cluster-51324.95186	Cluster-51324.91017				Cluster-51324.164296
Cluster-51324.53225		Cluster-51324.97373							Cluster-51324.86016			Cluster-51324.112689	Cluster-51324.110355	Cluster-51324.32530				Cluster-51324.88991
Cluster-51324.144697		Cluster-51324.81154							Cluster-51324.84796			Cluster-51324.50183	Cluster-51324.74222	Cluster-51324.121513				Cluster-51324.113278
Cluster-51324.93514		Cluster-51324.112755							Cluster-51324.90329			Cluster-51324.75770	Cluster-51324.97724	Cluster-51324.79970				Cluster-51324.79400
Cluster-51324.99953		Cluster-51324.79388							Cluster-51324.34227			Cluster-51324.77574	Cluster-51324.107989	Cluster-51324.111787				Cluster-51324.101040
Cluster-51324.93004		Cluster-51324.93405							Cluster-51324.94062			Cluster-51324.147993	Cluster-51324.144450	Cluster-51324.105780				Cluster-51324.81831
Cluster-51324.93037		Cluster-51324.86178							Cluster-51324.27189			Cluster-51324.144534	Cluster-51324.95484	Cluster-51324.175948				Cluster-51324.100502
Cluster-51324.135865		Cluster-51324.56649							Cluster-51324.66056			Cluster-51324.70993	Cluster-51324.100998	Cluster-51324.30551				Cluster-51324.80513
Cluster-51324.84066		Cluster-51324.87750							Cluster-51324.146104			Cluster-51324.141390	Cluster-51324.107729	Cluster-51324.64574				Cluster-51324.105419
Cluster-51324.89695		Cluster-51324.178418							Cluster-51324.101182			Cluster-51324.80295	Cluster-51324.92010	Cluster-51324.135452				Cluster-51324.111843
Cluster-51324.110148		Cluster-51324.99800							Cluster-51324.90971			Cluster-51324.52422	Cluster-51324.81630	Cluster-51324.80936				Cluster-51324.96098
Cluster-51324.96784		Cluster-51324.93121							Cluster-51324.70777			Cluster-51324.87069	Cluster-51324.136786	Cluster-51324.79153				Cluster-51324.72412
Cluster-51324.143565		Cluster-51324.77773							Cluster-51324.53731			Cluster-51324.155117	Cluster-51324.93740	Cluster-51324.60447				Cluster-51324.93503
Cluster-51324.123379		Cluster-51324.57856							Cluster-51324.107082			Cluster-51324.174576	Cluster-51324.91410	Cluster-51324.121906				Cluster-51324.86128
Cluster-51324.149334		Cluster-51324.98531							Cluster-51324.60266			Cluster-51324.93046	Cluster-51324.97024	Cluster-51324.128272				Cluster-51324.141546
Cluster-51324.54124		Cluster-51324.181311							Cluster-51324.93233			Cluster-51324.126166	Cluster-51324.159075	Cluster-51324.151036				Cluster-51324.73898
Cluster-51324.71833		Cluster-51324.125282							Cluster-51324.52971			Cluster-51324.7628	Cluster-51324.94049	Cluster-51324.123931				Cluster-51324.114103
Cluster-51324.94675		Cluster-51324.89932							Cluster-51324.47443			Cluster-51324.170551	Cluster-51324.85080	Cluster-51324.94025				Cluster-51324.74330
Cluster-51324.80954		Cluster-51324.75836							Cluster-51324.58299			Cluster-27705.3	Cluster-51324.85815	Cluster-51324.80738				Cluster-51324.77702
Cluster-51324.145372		Cluster-51324.106367							Cluster-51324.111818			Cluster-51324.94282	Cluster-51324.121825	Cluster-51324.118970				Cluster-51324.128071
Cluster-51324.29979		Cluster-51324.99762							Cluster-51324.93655			Cluster-51324.142706	Cluster-51324.93182	Cluster-51324.95021				Cluster-51324.126580
Cluster-51324.100533		Cluster-51324.74844							Cluster-51324.168858			Cluster-51324.157275	Cluster-51324.50771	Cluster-51324.141151				Cluster-51324.172699
Cluster-51324.119664		Cluster-51324.88122							Cluster-51324.97131			Cluster-51324.154219	Cluster-51324.95459	Cluster-51324.131512				Cluster-51324.184283
Cluster-51324.106162		Cluster-51324.95795							Cluster-51324.62963			Cluster-51324.49661	Cluster-51324.94098	Cluster-51324.79416				Cluster-51324.60149
Cluster-51324.98504		Cluster-51324.92485							Cluster-51324.95867			Cluster-51324.70440	Cluster-51324.123885	Cluster-51324.48901				Cluster-51324.100321
Cluster-51324.164893		Cluster-51324.86549							Cluster-51324.104209			Cluster-51324.95191	Cluster-51324.48626	Cluster-51324.148252				Cluster-51324.98379
Cluster-51324.98147		Cluster-51324.67830							Cluster-51324.46319			Cluster-51324.143174	Cluster-51324.110559	Cluster-51324.75413				Cluster-51324.107773
Cluster-51324.105956		Cluster-51324.127952							Cluster-51324.82648			Cluster-51324.70348	Cluster-51324.98471	Cluster-51324.91991				Cluster-51324.60898
Cluster-51324.96351		Cluster-51324.96113							Cluster-51324.73699			Cluster-51324.54190	Cluster-51324.96856	Cluster-51324.100590				Cluster-51324.110303
Cluster-51324.144719		Cluster-51324.77573							Cluster-51324.103817			Cluster-51324.99117	Cluster-51324.126165	Cluster-51324.114394				Cluster-51324.89457
Cluster-51324.122746		Cluster-51324.105626							Cluster-51324.17779			Cluster-51324.142891	Cluster-51324.92581	Cluster-51324.74522				Cluster-51324.48765
Cluster-51324.90308		Cluster-51324.78242							Cluster-51324.75356			Cluster-51324.51274	Cluster-51324.89146	Cluster-51324.100959				Cluster-51324.119636
Cluster-51324.57010		Cluster-51324.77896							Cluster-51324.46406			Cluster-51324.50230	Cluster-51324.102313	Cluster-51324.99989				Cluster-51324.127106
Cluster-51324.82137		Cluster-51324.97290							Cluster-51324.123759			Cluster-51324.50930	Cluster-51324.110962	Cluster-51324.81664				Cluster-51324.69868
Cluster-51324.93753		Cluster-51324.125042							Cluster-51324.68140			Cluster-51324.160434	Cluster-51324.75278	Cluster-51324.84935				Cluster-51324.62948
Cluster-51324.94621		Cluster-51324.97150							Cluster-51324.93387			Cluster-51324.50429	Cluster-51324.85474	Cluster-51324.64445				Cluster-51324.90336
Cluster-51324.81243		Cluster-51324.60955							Cluster-51324.111180			Cluster-51324.160929	Cluster-51324.102667	Cluster-51324.68147				Cluster-51324.86347
Cluster-51324.89474		Cluster-51324.126268							Cluster-51324.42878			Cluster-51324.142319	Cluster-51324.94471	Cluster-51324.102586				Cluster-51324.147602
Cluster-51324.88391		Cluster-51324.59592							Cluster-51324.101512			Cluster-51324.67549	Cluster-51324.101992	Cluster-51324.100881				Cluster-51324.97757
Cluster-51324.57078		Cluster-51324.195395							Cluster-51324.59320			Cluster-51324.53639	Cluster-51324.99187	Cluster-51324.113718				Cluster-51324.46354
Cluster-51324.123853		Cluster-51324.82181							Cluster-51324.90723			Cluster-51324.96433	Cluster-51324.102327	Cluster-51324.137002				Cluster-51324.89348
Cluster-51324.36560		Cluster-51324.95162							Cluster-51324.115378			Cluster-51324.93743	Cluster-51324.96457	Cluster-51324.73274				Cluster-51324.67658
Cluster-51324.121664		Cluster-51324.98988							Cluster-51324.99770			Cluster-51324.52180	Cluster-51324.109775	Cluster-51324.79701				Cluster-51324.101341
Cluster-51324.106237		Cluster-51324.103467							Cluster-51324.150650			Cluster-51324.47081	Cluster-51324.94184	Cluster-51324.127311				Cluster-51324.96356
Cluster-51324.87261		Cluster-51324.134678							Cluster-51324.144567			Cluster-51324.146768	Cluster-51324.93849	Cluster-51324.115691				Cluster-51324.110468
Cluster-51324.119934		Cluster-51324.62822							Cluster-51324.56958			Cluster-51324.80386	Cluster-51324.153865	Cluster-51324.91666				Cluster-51324.108045
Cluster-51324.123511		Cluster-51324.76039							Cluster-51324.54324			Cluster-51324.150502	Cluster-51324.89944	Cluster-51324.72106				Cluster-51324.120717
Cluster-51324.65451		Cluster-51324.71604							Cluster-51324.105165			Cluster-51324.94091	Cluster-51324.94388	Cluster-51324.120552				Cluster-51324.98651
Cluster-51324.94904		Cluster-51324.129006							Cluster-51324.82581			Cluster-51324.35030	Cluster-51324.92193	Cluster-51324.75828				Cluster-51324.53677
Cluster-51324.87939		Cluster-51324.103940							Cluster-17512.0			Cluster-51324.145985	Cluster-51324.122512	Cluster-51324.148620				Cluster-51324.106257
Cluster-51324.75906		Cluster-51324.42561							Cluster-51324.77323			Cluster-51324.158288	Cluster-51324.110532	Cluster-51324.88752				Cluster-51324.74640
Cluster-51324.50016		Cluster-51324.86233							Cluster-51324.26474			Cluster-51324.52326	Cluster-51324.54961	Cluster-51324.132877				Cluster-51324.92475
Cluster-51324.123945		Cluster-51324.166363							Cluster-51324.94752			Cluster-51324.66221	Cluster-51324.80687	Cluster-51324.141564				Cluster-51324.84955
Cluster-51324.90923		Cluster-51324.113252							Cluster-51324.81509			Cluster-51324.44294	Cluster-51324.130172	Cluster-51324.156297				Cluster-51324.62614
Cluster-51324.112360		Cluster-51324.94461							Cluster-51324.167551			Cluster-51324.54090	Cluster-51324.92794	Cluster-51324.52399				Cluster-51324.53135
Cluster-51324.90877		Cluster-51324.100625							Cluster-51324.44432			Cluster-51324.160014	Cluster-51324.78893	Cluster-51324.127822				Cluster-51324.107090
Cluster-51324.130139		Cluster-51324.75971							Cluster-51324.140490			Cluster-51324.102068	Cluster-51324.94118	Cluster-51324.96225				Cluster-51324.158450
Cluster-51324.141035		Cluster-51324.114641							Cluster-51324.144570			Cluster-51324.44611	Cluster-51324.83227	Cluster-51324.108254				Cluster-51324.116942
Cluster-51324.141405		Cluster-51324.77814							Cluster-51324.86996			Cluster-51324.130734	Cluster-51324.89994	Cluster-51324.84378				Cluster-51324.87739
Cluster-51324.126349		Cluster-51324.102610							Cluster-51324.105531			Cluster-51324.89000	Cluster-51324.75189	Cluster-51324.70796				Cluster-51324.144707
Cluster-51324.95304		Cluster-51324.92522							Cluster-51324.91096			Cluster-51324.203454	Cluster-51324.80792	Cluster-51324.95597				Cluster-51324.93815
Cluster-51324.90320		Cluster-51324.84758							Cluster-51324.145621			Cluster-51324.40269	Cluster-51324.84275	Cluster-51324.178186				Cluster-51324.131271
Cluster-51324.107543		Cluster-51324.134928							Cluster-51324.90375			Cluster-51324.143443	Cluster-51324.82399	Cluster-51324.159257				Cluster-51324.114304
Cluster-51324.97510		Cluster-51324.91168							Cluster-51324.47437			Cluster-51324.46337	Cluster-51324.94045	Cluster-51324.89316				Cluster-51324.103109
Cluster-51324.67998		Cluster-51324.148837							Cluster-51324.136622			Cluster-51324.53490	Cluster-51324.101877	Cluster-51324.104137				Cluster-51324.98253
Cluster-51324.89599		Cluster-51324.76037							Cluster-51324.54452			Cluster-51324.57458	Cluster-51324.88068	Cluster-51324.158733				Cluster-51324.96369
Cluster-51324.149358		Cluster-51324.107628							Cluster-51324.124075			Cluster-51324.105696	Cluster-51324.94406	Cluster-51324.97095				Cluster-51324.79904
Cluster-51324.56293		Cluster-51324.100657							Cluster-51324.89378			Cluster-51324.51558	Cluster-51324.94192	Cluster-51324.106785				Cluster-51324.101395
Cluster-51324.144010		Cluster-51324.139635							Cluster-51324.77892			Cluster-51324.119868	Cluster-51324.89972	Cluster-51324.46097				Cluster-51324.88288
Cluster-51324.80278		Cluster-51324.153867							Cluster-51324.106728			Cluster-51324.120969	Cluster-51324.93675	Cluster-51324.97107				Cluster-51324.96771
Cluster-51324.101585		Cluster-51324.107262							Cluster-51324.29512			Cluster-51324.49671	Cluster-51324.67690	Cluster-51324.65542				Cluster-51324.132461
Cluster-51324.107516		Cluster-51324.136591							Cluster-51324.87115			Cluster-51324.87171	Cluster-51324.93242	Cluster-51324.155948				Cluster-51324.109826
Cluster-51324.88944		Cluster-51324.96224							Cluster-51324.136272			Cluster-51324.149420	Cluster-51324.90617	Cluster-51324.50254				Cluster-51324.96237
Cluster-51324.100191		Cluster-51324.151716							Cluster-51324.151320			Cluster-51324.141198	Cluster-51324.94101	Cluster-51324.94259				Cluster-51324.138317
Cluster-51324.95510		Cluster-51324.99477							Cluster-51324.71703			Cluster-51324.177174	Cluster-51324.83287	Cluster-51324.118958				Cluster-51324.93913
Cluster-51324.125083		Cluster-51324.116659							Cluster-51324.93812			Cluster-51324.142631	Cluster-51324.109269	Cluster-51324.75412				Cluster-51324.53840
Cluster-51324.96503		Cluster-51324.74527							Cluster-51324.111245			Cluster-51324.155115	Cluster-51324.94447	Cluster-51324.126697				Cluster-51324.121528
Cluster-51324.92866		Cluster-51324.61535							Cluster-51324.89094			Cluster-51324.107563	Cluster-51324.79302	Cluster-51324.145201				Cluster-51324.48476
Cluster-51324.95649		Cluster-51324.82813							Cluster-51324.94576			Cluster-51324.62006	Cluster-51324.144550	Cluster-51324.135420				Cluster-51324.117070
Cluster-51324.122919		Cluster-51324.76795							Cluster-51324.68291			Cluster-51324.82103	Cluster-51324.98341	Cluster-51324.47491				Cluster-51324.145196
Cluster-51324.101290		Cluster-51324.73224							Cluster-51324.123929			Cluster-51324.144253	Cluster-51324.99902	Cluster-51324.64120				Cluster-51324.78838
Cluster-51324.63977		Cluster-51324.79819							Cluster-51324.97686			Cluster-51324.162886	Cluster-51324.94028	Cluster-51324.75408				Cluster-51324.47339
Cluster-51324.108353		Cluster-51324.86594							Cluster-51324.118960			Cluster-51324.66148	Cluster-51324.53335	Cluster-51324.67768				Cluster-51324.55910
Cluster-51324.154648		Cluster-51324.185244							Cluster-51324.103849			Cluster-51324.43882	Cluster-51324.96799	Cluster-51324.77239				Cluster-51324.100435
Cluster-51324.77238		Cluster-51324.82925							Cluster-51324.106771			Cluster-51324.105640	Cluster-51324.90727	Cluster-51324.128494				Cluster-51324.44530
Cluster-51324.19162		Cluster-51324.130785							Cluster-51324.87665			Cluster-51324.30698	Cluster-51324.96193	Cluster-51324.51878				Cluster-51324.64720
Cluster-51324.84295		Cluster-51324.94673							Cluster-51324.105751			Cluster-51324.117386	Cluster-51324.56100	Cluster-51324.74316				Cluster-51324.47974
Cluster-51324.54129		Cluster-51324.135905							Cluster-51324.137719			Cluster-51324.137544	Cluster-51324.94694	Cluster-51324.86492				Cluster-51324.101607
Cluster-51324.110710		Cluster-51324.116191							Cluster-51324.81331			Cluster-51324.99858	Cluster-51324.91927	Cluster-51324.100683				Cluster-51324.50075
Cluster-51324.83574		Cluster-51324.99001							Cluster-51324.126442			Cluster-51324.156046	Cluster-51324.71427	Cluster-51324.133456				Cluster-51324.69032
Cluster-51324.74487		Cluster-51324.108495							Cluster-51324.68210			Cluster-51324.91939	Cluster-51324.109713	Cluster-51324.118926				Cluster-51324.85830
Cluster-51324.114658		Cluster-51324.176359							Cluster-51324.52814			Cluster-51324.142585	Cluster-51324.62034	Cluster-51324.144906				Cluster-51324.136077
Cluster-51324.95864		Cluster-51324.61875							Cluster-51324.122085			Cluster-51324.85914	Cluster-51324.93976	Cluster-51324.142479				Cluster-51324.85642
Cluster-51324.92712		Cluster-51324.95881							Cluster-51324.117298			Cluster-51324.28301	Cluster-51324.95317	Cluster-51324.122011				Cluster-51324.119150
Cluster-51324.95550		Cluster-51324.91670							Cluster-51324.82629			Cluster-51324.67137	Cluster-51324.110575	Cluster-51324.72027				Cluster-51324.68941
Cluster-51324.106054		Cluster-51324.158563							Cluster-51324.24872			Cluster-51324.29161	Cluster-51324.92932	Cluster-51324.131185				Cluster-51324.132322
Cluster-51324.62427		Cluster-51324.100952							Cluster-51324.103835			Cluster-51324.99727	Cluster-51324.98423	Cluster-51324.72672				Cluster-51324.54592
Cluster-51324.48334		Cluster-51324.140052							Cluster-51324.108571			Cluster-51324.115427	Cluster-51324.134354	Cluster-51324.100659				Cluster-51324.120650
Cluster-51324.51788		Cluster-51324.82887							Cluster-51324.99774			Cluster-51324.5193	Cluster-51324.105162	Cluster-51324.152913				Cluster-51324.125199
Cluster-51324.129197		Cluster-51324.139047							Cluster-51324.120073			Cluster-51324.51170	Cluster-51324.92011	Cluster-51324.99039				Cluster-51324.73291
Cluster-51324.120796		Cluster-51324.112355							Cluster-51324.94114			Cluster-51324.61338	Cluster-51324.100151	Cluster-51324.81047				Cluster-51324.81760
Cluster-51324.92648		Cluster-51324.120837							Cluster-51324.96290			Cluster-51324.85344	Cluster-51324.90878	Cluster-51324.138863				Cluster-51324.97629
Cluster-51324.70512		Cluster-51324.67459							Cluster-51324.93669			Cluster-51324.94613	Cluster-51324.90031	Cluster-51324.113651				Cluster-51324.164618
Cluster-51324.109290		Cluster-51324.146652							Cluster-51324.43125			Cluster-51324.108630	Cluster-51324.65749	Cluster-51324.173271				Cluster-51324.112849
Cluster-51324.95311		Cluster-51324.48457							Cluster-51324.62667			Cluster-51324.79824	Cluster-51324.86175	Cluster-51324.130758				Cluster-51324.150649
Cluster-51324.93764		Cluster-51324.111124							Cluster-51324.146495			Cluster-51324.143209	Cluster-51324.51478	Cluster-51324.102919				Cluster-51324.111461
Cluster-51324.139139		Cluster-51324.74334							Cluster-51324.115351			Cluster-51324.151426	Cluster-51324.94916	Cluster-51324.163349				Cluster-51324.112896
Cluster-51324.155346		Cluster-51324.86555							Cluster-51324.30048			Cluster-51324.94425	Cluster-51324.83649	Cluster-51324.102077				Cluster-51324.102043
Cluster-51324.107886		Cluster-51324.121710							Cluster-51324.132597			Cluster-51324.131899	Cluster-51324.132832	Cluster-51324.69065				Cluster-51324.94463
Cluster-51324.16660		Cluster-51324.88108							Cluster-51324.98872			Cluster-51324.144246	Cluster-51324.106287	Cluster-51324.109483				Cluster-51324.72846
Cluster-51324.123075		Cluster-51324.88530							Cluster-51324.155205			Cluster-51324.50378	Cluster-51324.56227	Cluster-51324.100292				Cluster-51324.69328
Cluster-51324.100221		Cluster-51324.56605							Cluster-51324.85999			Cluster-51324.143121	Cluster-51324.39016	Cluster-51324.126234				Cluster-51324.69627
Cluster-51324.56874		Cluster-51324.83237							Cluster-51324.115704			Cluster-51324.168870	Cluster-51324.64238	Cluster-51324.108567				Cluster-51324.83259
Cluster-51324.167776		Cluster-51324.43763							Cluster-51324.87433			Cluster-51324.42491	Cluster-51324.94702	Cluster-51324.68644				Cluster-51324.94716
Cluster-51324.78091		Cluster-51324.137045							Cluster-51324.102028			Cluster-51324.44793	Cluster-51324.91382	Cluster-51324.93027				Cluster-51324.71286
Cluster-51324.93952		Cluster-51324.97700							Cluster-51324.102652			Cluster-51324.104481	Cluster-51324.93623	Cluster-51324.82747				Cluster-51324.92443
Cluster-51324.119077		Cluster-51324.109741							Cluster-51324.54371			Cluster-51324.67596	Cluster-51324.91940	Cluster-51324.71741				Cluster-51324.113792
Cluster-51324.112410		Cluster-51324.124332							Cluster-51324.105156			Cluster-51324.90589	Cluster-51324.121304	Cluster-51324.108124				Cluster-51324.110357
Cluster-51324.52939		Cluster-51324.7860							Cluster-51324.34623			Cluster-51324.149051	Cluster-51324.94527	Cluster-51324.89749				Cluster-51324.40754
Cluster-51324.87104		Cluster-51324.38244							Cluster-51324.143419			Cluster-51324.91518	Cluster-51324.90774	Cluster-51324.124459				Cluster-51324.69030
Cluster-51324.114605		Cluster-51324.123375							Cluster-51324.97637			Cluster-51324.128642	Cluster-51324.88896	Cluster-51324.92489				Cluster-51324.104752
Cluster-51324.112570		Cluster-51324.125555							Cluster-51324.99676			Cluster-51324.134345	Cluster-51324.125341	Cluster-51324.142822				Cluster-51324.35776
Cluster-51324.98336		Cluster-51324.70737							Cluster-51324.193606			Cluster-51324.54069	Cluster-51324.97784	Cluster-51324.108827				Cluster-51324.118026
Cluster-51324.149372		Cluster-51324.154696							Cluster-51324.69708			Cluster-51324.50524	Cluster-51324.108432	Cluster-51324.86328				Cluster-51324.66696
Cluster-51324.113237		Cluster-51324.61908							Cluster-51324.104107			Cluster-51324.72178	Cluster-51324.104371	Cluster-51324.121174				Cluster-51324.173021
Cluster-51324.97967		Cluster-51324.127680							Cluster-51324.89727			Cluster-51324.164067	Cluster-51324.90761	Cluster-51324.121424				Cluster-51324.94201
Cluster-51324.95972		Cluster-51324.98511							Cluster-51324.92843			Cluster-51324.107330	Cluster-51324.142354	Cluster-51324.79942				Cluster-51324.84351
Cluster-51324.100364		Cluster-51324.105787							Cluster-51324.47893			Cluster-51324.166751	Cluster-51324.51278	Cluster-51324.91663				Cluster-51324.131833
Cluster-51324.90210		Cluster-51324.98054							Cluster-51324.145462			Cluster-51324.53596	Cluster-51324.50291	Cluster-51324.72020				Cluster-51324.45745
Cluster-51324.98707		Cluster-51324.99975							Cluster-51324.98480			Cluster-51324.141174	Cluster-51324.93175	Cluster-51324.89191				Cluster-51324.80910
Cluster-51324.150090		Cluster-51324.127198							Cluster-51324.125557			Cluster-51324.58232	Cluster-51324.81897	Cluster-51324.110510				Cluster-51324.71360
Cluster-51324.136303		Cluster-51324.100251							Cluster-51324.83932			Cluster-51324.141422	Cluster-51324.22598	Cluster-51324.103317				Cluster-51324.64795
Cluster-51324.82162		Cluster-51324.91452							Cluster-51324.126185			Cluster-51324.93829	Cluster-51324.73798	Cluster-51324.103088				Cluster-51324.71193
Cluster-51324.84234		Cluster-51324.102637							Cluster-51324.110520			Cluster-51324.149123	Cluster-51324.101391	Cluster-51324.79887				Cluster-51324.111621
Cluster-51324.90947		Cluster-51324.99170							Cluster-51324.82237			Cluster-51324.42331	Cluster-51324.70901	Cluster-51324.101997				Cluster-51324.118795
Cluster-51324.51064		Cluster-51324.93312							Cluster-51324.83950			Cluster-51324.53997	Cluster-51324.72049	Cluster-51324.94095				Cluster-51324.79479
Cluster-51324.115747		Cluster-51324.136967							Cluster-51324.71047			Cluster-51324.48592	Cluster-51324.96474	Cluster-51324.125597				Cluster-51324.75180
Cluster-51324.167909		Cluster-51324.118736							Cluster-51324.93653			Cluster-51324.52624	Cluster-51324.169348	Cluster-51324.143984				Cluster-51324.107841
Cluster-51324.91313		Cluster-51324.115366							Cluster-51324.94111			Cluster-51324.111609	Cluster-51324.124501	Cluster-51324.126672				Cluster-51324.145482
Cluster-51324.76370		Cluster-51324.118714							Cluster-51324.132950			Cluster-51324.51543	Cluster-51324.109175	Cluster-51324.106743				Cluster-51324.88689
Cluster-51324.132389		Cluster-51324.118257							Cluster-51324.138029			Cluster-51324.46107	Cluster-51324.88955	Cluster-51324.92554				Cluster-51324.83674
Cluster-51324.30378		Cluster-51324.107193							Cluster-51324.156901			Cluster-51324.159182	Cluster-51324.100983	Cluster-51324.173685				Cluster-51324.147071
Cluster-51324.81842		Cluster-51324.122087							Cluster-51324.50535			Cluster-51324.50078	Cluster-51324.111370	Cluster-51324.113275				Cluster-51324.94147
Cluster-51324.93480		Cluster-51324.71553							Cluster-51324.85413			Cluster-51324.77583	Cluster-51324.105854	Cluster-51324.49600				Cluster-51324.92811
Cluster-51324.78876		Cluster-51324.187732							Cluster-51324.89755			Cluster-51324.95109	Cluster-51324.72563	Cluster-51324.99990				Cluster-51324.130869
Cluster-51324.86276		Cluster-51324.90519							Cluster-51324.95470			Cluster-51324.43957	Cluster-51324.137125	Cluster-51324.95024				Cluster-51324.100567
Cluster-51324.92402		Cluster-51324.66429							Cluster-51324.114273			Cluster-51324.161250	Cluster-51324.97164	Cluster-51324.49647				Cluster-51324.89756
Cluster-51324.114037		Cluster-51324.134832							Cluster-51324.104175			Cluster-51324.54666	Cluster-51324.66106	Cluster-51324.102581				Cluster-51324.89435
Cluster-51324.91993		Cluster-51324.141479							Cluster-51324.50446			Cluster-51324.207904	Cluster-51324.77533	Cluster-51324.83961				Cluster-51324.38839
Cluster-51324.97606		Cluster-51324.87174							Cluster-51324.128232			Cluster-51324.103718	Cluster-51324.55176	Cluster-51324.90700				Cluster-51324.92960
Cluster-51324.120885		Cluster-51324.87365							Cluster-51324.121057			Cluster-51324.49333	Cluster-51324.112920	Cluster-51324.80994				Cluster-51324.91662
Cluster-51324.67908		Cluster-51324.116427							Cluster-51324.52463			Cluster-51324.47967	Cluster-51324.163961	Cluster-51324.88636				Cluster-51324.78923
Cluster-51324.64620		Cluster-51324.98026							Cluster-51324.15692			Cluster-51324.75441	Cluster-51324.15663	Cluster-51324.78346				Cluster-51324.173599
Cluster-51324.34326		Cluster-51324.74605							Cluster-51324.93271			Cluster-51324.152772	Cluster-51324.94165	Cluster-51324.127699				Cluster-51324.54593
Cluster-51324.87130		Cluster-51324.106230							Cluster-51324.123028			Cluster-51324.170342	Cluster-51324.105555	Cluster-51324.175185				Cluster-51324.104272
Cluster-51324.63552		Cluster-51324.136532							Cluster-51324.110647			Cluster-51324.152137	Cluster-51324.129349	Cluster-51324.77938				Cluster-51324.88263
Cluster-51324.99419		Cluster-51324.104007							Cluster-51324.60508			Cluster-51324.52179	Cluster-51324.62610	Cluster-51324.49378				Cluster-51324.15086
Cluster-51324.48101		Cluster-51324.108035							Cluster-51324.93170			Cluster-51324.30579	Cluster-51324.76655	Cluster-51324.104165				Cluster-51324.92827
Cluster-51324.110999		Cluster-51324.88810							Cluster-51324.35823			Cluster-51324.144587	Cluster-51324.89184	Cluster-51324.50289				Cluster-51324.82093
Cluster-51324.101406		Cluster-51324.99811							Cluster-51324.51837			Cluster-51324.62448	Cluster-51324.160458	Cluster-51324.19364				Cluster-51324.143845
Cluster-51324.98112		Cluster-51324.56787							Cluster-51324.142760			Cluster-51324.166304	Cluster-51324.89240	Cluster-51324.73042				Cluster-51324.117962
Cluster-51324.52216		Cluster-51324.98831							Cluster-51324.70011			Cluster-51324.45820	Cluster-51324.104194	Cluster-51324.119240				Cluster-51324.78120
Cluster-51324.95117		Cluster-51324.74185							Cluster-51324.67680			Cluster-51324.51245	Cluster-51324.95408	Cluster-51324.66282				Cluster-51324.95013
Cluster-51324.95095		Cluster-51324.95452							Cluster-51324.43326			Cluster-51324.78502	Cluster-51324.94550	Cluster-51324.147434				Cluster-51324.93720
Cluster-51324.65750		Cluster-51324.94443							Cluster-51324.90650			Cluster-51324.98668	Cluster-51324.82269	Cluster-51324.69377				Cluster-51324.142229
Cluster-51324.56211		Cluster-51324.95279							Cluster-51324.86688			Cluster-51324.143874	Cluster-51324.89566	Cluster-51324.127442				Cluster-51324.158565
Cluster-51324.113747		Cluster-51324.83353							Cluster-51324.57918			Cluster-51324.38524	Cluster-51324.78009	Cluster-51324.79832				Cluster-51324.69961
Cluster-51324.85783		Cluster-51324.57191							Cluster-51324.118470			Cluster-51324.65318	Cluster-51324.96524	Cluster-51324.122781				Cluster-51324.73200
Cluster-51324.124331		Cluster-51324.85822							Cluster-51324.110935			Cluster-51324.150077	Cluster-51324.94438	Cluster-51324.82249				Cluster-51324.156076
Cluster-51324.105218		Cluster-51324.101697							Cluster-51324.92867			Cluster-51324.102741	Cluster-51324.111162	Cluster-51324.129250				Cluster-51324.61969
Cluster-51324.97431		Cluster-51324.8769							Cluster-51324.79687			Cluster-51324.64779	Cluster-51324.104352	Cluster-51324.158253				Cluster-51324.149374
Cluster-51324.94456		Cluster-51324.140403							Cluster-51324.83361			Cluster-51324.135085	Cluster-51324.95122	Cluster-51324.79180				Cluster-51324.48766
Cluster-51324.145427		Cluster-51324.95558							Cluster-51324.103460			Cluster-51324.52471	Cluster-51324.103593	Cluster-51324.73830				Cluster-51324.96126
Cluster-51324.168560		Cluster-51324.77616							Cluster-51324.50074			Cluster-51324.115501	Cluster-51324.105604	Cluster-51324.86963				Cluster-51324.99563
Cluster-51324.82751		Cluster-51324.123465							Cluster-51324.76858			Cluster-51324.37988	Cluster-51324.94779	Cluster-51324.101456				Cluster-51324.72630
Cluster-51324.55784		Cluster-51324.76866							Cluster-51324.89268			Cluster-51324.61452	Cluster-51324.112910	Cluster-51324.84214				Cluster-51324.99943
Cluster-51324.89882		Cluster-51324.168382							Cluster-51324.93173			Cluster-51324.53489	Cluster-51324.93166	Cluster-51324.96981				Cluster-51324.109110
Cluster-51324.138028		Cluster-51324.7601							Cluster-51324.150088			Cluster-51324.142386	Cluster-51324.87484	Cluster-51324.100979				Cluster-51324.90063
Cluster-51324.110207		Cluster-51324.44184							Cluster-51324.75093			Cluster-51324.108635	Cluster-51324.65186	Cluster-51324.93051				Cluster-51324.86738
Cluster-51324.93188		Cluster-51324.77021							Cluster-51324.136680			Cluster-51324.151571	Cluster-51324.90093	Cluster-51324.61167				Cluster-51324.141455
Cluster-51324.127157		Cluster-51324.102983							Cluster-51324.121531			Cluster-51324.143471	Cluster-51324.80572	Cluster-51324.105705				Cluster-51324.85285
Cluster-51324.87147		Cluster-51324.85015							Cluster-51324.95759			Cluster-51324.104567	Cluster-51324.82798	Cluster-51324.170503				Cluster-51324.63255
Cluster-51324.63852		Cluster-51324.147499							Cluster-51324.100452			Cluster-51324.7277	Cluster-51324.94566	Cluster-51324.111027				Cluster-51324.52087
Cluster-51324.90580		Cluster-51324.84813							Cluster-51324.97936			Cluster-51324.161110	Cluster-51324.74429	Cluster-51324.52839				Cluster-51324.78321
Cluster-51324.103844		Cluster-51324.44427							Cluster-51324.110485			Cluster-51324.92792	Cluster-51324.100521	Cluster-51324.89947				Cluster-51324.89032
Cluster-51324.132839		Cluster-51324.130783							Cluster-51324.142820			Cluster-51324.152864	Cluster-51324.92891	Cluster-51324.96192				Cluster-51324.43496
Cluster-51324.107274		Cluster-51324.137956							Cluster-51324.157739			Cluster-51324.113571	Cluster-51324.76128	Cluster-51324.142083				Cluster-51324.55672
Cluster-51324.90667		Cluster-51324.140289							Cluster-51324.64826			Cluster-51324.202350	Cluster-51324.114464	Cluster-51324.89339				Cluster-51324.57321
Cluster-51324.73684		Cluster-51324.98449							Cluster-51324.146762			Cluster-51324.75773	Cluster-51324.96659	Cluster-51324.113279				Cluster-51324.65352
Cluster-51324.110448		Cluster-51324.94697							Cluster-51324.94615			Cluster-51324.60116	Cluster-51324.51486	Cluster-51324.63878				Cluster-51324.99585
Cluster-51324.82091		Cluster-51324.71172							Cluster-51324.168574			Cluster-51324.91760	Cluster-51324.112164	Cluster-51324.86676				Cluster-51324.105184
Cluster-51324.110421		Cluster-51324.124426							Cluster-51324.97323			Cluster-51324.52146	Cluster-51324.94810	Cluster-51324.53928				Cluster-51324.14866
Cluster-51324.77002		Cluster-51324.78888							Cluster-51324.74474			Cluster-51324.150751	Cluster-51324.91010	Cluster-51324.132355				Cluster-51324.77885
Cluster-51324.113618		Cluster-51324.71258							Cluster-51324.111391			Cluster-51324.143869	Cluster-51324.88848	Cluster-51324.103401				Cluster-51324.91751
Cluster-51324.85645		Cluster-51324.111102							Cluster-51324.139677			Cluster-51324.53295	Cluster-51324.102316	Cluster-51324.115796				Cluster-51324.110386
Cluster-51324.112472		Cluster-51324.106299							Cluster-51324.57455			Cluster-51324.144511	Cluster-51324.95956	Cluster-51324.91018				Cluster-51324.96357
Cluster-51324.82058		Cluster-51324.119197							Cluster-51324.106355			Cluster-51324.90004	Cluster-51324.164118	Cluster-51324.89761				Cluster-51324.119287
Cluster-51324.73964		Cluster-51324.115299							Cluster-51324.56318			Cluster-51324.54417	Cluster-51324.127064	Cluster-51324.101939				Cluster-51324.82816
Cluster-51324.97714		Cluster-51324.131925							Cluster-51324.114072			Cluster-51324.127706	Cluster-51324.74169	Cluster-51324.51616				Cluster-51324.99790
Cluster-51324.109648		Cluster-51324.114050							Cluster-51324.112262			Cluster-51324.87486	Cluster-51324.94583	Cluster-51324.77251				Cluster-51324.78468
Cluster-51324.142037		Cluster-51324.130493							Cluster-51324.94671			Cluster-51324.103221	Cluster-51324.85972	Cluster-51324.131611				Cluster-51324.161650
Cluster-51324.89878		Cluster-51324.95225							Cluster-51324.88779			Cluster-51324.151058	Cluster-51324.95418	Cluster-51324.136711				Cluster-51324.117490
Cluster-51324.84242		Cluster-51324.111259							Cluster-51324.142759			Cluster-51324.17292	Cluster-51324.86232	Cluster-51324.78368				Cluster-51324.120000
Cluster-51324.110249		Cluster-51324.94434							Cluster-51324.102767			Cluster-51324.55854	Cluster-51324.97076	Cluster-51324.126928				Cluster-51324.130566
Cluster-51324.92678		Cluster-51324.92950							Cluster-51324.104070			Cluster-51324.108395	Cluster-51324.110361	Cluster-51324.76044				Cluster-51324.41247
Cluster-51324.51894		Cluster-51324.129864							Cluster-51324.143651			Cluster-51324.49224	Cluster-51324.110143	Cluster-51324.36223				Cluster-51324.134353
Cluster-51324.74920		Cluster-51324.91265							Cluster-51324.50854			Cluster-51324.53326	Cluster-51324.96464	Cluster-51324.99743				Cluster-51324.98517
Cluster-51324.126520		Cluster-51324.92923							Cluster-51324.122962			Cluster-51324.144807	Cluster-51324.88430	Cluster-51324.34364				Cluster-51324.52139
Cluster-51324.84331		Cluster-51324.143738							Cluster-51324.90791			Cluster-51324.148578	Cluster-51324.107184	Cluster-51324.80854				Cluster-51324.103353
Cluster-51324.141339		Cluster-51324.83521							Cluster-51324.26189			Cluster-51324.151012	Cluster-51324.109614	Cluster-51324.105743				Cluster-51324.62532
Cluster-51324.128015		Cluster-51324.67272							Cluster-51324.64518			Cluster-51324.108570	Cluster-51324.61316	Cluster-51324.116569				Cluster-51324.149057
Cluster-51324.168341		Cluster-51324.55976							Cluster-51324.95703			Cluster-51324.74546	Cluster-51324.96480	Cluster-51324.58444				Cluster-51324.157439
Cluster-51324.115025		Cluster-51324.107141							Cluster-51324.130784			Cluster-51324.51525	Cluster-51324.88829	Cluster-51324.91112				Cluster-51324.87797
Cluster-51324.98356		Cluster-51324.82838							Cluster-51324.53845			Cluster-51324.64979	Cluster-51324.87980	Cluster-51324.76791				Cluster-51324.96866
Cluster-51324.131343		Cluster-51324.64597							Cluster-51324.126558			Cluster-51324.132604	Cluster-51324.60471	Cluster-51324.94236				Cluster-51324.88345
Cluster-51324.107788		Cluster-51324.112944							Cluster-51324.93252			Cluster-51324.145965	Cluster-51324.122539	Cluster-51324.88441				Cluster-51324.25295
Cluster-51324.63294		Cluster-51324.105050							Cluster-51324.38439			Cluster-51324.12014	Cluster-51324.76210	Cluster-51324.144044				Cluster-51324.67210
Cluster-51324.100411		Cluster-51324.38373							Cluster-51324.46408			Cluster-51324.141579	Cluster-51324.87938	Cluster-51324.49662				Cluster-51324.106876
Cluster-51324.28003		Cluster-51324.67541							Cluster-51324.143350			Cluster-51324.53179	Cluster-51324.100570	Cluster-51324.94308				Cluster-51324.130985
Cluster-51324.105300		Cluster-51324.93610							Cluster-51324.81640			Cluster-51324.97743	Cluster-51324.82691	Cluster-51324.87907				Cluster-51324.74596
Cluster-51324.118418		Cluster-51324.113605							Cluster-51324.89204			Cluster-51324.141032	Cluster-51324.67503	Cluster-51324.115713				Cluster-51324.86015
Cluster-51324.92140		Cluster-51324.149435							Cluster-51324.44704			Cluster-51324.89466	Cluster-51324.88937	Cluster-51324.78676				Cluster-51324.139013
Cluster-51324.80707		Cluster-51324.152681							Cluster-51324.87051			Cluster-51324.38623	Cluster-51324.44466	Cluster-51324.100100				Cluster-51324.73891
Cluster-51324.74827		Cluster-51324.149109							Cluster-51324.95735			Cluster-51324.151576	Cluster-51324.105950	Cluster-51324.88040				Cluster-51324.82554
Cluster-51324.158457		Cluster-51324.105338							Cluster-51324.141103			Cluster-51324.141025	Cluster-51324.105732	Cluster-51324.102654				Cluster-51324.114904
Cluster-51324.84954		Cluster-51324.108256							Cluster-51324.55137			Cluster-51324.50430	Cluster-51324.84963	Cluster-51324.90380				Cluster-51324.109695
Cluster-51324.85281		Cluster-51324.85033							Cluster-51324.99161			Cluster-51324.105195	Cluster-51324.60246	Cluster-51324.92766				Cluster-51324.55826
Cluster-51324.190018		Cluster-51324.100022							Cluster-51324.64578			Cluster-51324.45049	Cluster-51324.107366	Cluster-51324.158125				Cluster-51324.117429
Cluster-51324.98563		Cluster-51324.94255							Cluster-51324.88919			Cluster-51324.74691	Cluster-51324.147488	Cluster-51324.114266				Cluster-51324.93171
Cluster-51324.110011		Cluster-51324.117381							Cluster-51324.46681			Cluster-51324.142775	Cluster-51324.99201	Cluster-51324.116509				Cluster-51324.137546
Cluster-51324.134612		Cluster-51324.135792							Cluster-51324.150154			Cluster-51324.38688	Cluster-51324.111197	Cluster-51324.58661				Cluster-51324.149154
Cluster-51324.145373		Cluster-51324.129862							Cluster-51324.156822			Cluster-51324.45394	Cluster-51324.92910	Cluster-51324.75513				Cluster-51324.173180
Cluster-51324.76187		Cluster-51324.174851							Cluster-51324.68602			Cluster-51324.82886	Cluster-51324.91132	Cluster-51324.87703				Cluster-51324.134309
Cluster-51324.86898		Cluster-51324.94571							Cluster-51324.134019			Cluster-51324.145448	Cluster-51324.76658	Cluster-51324.75551				Cluster-51324.110248
Cluster-51324.89886		Cluster-51324.79910							Cluster-51324.100164			Cluster-51324.120460	Cluster-51324.74381	Cluster-51324.152996				Cluster-51324.83066
Cluster-51324.97347		Cluster-51324.76830							Cluster-51324.66359			Cluster-51324.159434	Cluster-51324.91893	Cluster-51324.140723				Cluster-51324.123886
Cluster-51324.93529		Cluster-51324.71649							Cluster-51324.54442			Cluster-51324.40270	Cluster-51324.121339	Cluster-51324.125973				Cluster-51324.91657
Cluster-51324.86895		Cluster-51324.82207							Cluster-51324.42351			Cluster-51324.44741	Cluster-51324.96994	Cluster-51324.144082				Cluster-51324.89655
Cluster-51324.126629		Cluster-51324.124245							Cluster-51324.53616			Cluster-51324.158568	Cluster-51324.101433	Cluster-51324.44636				Cluster-51324.109957
Cluster-51324.92286		Cluster-51324.95585							Cluster-51324.98558			Cluster-51324.64328	Cluster-51324.80232	Cluster-51324.108399				Cluster-51324.114381
Cluster-51324.96958		Cluster-51324.90695							Cluster-51324.100072			Cluster-51324.148576	Cluster-51324.95113	Cluster-51324.115795				Cluster-51324.60949
Cluster-51324.126682		Cluster-51324.86609							Cluster-51324.147455			Cluster-51324.88455	Cluster-51324.68874	Cluster-51324.69615				Cluster-51324.46666
Cluster-51324.94416		Cluster-51324.8978							Cluster-51324.47822			Cluster-51324.37511	Cluster-51324.105118	Cluster-51324.73558				Cluster-51324.114405
Cluster-51324.135527		Cluster-51324.89577							Cluster-51324.149427			Cluster-51324.148450	Cluster-51324.89897	Cluster-51324.101356				Cluster-51324.117631
Cluster-51324.99148		Cluster-51324.109636							Cluster-51324.96934			Cluster-51324.50087	Cluster-51324.100994	Cluster-51324.73039				Cluster-51324.86653
Cluster-51324.106780		Cluster-51324.148115							Cluster-51324.85406			Cluster-51324.95713	Cluster-51324.68715	Cluster-51324.58286				Cluster-51324.81907
Cluster-51324.156899		Cluster-51324.157149							Cluster-51324.56392			Cluster-51324.96757	Cluster-51324.97334	Cluster-51324.105091				Cluster-51324.80725
Cluster-51324.119880		Cluster-51324.48370							Cluster-51324.68302			Cluster-51324.120290	Cluster-51324.64430	Cluster-51324.49956				Cluster-51324.151601
Cluster-51324.84117		Cluster-51324.90570							Cluster-51324.85878			Cluster-51324.123906	Cluster-51324.97806	Cluster-51324.167830				Cluster-51324.124178
Cluster-51324.88317		Cluster-51324.88647							Cluster-51324.99382			Cluster-51324.149219	Cluster-51324.110858	Cluster-51324.73708				Cluster-51324.99877
Cluster-51324.94064		Cluster-51324.200537							Cluster-51324.73506			Cluster-51324.148731	Cluster-51324.82796	Cluster-51324.46228				Cluster-51324.110001
Cluster-51324.84948		Cluster-51324.197570							Cluster-51324.123497			Cluster-51324.142684	Cluster-51324.128610	Cluster-51324.85958				Cluster-51324.67418
Cluster-51324.87702		Cluster-51324.126071							Cluster-51324.14224			Cluster-51324.49120	Cluster-51324.91116	Cluster-51324.116764				Cluster-51324.93236
Cluster-51324.115881		Cluster-51324.60639							Cluster-51324.114976			Cluster-51324.148575	Cluster-51324.76278	Cluster-51324.86327				Cluster-51324.98438
Cluster-51324.78314		Cluster-51324.101269							Cluster-51324.102978			Cluster-51324.54537	Cluster-51324.123821	Cluster-51324.53334				Cluster-51324.93019
Cluster-51324.94318		Cluster-51324.85417							Cluster-51324.41489			Cluster-51324.144401	Cluster-51324.59872	Cluster-51324.108468				Cluster-51324.72385
Cluster-51324.61681		Cluster-51324.99810							Cluster-51324.67786			Cluster-51324.51660	Cluster-51324.81310	Cluster-51324.85284				Cluster-51324.54795
Cluster-51324.58704		Cluster-51324.77180							Cluster-51324.93862			Cluster-51324.87346	Cluster-51324.97913	Cluster-51324.118955				Cluster-51324.159625
Cluster-51324.91944		Cluster-51324.101268							Cluster-51324.72771			Cluster-51324.90556	Cluster-51324.95465	Cluster-51324.63167				Cluster-51324.100047
Cluster-51324.98138		Cluster-51324.35088							Cluster-51324.91711			Cluster-51324.107953	Cluster-51324.97571	Cluster-51324.113075				Cluster-51324.76964
Cluster-51324.37311		Cluster-51324.105347							Cluster-51324.78365			Cluster-51324.166149	Cluster-51324.92585	Cluster-51324.160287				Cluster-51324.63950
Cluster-51324.157641		Cluster-51324.89043							Cluster-51324.149971			Cluster-51324.89200	Cluster-51324.101389	Cluster-51324.113273				Cluster-51324.85133
Cluster-51324.95871		Cluster-51324.116087							Cluster-51324.68462			Cluster-51324.114520	Cluster-51324.90408	Cluster-51324.197095				Cluster-51324.71646
Cluster-51324.78971		Cluster-51324.106024							Cluster-51324.96513			Cluster-51324.126073	Cluster-51324.100459	Cluster-51324.30288				Cluster-51324.44465
Cluster-51324.71809		Cluster-51324.83718							Cluster-51324.33279			Cluster-51324.99222	Cluster-51324.92728	Cluster-51324.116300				Cluster-51324.94993
Cluster-51324.78897		Cluster-51324.134223							Cluster-51324.136717			Cluster-51324.70507	Cluster-51324.124641	Cluster-51324.144818				Cluster-51324.54812
Cluster-51324.142263		Cluster-51324.101483							Cluster-51324.163635			Cluster-51324.54498	Cluster-51324.53024	Cluster-51324.78109				Cluster-51324.92538
Cluster-51324.63474		Cluster-51324.68741							Cluster-51324.136002			Cluster-51324.45180	Cluster-51324.36687	Cluster-51324.44892				Cluster-51324.107567
Cluster-51324.64689		Cluster-51324.187511							Cluster-51324.44970			Cluster-51324.33918	Cluster-51324.84651	Cluster-51324.50290				Cluster-51324.102467
Cluster-51324.117803		Cluster-51324.63624							Cluster-51324.74554			Cluster-51324.53996	Cluster-51324.103952	Cluster-51324.85780				Cluster-51324.94872
Cluster-51324.148931		Cluster-51324.86336							Cluster-51324.87917			Cluster-51324.76080	Cluster-51324.93523	Cluster-51324.65737				Cluster-51324.103599
Cluster-51324.103275		Cluster-51324.114369							Cluster-51324.160313			Cluster-51324.121502	Cluster-51324.98900	Cluster-51324.157129				Cluster-51324.74504
Cluster-51324.19528		Cluster-51324.113656							Cluster-51324.37820			Cluster-51324.142284	Cluster-51324.97390	Cluster-51324.78458				Cluster-51324.89508
Cluster-51324.138901		Cluster-51324.116933							Cluster-51324.92476			Cluster-51324.146730	Cluster-51324.119255	Cluster-51324.100267				Cluster-51324.98368
Cluster-51324.77472		Cluster-51324.74035							Cluster-51324.65605				Cluster-51324.72862	Cluster-51324.108888				Cluster-51324.64714
Cluster-51324.95570		Cluster-51324.134743							Cluster-51324.103712				Cluster-51324.54376	Cluster-51324.89374				Cluster-51324.143688
Cluster-51324.109612		Cluster-51324.99481							Cluster-51324.100987				Cluster-51324.110134	Cluster-51324.70213				Cluster-51324.95454
Cluster-51324.89411		Cluster-51324.72814							Cluster-51324.99905				Cluster-51324.139419	Cluster-51324.99925				Cluster-51324.66134
Cluster-51324.98621		Cluster-51324.83418							Cluster-51324.134727				Cluster-51324.79227	Cluster-51324.104250				Cluster-51324.50640
Cluster-51324.111846		Cluster-51324.108055							Cluster-51324.133530				Cluster-51324.91054	Cluster-51324.124904				Cluster-51324.93867
Cluster-51324.154422		Cluster-51324.95069							Cluster-51324.100576				Cluster-51324.106573	Cluster-51324.157352				Cluster-51324.86065
Cluster-51324.45554		Cluster-51324.96373							Cluster-51324.87732				Cluster-51324.138051	Cluster-51324.97707				Cluster-51324.99121
Cluster-51324.99589		Cluster-51324.126415							Cluster-51324.37769				Cluster-51324.92726	Cluster-51324.87304				Cluster-51324.86598
Cluster-51324.99035		Cluster-51324.77990							Cluster-51324.101586				Cluster-51324.122629	Cluster-51324.89039				Cluster-51324.76849
Cluster-51324.76303		Cluster-51324.108037							Cluster-51324.113906				Cluster-51324.85915	Cluster-51324.122588				Cluster-51324.170154
Cluster-51324.108863		Cluster-51324.92672							Cluster-51324.73969				Cluster-51324.43440	Cluster-51324.159856				Cluster-51324.112030
Cluster-51324.115639		Cluster-51324.95214							Cluster-51324.88963				Cluster-51324.85849	Cluster-51324.87802				Cluster-51324.79644
Cluster-51324.82206		Cluster-51324.205014							Cluster-51324.182021				Cluster-51324.179711	Cluster-51324.53333				Cluster-51324.89274
Cluster-51324.119124		Cluster-51324.80360							Cluster-51324.34765				Cluster-51324.93601	Cluster-51324.102187				Cluster-51324.78090
Cluster-51324.103948		Cluster-51324.72482							Cluster-51324.142308				Cluster-51324.85519	Cluster-51324.84560				Cluster-51324.114552
Cluster-51324.75475		Cluster-51324.79090							Cluster-51324.106196				Cluster-51324.124297	Cluster-51324.107677				Cluster-51324.40532
Cluster-51324.139315		Cluster-51324.114670							Cluster-51324.106686				Cluster-51324.70932	Cluster-51324.131814				Cluster-51324.158460
Cluster-51324.167636		Cluster-51324.115575							Cluster-51324.52736				Cluster-51324.110547	Cluster-51324.81840				Cluster-51324.174368
Cluster-51324.91173		Cluster-51324.76659							Cluster-51324.169342				Cluster-51324.95755	Cluster-51324.113930				Cluster-51324.105124
Cluster-51324.141914		Cluster-51324.209014							Cluster-51324.68775				Cluster-51324.76302	Cluster-51324.119962				Cluster-51324.90342
Cluster-51324.107219		Cluster-51324.90424							Cluster-51324.44568				Cluster-51324.94681	Cluster-51324.118294				Cluster-51324.93361
Cluster-51324.78271		Cluster-51324.45073							Cluster-51324.137693				Cluster-51324.97659	Cluster-51324.82556				Cluster-51324.43119
Cluster-51324.103290		Cluster-51324.114421							Cluster-51324.143773				Cluster-51324.120648	Cluster-51324.81667				Cluster-51324.95204
Cluster-51324.54433		Cluster-51324.58931							Cluster-51324.127833				Cluster-51324.81128	Cluster-51324.137440				Cluster-51324.99970
Cluster-51324.116377		Cluster-51324.78148							Cluster-51324.96115				Cluster-51324.93245	Cluster-51324.56994				Cluster-51324.91695
Cluster-51324.93898		Cluster-51324.83205							Cluster-51324.147877				Cluster-51324.116193	Cluster-51324.136761				Cluster-51324.156117
Cluster-51324.80368		Cluster-51324.126696							Cluster-51324.58813				Cluster-51324.85200	Cluster-51324.106765				Cluster-51324.101932
Cluster-51324.62182		Cluster-51324.108371							Cluster-51324.134724				Cluster-51324.96185	Cluster-51324.87841				Cluster-51324.108766
Cluster-51324.92283		Cluster-51324.170744							Cluster-51324.77691				Cluster-51324.96104	Cluster-51324.110268				Cluster-51324.100439
Cluster-51324.54470		Cluster-51324.152189							Cluster-51324.148342				Cluster-51324.104026	Cluster-51324.85237				Cluster-51324.95999
Cluster-51324.194163		Cluster-51324.136897							Cluster-51324.99730				Cluster-51324.93358	Cluster-51324.160668				Cluster-51324.100040
Cluster-51324.60271		Cluster-51324.137648							Cluster-51324.145475				Cluster-51324.93997	Cluster-51324.110196				Cluster-51324.123903
Cluster-51324.109038		Cluster-51324.29529							Cluster-51324.124759				Cluster-51324.95857	Cluster-51324.112281				Cluster-51324.93775
Cluster-51324.94299		Cluster-51324.96803							Cluster-51324.45443				Cluster-51324.77531	Cluster-51324.64530				Cluster-51324.99435
Cluster-51324.141771		Cluster-51324.50478							Cluster-51324.161455				Cluster-51324.93685	Cluster-51324.150413				Cluster-51324.54289
Cluster-51324.124244		Cluster-51324.133579							Cluster-51324.72574				Cluster-51324.101843	Cluster-51324.85781				Cluster-51324.143814
Cluster-51324.71831		Cluster-51324.71773							Cluster-51324.108831				Cluster-51324.91067	Cluster-51324.80105				Cluster-51324.21593
Cluster-51324.167911		Cluster-51324.128566							Cluster-51324.126559				Cluster-51324.127989	Cluster-51324.125657				Cluster-51324.80248
Cluster-51324.82782		Cluster-51324.131767							Cluster-51324.174229				Cluster-51324.88564	Cluster-51324.171522				Cluster-51324.86662
Cluster-51324.94518		Cluster-51324.52899							Cluster-51324.43253				Cluster-51324.92361	Cluster-51324.99448				Cluster-51324.96576
Cluster-51324.30099		Cluster-51324.111708							Cluster-51324.96557				Cluster-51324.122086	Cluster-51324.99724				Cluster-51324.59103
Cluster-51324.108357		Cluster-51324.133325							Cluster-51324.82806				Cluster-51324.106539	Cluster-51324.128553				Cluster-51324.55525
Cluster-51324.92324		Cluster-51324.18016							Cluster-51324.94605				Cluster-51324.106190	Cluster-51324.104740				Cluster-51324.96080
Cluster-51324.161247		Cluster-51324.93347							Cluster-51324.91344				Cluster-51324.101910	Cluster-51324.147773				Cluster-51324.106363
Cluster-51324.112240		Cluster-51324.78481							Cluster-51324.139728				Cluster-51324.93526	Cluster-51324.82821				Cluster-51324.73199
Cluster-51324.77540		Cluster-51324.53391							Cluster-51324.64961				Cluster-51324.111574	Cluster-51324.109489				Cluster-51324.56395
Cluster-51324.113487		Cluster-51324.81418							Cluster-51324.80308				Cluster-51324.107259	Cluster-51324.60520				Cluster-51324.112661
Cluster-51324.88494		Cluster-51324.108796							Cluster-51324.156489				Cluster-51324.127426	Cluster-51324.32996				Cluster-51324.153522
Cluster-51324.34677		Cluster-51324.89728							Cluster-51324.46231				Cluster-51324.97009	Cluster-51324.120994				Cluster-51324.90156
Cluster-51324.131936		Cluster-51324.57027							Cluster-51324.69117				Cluster-51324.95081	Cluster-51324.83997				Cluster-51324.103119
Cluster-51324.79886		Cluster-51324.113787							Cluster-51324.71016				Cluster-51324.91366	Cluster-51324.91207				Cluster-51324.61987
Cluster-51324.105354		Cluster-51324.116851							Cluster-51324.87540				Cluster-51324.95252	Cluster-51324.74519				Cluster-51324.99082
Cluster-51324.79987		Cluster-51324.125343							Cluster-51324.102975				Cluster-51324.84931	Cluster-51324.114230				Cluster-51324.184632
Cluster-51324.115342		Cluster-51324.98229							Cluster-51324.54644				Cluster-51324.90362	Cluster-51324.125304				Cluster-51324.110649
Cluster-51324.92699		Cluster-51324.107479							Cluster-51324.84325				Cluster-51324.84533	Cluster-51324.169475				Cluster-51324.93357
Cluster-51324.50802		Cluster-51324.21424							Cluster-51324.45603				Cluster-51324.107083	Cluster-51324.50626				Cluster-51324.88691
Cluster-51324.96661		Cluster-51324.66840							Cluster-51324.92578				Cluster-51324.98052	Cluster-51324.139564				Cluster-51324.50056
Cluster-51324.39558		Cluster-51324.112450							Cluster-51324.138689				Cluster-51324.75406	Cluster-51324.104471				Cluster-51324.73310
Cluster-51324.59625		Cluster-51324.87629							Cluster-51324.59217				Cluster-51324.86992	Cluster-51324.52796				Cluster-51324.68611
Cluster-51324.143299		Cluster-51324.89375							Cluster-51324.58697				Cluster-51324.89680	Cluster-51324.82859				Cluster-51324.82534
Cluster-51324.59482		Cluster-51324.111887							Cluster-51324.136707				Cluster-51324.91798	Cluster-51324.86041				Cluster-51324.86684
Cluster-51324.98648		Cluster-51324.55989							Cluster-51324.79124				Cluster-51324.98880	Cluster-51324.138366				Cluster-51324.149738
Cluster-51324.67539		Cluster-51324.64461							Cluster-51324.119381				Cluster-51324.105522	Cluster-51324.114544				Cluster-51324.141116
Cluster-51324.76863		Cluster-51324.70872							Cluster-51324.177108				Cluster-51324.90457	Cluster-51324.87504				Cluster-51324.98616
Cluster-51324.93809		Cluster-51324.42562							Cluster-51324.93774				Cluster-51324.185161	Cluster-51324.137532				Cluster-51324.98611
Cluster-51324.62446		Cluster-51324.90190							Cluster-51324.112116				Cluster-51324.104415	Cluster-51324.39787				Cluster-51324.93369
Cluster-51324.70773		Cluster-51324.95786							Cluster-51324.131186				Cluster-51324.118592	Cluster-51324.97142				Cluster-51324.39870
Cluster-51324.61433		Cluster-51324.87054							Cluster-51324.87127				Cluster-51324.92804	Cluster-51324.125656				Cluster-51324.114383
Cluster-51324.97931		Cluster-51324.90825							Cluster-51324.68340				Cluster-51324.93876	Cluster-51324.64499				Cluster-51324.86017
Cluster-51324.98769		Cluster-51324.67875							Cluster-51324.126923				Cluster-51324.89518	Cluster-51324.134786				Cluster-51324.69709
Cluster-51324.111566		Cluster-51324.99180							Cluster-51324.49727				Cluster-51324.153554	Cluster-51324.95399				Cluster-51324.97245
Cluster-51324.73979		Cluster-51324.59395							Cluster-51324.153697				Cluster-51324.100892	Cluster-51324.97119				Cluster-51324.96360
Cluster-51324.43568		Cluster-51324.87048							Cluster-51324.154705				Cluster-51324.95936	Cluster-51324.34527				Cluster-51324.72496
Cluster-51324.62555		Cluster-51324.53244							Cluster-51324.45548				Cluster-51324.136739	Cluster-51324.88155				Cluster-51324.68697
Cluster-51324.140932		Cluster-51324.81379							Cluster-51324.44463				Cluster-51324.141580	Cluster-51324.97144				Cluster-51324.60028
Cluster-51324.88639		Cluster-51324.70174							Cluster-51324.135883				Cluster-51324.119127	Cluster-51324.86559				Cluster-51324.119640
Cluster-51324.95177		Cluster-51324.89310							Cluster-51324.134785				Cluster-51324.102997	Cluster-51324.46230				Cluster-51324.92785
Cluster-51324.84698		Cluster-51324.30214							Cluster-51324.74067				Cluster-51324.82832	Cluster-51324.93738				Cluster-51324.82296
Cluster-51324.93800		Cluster-51324.26348							Cluster-51324.99016				Cluster-51324.94295	Cluster-51324.99834				Cluster-51324.103483
Cluster-51324.85253		Cluster-51324.125659							Cluster-51324.129957				Cluster-51324.108127	Cluster-51324.56031				Cluster-51324.74821
Cluster-51324.121605		Cluster-51324.139789							Cluster-51324.188727				Cluster-51324.89936	Cluster-51324.94319				Cluster-51324.111325
Cluster-51324.138036		Cluster-51324.74710							Cluster-51324.38410				Cluster-51324.118724	Cluster-51324.60649				Cluster-51324.93384
Cluster-51324.100458		Cluster-51324.94010							Cluster-51324.135940				Cluster-51324.41065	Cluster-51324.113409				Cluster-51324.59745
Cluster-51324.63180		Cluster-51324.87763							Cluster-51324.63860				Cluster-51324.94048	Cluster-51324.163072				Cluster-51324.87731
Cluster-51324.133046		Cluster-51324.189587							Cluster-51324.115922				Cluster-51324.121379	Cluster-51324.107012				Cluster-51324.102168
Cluster-51324.95137		Cluster-51324.125436							Cluster-51324.111888				Cluster-51324.102775	Cluster-51324.52853				Cluster-51324.109162
Cluster-51324.142951		Cluster-51324.101584							Cluster-51324.138772				Cluster-51324.140979	Cluster-51324.96903				Cluster-51324.128985
Cluster-51324.95228		Cluster-51324.78907							Cluster-51324.156697				Cluster-51324.106921	Cluster-51324.62836				Cluster-51324.83085
Cluster-51324.102993		Cluster-51324.100793							Cluster-51324.37011				Cluster-51324.136997	Cluster-51324.84292				Cluster-51324.140399
Cluster-51324.97627		Cluster-51324.80026							Cluster-51324.124409				Cluster-51324.87898	Cluster-51324.64901				Cluster-51324.130086
Cluster-51324.101314		Cluster-51324.92338							Cluster-51324.95106				Cluster-51324.106609	Cluster-51324.64307				Cluster-51324.115596
Cluster-51324.46980		Cluster-51324.105873							Cluster-51324.95833				Cluster-51324.93847	Cluster-51324.113179				Cluster-51324.131157
Cluster-51324.98544		Cluster-51324.122327							Cluster-51324.109918				Cluster-51324.94139	Cluster-51324.94938				Cluster-51324.74552
Cluster-51324.95224		Cluster-51324.176475							Cluster-51324.72312				Cluster-51324.85434	Cluster-51324.156646				Cluster-51324.137669
Cluster-51324.55756		Cluster-51324.92262							Cluster-51324.97969				Cluster-51324.87749	Cluster-51324.94638				Cluster-51324.69742
Cluster-51324.136774		Cluster-51324.120479							Cluster-51324.38980				Cluster-51324.96951	Cluster-51324.121346				Cluster-51324.42954
Cluster-51324.102488		Cluster-51324.118603							Cluster-51324.68032				Cluster-51324.118712	Cluster-51324.185892				Cluster-51324.99904
Cluster-51324.69800		Cluster-51324.80916							Cluster-51324.65177				Cluster-51324.94166	Cluster-51324.97037				Cluster-51324.107980
Cluster-51324.135774		Cluster-51324.107008							Cluster-51324.39490				Cluster-51324.60570	Cluster-51324.100464				Cluster-51324.80762
Cluster-51324.87233		Cluster-51324.120791							Cluster-51324.150203				Cluster-51324.93771	Cluster-51324.94861				Cluster-51324.97303
Cluster-51324.95206		Cluster-51324.78506							Cluster-51324.80839				Cluster-51324.77701	Cluster-51324.98108				Cluster-51324.113448
Cluster-51324.92126		Cluster-51324.87810							Cluster-51324.50801				Cluster-51324.110621	Cluster-51324.207901				Cluster-51324.91679
Cluster-51324.74982		Cluster-51324.118357							Cluster-51324.94954				Cluster-51324.121179	Cluster-51324.105593				Cluster-51324.115573
Cluster-51324.160782		Cluster-51324.74257							Cluster-51324.87621				Cluster-51324.72667	Cluster-51324.99624				Cluster-51324.53472
Cluster-51324.148929		Cluster-51324.35777							Cluster-51324.87292				Cluster-51324.123869	Cluster-51324.144716				Cluster-51324.85251
Cluster-51324.101157		Cluster-51324.24651							Cluster-51324.113209				Cluster-51324.135641	Cluster-51324.97796				Cluster-51324.98706
Cluster-51324.100894		Cluster-51324.93709							Cluster-51324.95841				Cluster-51324.91601	Cluster-51324.99125				Cluster-51324.152854
Cluster-51324.153402		Cluster-51324.154641							Cluster-51324.89087				Cluster-51324.124664	Cluster-51324.103357				Cluster-51324.65754
Cluster-51324.76105		Cluster-51324.94726							Cluster-51324.189655				Cluster-51324.82944	Cluster-51324.71144				Cluster-51324.76287
Cluster-51324.85149		Cluster-51324.131335							Cluster-51324.81687				Cluster-51324.88473	Cluster-51324.90603				Cluster-51324.100577
Cluster-51324.157681		Cluster-51324.92123							Cluster-51324.115882				Cluster-51324.138736	Cluster-51324.97699				Cluster-51324.88124
Cluster-51324.101805		Cluster-51324.119100							Cluster-51324.146341				Cluster-51324.51377	Cluster-51324.93584				Cluster-51324.157891
Cluster-51324.99090		Cluster-51324.112562							Cluster-51324.116730				Cluster-51324.93249	Cluster-51324.58911				Cluster-51324.126700
Cluster-51324.78386		Cluster-51324.119103							Cluster-51324.102379				Cluster-51324.107476	Cluster-51324.58805				Cluster-51324.94055
Cluster-51324.68716		Cluster-51324.89775							Cluster-51324.119897				Cluster-51324.72457	Cluster-51324.76396				Cluster-51324.93836
Cluster-51324.102221		Cluster-51324.110669							Cluster-51324.48496				Cluster-51324.112087	Cluster-51324.114604				Cluster-51324.90619
Cluster-51324.146152		Cluster-51324.78278							Cluster-51324.88330				Cluster-51324.93303	Cluster-51324.147932				Cluster-51324.93329
Cluster-51324.49451		Cluster-51324.84189							Cluster-51324.12932				Cluster-51324.86147	Cluster-51324.146234				Cluster-51324.63067
Cluster-51324.104783		Cluster-51324.145186							Cluster-51324.95126				Cluster-51324.105133	Cluster-51324.57869				Cluster-51324.50894
Cluster-51324.108062		Cluster-51324.111084							Cluster-51324.85511				Cluster-51324.91441	Cluster-51324.111414				Cluster-51324.111110
Cluster-51324.142525		Cluster-51324.122097							Cluster-51324.155536				Cluster-51324.99574	Cluster-51324.149651				Cluster-51324.104440
Cluster-51324.199263		Cluster-51324.106992							Cluster-51324.63381				Cluster-51324.95725	Cluster-51324.129395				Cluster-51324.148211
Cluster-51324.88975		Cluster-51324.93453							Cluster-51324.64690				Cluster-51324.102037	Cluster-51324.39206				Cluster-51324.136706
Cluster-51324.168306		Cluster-51324.80421							Cluster-51324.127819				Cluster-51324.92781	Cluster-51324.91962				Cluster-51324.162948
Cluster-51324.29370		Cluster-51324.79196							Cluster-51324.146627				Cluster-51324.101063	Cluster-51324.83342				Cluster-51324.75995
Cluster-51324.99629		Cluster-51324.94796							Cluster-51324.90088				Cluster-51324.72052	Cluster-51324.109802				Cluster-51324.119758
Cluster-51324.98911		Cluster-51324.41310							Cluster-51324.78539				Cluster-51324.115296	Cluster-51324.26816				Cluster-51324.128186
Cluster-51324.100584		Cluster-51324.177904							Cluster-51324.100129				Cluster-51324.99841	Cluster-51324.94827				Cluster-51324.78517
Cluster-51324.150263		Cluster-51324.5551							Cluster-51324.15280				Cluster-51324.97802	Cluster-51324.78608				Cluster-51324.95129
Cluster-51324.143520		Cluster-51324.54098							Cluster-51324.91934				Cluster-51324.89359	Cluster-51324.49599				Cluster-51324.39606
Cluster-51324.111816		Cluster-51324.99797							Cluster-51324.53564				Cluster-51324.91442	Cluster-51324.111383				Cluster-51324.121007
Cluster-51324.99381		Cluster-51324.127772							Cluster-51324.104087				Cluster-51324.76770	Cluster-51324.71271				Cluster-51324.191568
Cluster-51324.101630		Cluster-51324.141960							Cluster-51324.72985				Cluster-51324.101131	Cluster-51324.56912				Cluster-51324.73985
Cluster-51324.105990		Cluster-51324.77479							Cluster-51324.144191				Cluster-51324.96247	Cluster-51324.103141				Cluster-51324.45152
Cluster-51324.70319		Cluster-51324.125707							Cluster-51324.130469				Cluster-51324.94041	Cluster-51324.104096				Cluster-51324.79749
Cluster-51324.71535		Cluster-51324.107750							Cluster-51324.87848				Cluster-51324.86991	Cluster-51324.86192				Cluster-51324.126661
Cluster-51324.102578		Cluster-51324.69329							Cluster-51324.154559				Cluster-51324.90699	Cluster-51324.51341				Cluster-51324.113563
Cluster-51324.90852		Cluster-51324.88615							Cluster-51324.128163				Cluster-51324.66935	Cluster-51324.106274				Cluster-51324.141920
Cluster-51324.88366		Cluster-51324.53401							Cluster-51324.108710				Cluster-51324.108605	Cluster-51324.124271				Cluster-51324.85492
Cluster-51324.92586		Cluster-51324.89051							Cluster-51324.125129				Cluster-51324.93758	Cluster-51324.65662				Cluster-51324.115964
Cluster-51324.94241		Cluster-51324.96839							Cluster-51324.33953				Cluster-51324.91686	Cluster-51324.119890				Cluster-51324.79169
Cluster-51324.116622		Cluster-51324.94223							Cluster-51324.112832				Cluster-51324.98996	Cluster-51324.57406				Cluster-51324.121273
Cluster-51324.93116		Cluster-51324.135615							Cluster-51324.80077				Cluster-51324.94730	Cluster-51324.73347				Cluster-51324.135462
Cluster-51324.97950		Cluster-51324.69677							Cluster-51324.89555				Cluster-51324.94032	Cluster-51324.69581				Cluster-51324.68906
Cluster-51324.88767		Cluster-51324.38417							Cluster-51324.81590				Cluster-51324.97051	Cluster-51324.83325				Cluster-51324.123117
Cluster-51324.115869		Cluster-51324.8695							Cluster-51324.137090				Cluster-51324.96059	Cluster-51324.125222				Cluster-51324.92454
Cluster-51324.133438		Cluster-51324.107094							Cluster-51324.78656				Cluster-51324.75609	Cluster-51324.82890				Cluster-51324.81837
Cluster-51324.163894		Cluster-51324.98726							Cluster-51324.120442				Cluster-51324.80583	Cluster-51324.111757				Cluster-51324.166037
Cluster-51324.44973		Cluster-51324.113217							Cluster-51324.137893				Cluster-51324.99102	Cluster-51324.82250				Cluster-51324.88420
Cluster-51324.78580		Cluster-51324.141997							Cluster-51324.144236				Cluster-51324.95043	Cluster-51324.63928				Cluster-51324.22443
Cluster-51324.107685		Cluster-51324.51792							Cluster-51324.109281				Cluster-51324.83020	Cluster-51324.69915				Cluster-51324.116608
Cluster-51324.75082		Cluster-51324.66332							Cluster-51324.76880				Cluster-51324.74171	Cluster-51324.123911				Cluster-51324.47383
Cluster-51324.169208		Cluster-51324.92616							Cluster-51324.89272				Cluster-51324.100405	Cluster-51324.124980				Cluster-51324.95345
Cluster-51324.50541		Cluster-51324.130969							Cluster-51324.56236				Cluster-51324.84658	Cluster-51324.94770				Cluster-51324.45709
Cluster-51324.108843		Cluster-51324.197822							Cluster-51324.129751				Cluster-51324.99293	Cluster-51324.81579				Cluster-51324.111083
Cluster-51324.89300		Cluster-51324.97726							Cluster-51324.159906				Cluster-51324.84526	Cluster-51324.101266				Cluster-51324.150207
Cluster-51324.143478		Cluster-51324.85791							Cluster-51324.65450				Cluster-51324.74488	Cluster-51324.106323				Cluster-51324.56291
Cluster-51324.146751		Cluster-51324.50000							Cluster-51324.126902				Cluster-51324.94607	Cluster-51324.95498				Cluster-51324.19614
Cluster-51324.85260		Cluster-51324.105918							Cluster-51324.68299				Cluster-51324.97170	Cluster-51324.68297				Cluster-51324.94335
Cluster-51324.93977		Cluster-51324.107894							Cluster-51324.89598				Cluster-51324.72060	Cluster-51324.79177				Cluster-51324.121673
Cluster-51324.38202		Cluster-51324.111393							Cluster-51324.123066				Cluster-51324.93045	Cluster-51324.72958				Cluster-51324.86306
Cluster-51324.110074		Cluster-51324.112886							Cluster-51324.54106				Cluster-51324.91014	Cluster-51324.163079				Cluster-51324.66938
Cluster-51324.127711		Cluster-51324.97765							Cluster-51324.23912				Cluster-51324.111473	Cluster-51324.153905				Cluster-51324.97647
Cluster-51324.55824		Cluster-51324.77496							Cluster-51324.91509				Cluster-51324.94391	Cluster-51324.32389				Cluster-51324.80171
Cluster-51324.141451		Cluster-51324.128360							Cluster-51324.142859				Cluster-51324.139524	Cluster-51324.97486				Cluster-51324.93729
Cluster-51324.51895		Cluster-51324.114595							Cluster-51324.94856				Cluster-51324.82802	Cluster-51324.140706				Cluster-51324.73888
Cluster-51324.49222		Cluster-51324.58831							Cluster-51324.78787				Cluster-51324.107870	Cluster-51324.127312				Cluster-51324.112938
Cluster-51324.57329		Cluster-51324.89674							Cluster-51324.89161				Cluster-51324.96034	Cluster-51324.62794				Cluster-51324.99311
Cluster-51324.499		Cluster-51324.92373							Cluster-51324.141803				Cluster-51324.96343	Cluster-51324.119956				Cluster-51324.146145
Cluster-51324.91682		Cluster-51324.116472							Cluster-51324.79080				Cluster-51324.96493	Cluster-51324.98441				Cluster-51324.92810
Cluster-51324.106283		Cluster-51324.96496							Cluster-51324.191773				Cluster-51324.51372	Cluster-51324.95542				Cluster-51324.144296
Cluster-51324.93612		Cluster-51324.59852							Cluster-51324.63886				Cluster-51324.66339	Cluster-51324.56299				Cluster-51324.65955
Cluster-51324.132773		Cluster-51324.105920							Cluster-51324.105157				Cluster-51324.95462	Cluster-51324.67162				Cluster-51324.55219
Cluster-51324.106990		Cluster-51324.101876							Cluster-51324.94383				Cluster-51324.96583	Cluster-51324.58189				Cluster-51324.54814
Cluster-51324.62747		Cluster-51324.79469							Cluster-51324.120261				Cluster-51324.95782	Cluster-51324.73140				Cluster-51324.106156
Cluster-51324.121356		Cluster-51324.92630							Cluster-51324.25042				Cluster-51324.104082	Cluster-51324.107103				Cluster-51324.63739
Cluster-51324.93696		Cluster-51324.108354							Cluster-51324.133015				Cluster-51324.81335	Cluster-51324.91840				Cluster-51324.173022
Cluster-51324.153968		Cluster-51324.199501							Cluster-51324.65453				Cluster-51324.100410	Cluster-51324.108924				Cluster-51324.60569
Cluster-51324.96649		Cluster-51324.102579							Cluster-51324.146037				Cluster-51324.77455	Cluster-51324.91967				Cluster-51324.87019
Cluster-51324.151804		Cluster-51324.79869							Cluster-51324.110668				Cluster-51324.91295	Cluster-51324.86329				Cluster-51324.94538
Cluster-51324.132058		Cluster-51324.99393							Cluster-51324.104475				Cluster-51324.143620	Cluster-51324.118541				Cluster-51324.118734
Cluster-51324.92109		Cluster-51324.86371							Cluster-51324.182706				Cluster-51324.95471	Cluster-51324.141511				Cluster-51324.89234
Cluster-51324.109375		Cluster-51324.101434							Cluster-51324.38473				Cluster-51324.108641	Cluster-51324.123650				Cluster-51324.65498
Cluster-51324.84062		Cluster-51324.105798							Cluster-51324.58041				Cluster-51324.116295	Cluster-51324.151419				Cluster-51324.92398
Cluster-51324.45512		Cluster-51324.114875							Cluster-51324.47178				Cluster-51324.91317	Cluster-51324.52433				Cluster-51324.47259
Cluster-51324.147187		Cluster-51324.106079							Cluster-51324.99250				Cluster-51324.106681	Cluster-51324.92174				Cluster-51324.94766
Cluster-51324.128901		Cluster-51324.97240							Cluster-51324.70770				Cluster-51324.80297	Cluster-51324.67082				Cluster-51324.93183
Cluster-51324.96847		Cluster-51324.128301							Cluster-51324.144067				Cluster-51324.103110	Cluster-51324.99462				Cluster-51324.100208
Cluster-51324.93909		Cluster-51324.125215							Cluster-51324.70827				Cluster-51324.94185	Cluster-51324.84974				Cluster-51324.46437
Cluster-51324.125455		Cluster-51324.132556							Cluster-51324.79991				Cluster-51324.91749	Cluster-51324.75237				Cluster-51324.88079
Cluster-51324.96082		Cluster-51324.38509							Cluster-51324.188326				Cluster-51324.135742	Cluster-51324.125841				Cluster-51324.109686
Cluster-51324.78092		Cluster-51324.131108							Cluster-51324.118422				Cluster-51324.97999	Cluster-51324.46724				Cluster-51324.94831
Cluster-51324.94153		Cluster-51324.98576							Cluster-51324.50445				Cluster-51324.48514	Cluster-51324.153690				Cluster-51324.134863
Cluster-51324.155767		Cluster-51324.70047							Cluster-51324.150668				Cluster-51324.63734	Cluster-51324.85125				Cluster-51324.105749
Cluster-51324.109955		Cluster-51324.126001							Cluster-51324.39559				Cluster-51324.101767	Cluster-51324.103668				Cluster-51324.66805
Cluster-51324.95286		Cluster-51324.107640							Cluster-51324.155503				Cluster-51324.118231	Cluster-51324.80904				Cluster-51324.94836
Cluster-51324.87338		Cluster-51324.89513							Cluster-51324.182715				Cluster-51324.91589	Cluster-51324.129848				Cluster-51324.102447
Cluster-51324.47653		Cluster-51324.106889							Cluster-51324.92008				Cluster-51324.111734	Cluster-51324.65797				Cluster-51324.78259
Cluster-51324.104355		Cluster-51324.101558							Cluster-51324.56913				Cluster-51324.72750	Cluster-51324.139420				Cluster-51324.160117
Cluster-51324.90850		Cluster-51324.32420							Cluster-51324.67271				Cluster-51324.89664	Cluster-51324.91888				Cluster-51324.116742
Cluster-51324.108721		Cluster-51324.97696							Cluster-51324.138780				Cluster-51324.84740	Cluster-51324.106483				Cluster-51324.91099
Cluster-51324.105774		Cluster-51324.74106							Cluster-51324.140806				Cluster-51324.95437	Cluster-51324.106335				Cluster-51324.86216
Cluster-51324.74212		Cluster-51324.51817							Cluster-51324.96269				Cluster-51324.93708	Cluster-51324.79890				Cluster-51324.137293
Cluster-51324.93906		Cluster-51324.106122							Cluster-51324.87057				Cluster-51324.95050	Cluster-51324.45147				Cluster-51324.169975
Cluster-51324.137362		Cluster-51324.115533							Cluster-51324.35344				Cluster-51324.95968	Cluster-51324.86972				Cluster-51324.112385
Cluster-51324.87583		Cluster-51324.83079							Cluster-51324.41367				Cluster-51324.96584	Cluster-51324.53504				Cluster-51324.95810
Cluster-51324.129136		Cluster-51324.108282							Cluster-51324.83788				Cluster-51324.93114	Cluster-51324.80050				Cluster-51324.101032
Cluster-51324.143097		Cluster-51324.114950							Cluster-51324.136573				Cluster-51324.88244	Cluster-51324.84879				Cluster-51324.94358
Cluster-51324.90895		Cluster-51324.190945							Cluster-51324.147373				Cluster-51324.98548	Cluster-51324.76518				Cluster-51324.83755
Cluster-51324.2106		Cluster-51324.122279							Cluster-51324.137690				Cluster-51324.93865	Cluster-51324.112608				Cluster-51324.97519
Cluster-51324.98371		Cluster-51324.88456							Cluster-51324.110426				Cluster-51324.197955	Cluster-51324.87913				Cluster-51324.160156
Cluster-51324.46699		Cluster-51324.49500							Cluster-51324.102964				Cluster-51324.89902	Cluster-51324.69673				Cluster-51324.151031
Cluster-51324.133128		Cluster-51324.85071							Cluster-51324.57983				Cluster-51324.170873	Cluster-51324.40843				Cluster-51324.72728
Cluster-51324.90116		Cluster-51324.84258							Cluster-51324.79835				Cluster-51324.99010	Cluster-51324.90749				Cluster-51324.111745
Cluster-51324.69910		Cluster-51324.66928							Cluster-51324.134048				Cluster-51324.85910	Cluster-51324.90593				Cluster-51324.163041
Cluster-51324.66256		Cluster-51324.117537							Cluster-51324.120835				Cluster-51324.95756	Cluster-51324.71823				Cluster-51324.142783
Cluster-51324.105469		Cluster-51324.110797							Cluster-51324.53794				Cluster-51324.76501	Cluster-51324.104814				Cluster-51324.100707
Cluster-51324.40673		Cluster-51324.124185							Cluster-51324.84724				Cluster-51324.111035	Cluster-51324.68301				Cluster-51324.78516
Cluster-51324.116444		Cluster-51324.127974							Cluster-51324.88882				Cluster-51324.57107	Cluster-51324.136352				Cluster-51324.119094
Cluster-51324.94801		Cluster-51324.121797							Cluster-51324.126952				Cluster-51324.148002	Cluster-51324.80996				Cluster-51324.113543
Cluster-51324.91411		Cluster-51324.147399							Cluster-51324.51285				Cluster-51324.88231	Cluster-51324.100703				Cluster-51324.99238
Cluster-51324.74833		Cluster-51324.71229							Cluster-51324.57836				Cluster-51324.145414	Cluster-51324.103713				Cluster-51324.31730
Cluster-51324.65081		Cluster-51324.118980							Cluster-51324.134633				Cluster-51324.95039	Cluster-51324.90780				Cluster-51324.91855
Cluster-51324.157146		Cluster-51324.60169							Cluster-51324.174692				Cluster-51324.87037	Cluster-51324.99570				Cluster-51324.91217
Cluster-51324.67150		Cluster-51324.96365							Cluster-51324.75750				Cluster-51324.88539	Cluster-51324.105641				Cluster-51324.81492
Cluster-51324.111332		Cluster-51324.51956							Cluster-51324.90056				Cluster-51324.107667	Cluster-51324.64232				Cluster-51324.151278
Cluster-51324.56954		Cluster-51324.103709							Cluster-51324.144380				Cluster-51324.94172	Cluster-51324.113794				Cluster-51324.121526
Cluster-51324.94797		Cluster-51324.114215							Cluster-51324.65456				Cluster-51324.114742	Cluster-51324.87707				Cluster-51324.73817
Cluster-51324.86703		Cluster-51324.97352							Cluster-51324.117467				Cluster-51324.96920	Cluster-51324.109211				Cluster-51324.108968
Cluster-51324.84031		Cluster-51324.73581							Cluster-51324.148925				Cluster-51324.96705	Cluster-51324.71884				Cluster-51324.98592
Cluster-51324.50227		Cluster-51324.127223							Cluster-51324.48364				Cluster-51324.84648	Cluster-51324.77005				Cluster-51324.90266
Cluster-51324.92825		Cluster-51324.117808							Cluster-51324.130797				Cluster-51324.88468	Cluster-51324.72477				Cluster-51324.53640
Cluster-51324.120266		Cluster-51324.115214							Cluster-51324.106946				Cluster-51324.94083	Cluster-51324.99471				Cluster-51324.94366
Cluster-51324.112304		Cluster-51324.101473							Cluster-51324.101538				Cluster-51324.94180	Cluster-51324.75315				Cluster-51324.94568
Cluster-51324.146603		Cluster-51324.104903							Cluster-51324.97367				Cluster-51324.114767	Cluster-51324.84980				Cluster-51324.101631
Cluster-51324.96255		Cluster-51324.125321							Cluster-51324.148532				Cluster-51324.88743	Cluster-51324.118058				Cluster-51324.86156
Cluster-51324.125805		Cluster-51324.85014							Cluster-51324.101441				Cluster-51324.72611	Cluster-51324.164869				Cluster-51324.185040
Cluster-51324.79567		Cluster-51324.140782							Cluster-51324.52546				Cluster-51324.93258	Cluster-51324.108932				Cluster-51324.114773
Cluster-51324.50139		Cluster-51324.82136							Cluster-51324.68917				Cluster-51324.18715	Cluster-51324.81327				Cluster-51324.52960
Cluster-51324.108026		Cluster-51324.147459							Cluster-51324.6473				Cluster-51324.100004	Cluster-51324.86341				Cluster-51324.119495
Cluster-51324.57962		Cluster-51324.89398							Cluster-51324.101007				Cluster-51324.145612	Cluster-51324.30128				Cluster-51324.93331
Cluster-51324.87254		Cluster-51324.123034							Cluster-51324.75646				Cluster-51324.93835	Cluster-51324.137915				Cluster-51324.82781
Cluster-51324.139152		Cluster-51324.137557							Cluster-51324.80482				Cluster-51324.88504	Cluster-51324.56857				Cluster-51324.64198
Cluster-51324.158432		Cluster-51324.75482							Cluster-51324.40910				Cluster-51324.128979	Cluster-51324.92289				Cluster-51324.133864
Cluster-51324.84074		Cluster-51324.101064							Cluster-51324.62517				Cluster-51324.98731	Cluster-51324.84087				Cluster-51324.116634
Cluster-51324.136422		Cluster-51324.103040							Cluster-51324.92258				Cluster-51324.92154	Cluster-51324.130462				Cluster-51324.116941
Cluster-51324.93498		Cluster-51324.101624							Cluster-51324.44269				Cluster-51324.95365	Cluster-51324.96239				Cluster-51324.124717
Cluster-51324.103145		Cluster-51324.90763							Cluster-51324.83285				Cluster-51324.151271	Cluster-51324.123416				Cluster-51324.74090
Cluster-51324.91583		Cluster-51324.85257							Cluster-51324.83673				Cluster-51324.104331	Cluster-51324.123167				Cluster-51324.166614
Cluster-51324.143429		Cluster-51324.91444							Cluster-51324.87059				Cluster-51324.95119	Cluster-51324.62303				Cluster-51324.67361
Cluster-51324.95502		Cluster-51324.86372							Cluster-51324.189005				Cluster-51324.59292	Cluster-51324.131052				Cluster-51324.132369
Cluster-51324.42672		Cluster-51324.104345							Cluster-51324.127945				Cluster-51324.89170	Cluster-51324.84809				Cluster-51324.101122
Cluster-51324.111318		Cluster-51324.61134							Cluster-51324.184502				Cluster-51324.99424	Cluster-51324.74431				Cluster-51324.96142
Cluster-51324.110022		Cluster-51324.109714							Cluster-51324.105562				Cluster-51324.132157	Cluster-51324.114529				Cluster-51324.121895
Cluster-51324.178370		Cluster-51324.37874							Cluster-51324.144190				Cluster-51324.101542	Cluster-51324.81568				Cluster-51324.88137
Cluster-51324.90786		Cluster-51324.86045							Cluster-51324.90459				Cluster-51324.147249	Cluster-51324.34807				Cluster-51324.45470
Cluster-51324.185170		Cluster-51324.72571							Cluster-51324.143420				Cluster-51324.93042	Cluster-51324.114173				Cluster-51324.76615
Cluster-51324.51183		Cluster-51324.116001							Cluster-51324.27313				Cluster-51324.92122	Cluster-51324.92408				Cluster-51324.74176
Cluster-51324.120829		Cluster-51324.107142							Cluster-51324.139665				Cluster-51324.65591	Cluster-51324.141242				Cluster-51324.104532
Cluster-51324.87461		Cluster-51324.49227							Cluster-51324.85881				Cluster-51324.90159	Cluster-51324.145620				Cluster-51324.143117
Cluster-51324.153070		Cluster-51324.121146							Cluster-51324.85687				Cluster-51324.94393	Cluster-51324.75612				Cluster-51324.72333
Cluster-51324.174224		Cluster-51324.111996							Cluster-51324.41396				Cluster-51324.104171	Cluster-51324.127208				Cluster-51324.87067
Cluster-51324.93412		Cluster-51324.74128							Cluster-51324.93403				Cluster-51324.93180	Cluster-51324.106608				Cluster-51324.135057
Cluster-51324.87087		Cluster-51324.143356							Cluster-51324.148564				Cluster-51324.94417	Cluster-67855.0				Cluster-51324.93637
Cluster-51324.150264		Cluster-51324.89349							Cluster-51324.87190				Cluster-51324.95390	Cluster-51324.83228				Cluster-51324.89307
Cluster-51324.61022		Cluster-51324.99541							Cluster-51324.92577				Cluster-51324.70778	Cluster-51324.116510				Cluster-51324.93701
Cluster-51324.82316		Cluster-51324.120369							Cluster-51324.84154				Cluster-51324.98067	Cluster-51324.44176				Cluster-51324.76797
Cluster-51324.120713		Cluster-51324.95600							Cluster-51324.60574				Cluster-51324.95739	Cluster-51324.84459				Cluster-51324.116616
Cluster-51324.103563		Cluster-51324.63472							Cluster-51324.69248				Cluster-51324.81263	Cluster-51324.81184				Cluster-51324.66690
Cluster-51324.93515		Cluster-51324.91986							Cluster-51324.167276				Cluster-51324.90059	Cluster-51324.51568				Cluster-51324.44437
Cluster-51324.11605		Cluster-51324.114378							Cluster-51324.44323				Cluster-51324.84670	Cluster-51324.108413				Cluster-51324.71324
Cluster-51324.43617		Cluster-51324.119486							Cluster-51324.63087				Cluster-51324.88323	Cluster-51324.128484				Cluster-51324.57306
Cluster-51324.88993		Cluster-51324.109292							Cluster-51324.68099				Cluster-51324.84305	Cluster-51324.39768				Cluster-51324.114023
Cluster-51324.113034		Cluster-51324.95921							Cluster-51324.157243				Cluster-51324.129537	Cluster-51324.62565				Cluster-51324.74919
Cluster-51324.108300		Cluster-51324.51320							Cluster-51324.153342				Cluster-51324.90904	Cluster-51324.67436				Cluster-51324.81908
Cluster-51324.106059		Cluster-51324.120309							Cluster-51324.116868				Cluster-51324.114362	Cluster-51324.84590				Cluster-51324.79112
Cluster-51324.99452		Cluster-51324.47990							Cluster-51324.76735				Cluster-51324.75349	Cluster-51324.110697				Cluster-51324.62240
Cluster-51324.94320		Cluster-51324.94116							Cluster-51324.51369				Cluster-51324.92288	Cluster-51324.129761				Cluster-51324.83882
Cluster-51324.64063		Cluster-51324.114548							Cluster-51324.94367				Cluster-51324.107612	Cluster-51324.109940				Cluster-51324.66257
Cluster-51324.47966		Cluster-51324.108131							Cluster-51324.123118				Cluster-51324.148506	Cluster-51324.66328				Cluster-51324.120700
Cluster-51324.101827		Cluster-51324.123050							Cluster-51324.154831				Cluster-51324.82330	Cluster-51324.125653				Cluster-51324.103077
Cluster-51324.93360		Cluster-51324.93650							Cluster-51324.89935				Cluster-51324.87833	Cluster-51324.111385				Cluster-51324.124702
Cluster-51324.96305		Cluster-51324.93113							Cluster-51324.83529				Cluster-51324.127143	Cluster-51324.149061				Cluster-51324.138381
Cluster-51324.86332		Cluster-51324.86388							Cluster-51324.63447				Cluster-51324.94691	Cluster-51324.63553				Cluster-51324.94284
Cluster-51324.27862		Cluster-51324.119887							Cluster-51324.108519				Cluster-51324.145843	Cluster-51324.83143				Cluster-51324.184084
Cluster-51324.81413		Cluster-51324.78337							Cluster-51324.59181				Cluster-51324.105833	Cluster-51324.30193				Cluster-51324.95574
Cluster-51324.120291		Cluster-51324.106747							Cluster-51324.46679				Cluster-51324.94414	Cluster-51324.58910				Cluster-51324.79984
Cluster-51324.70610		Cluster-51324.98225							Cluster-51324.109248				Cluster-51324.74426	Cluster-51324.129190				Cluster-51324.92921
Cluster-51324.49448		Cluster-51324.97569							Cluster-51324.60755				Cluster-51324.77974	Cluster-51324.173878				Cluster-51324.88886
Cluster-51324.88408		Cluster-51324.129690							Cluster-51324.85491				Cluster-51324.95878	Cluster-51324.111224				Cluster-51324.66275
Cluster-51324.92166		Cluster-51324.94641							Cluster-51324.75956				Cluster-51324.136850	Cluster-51324.111408				Cluster-51324.120275
Cluster-51324.118487		Cluster-51324.126521							Cluster-51324.148152				Cluster-51324.121607	Cluster-51324.95042				Cluster-51324.87928
Cluster-51324.203089		Cluster-51324.81881							Cluster-51324.66346				Cluster-51324.95979	Cluster-51324.95760				Cluster-51324.87251
Cluster-51324.94515		Cluster-51324.107363							Cluster-51324.99778				Cluster-51324.101664	Cluster-51324.81197				Cluster-51324.190365
Cluster-51324.88912		Cluster-51324.109184							Cluster-51324.131025				Cluster-51324.78929	Cluster-51324.43034				Cluster-51324.89024
Cluster-51324.82776		Cluster-51324.83265							Cluster-51324.113544				Cluster-51324.100919	Cluster-51324.93026				Cluster-51324.45153
Cluster-51324.91609		Cluster-51324.91702							Cluster-51324.124573				Cluster-51324.87344	Cluster-51324.128066				Cluster-51324.91275
Cluster-51324.113629		Cluster-51324.97104							Cluster-51324.132359				Cluster-51324.70885	Cluster-51324.119426				Cluster-51324.81838
Cluster-51324.137892		Cluster-51324.91922							Cluster-51324.97687				Cluster-51324.49058	Cluster-51324.113946				Cluster-51324.55798
Cluster-51324.145861		Cluster-51324.125554							Cluster-51324.50201				Cluster-51324.89824	Cluster-51324.125811				Cluster-51324.119585
Cluster-51324.95104		Cluster-51324.89088							Cluster-51324.148226				Cluster-51324.93983	Cluster-51324.149059				Cluster-51324.132851
Cluster-51324.64498		Cluster-51324.103230							Cluster-51324.136716				Cluster-51324.92758	Cluster-51324.145892				Cluster-51324.162690
Cluster-51324.173460		Cluster-51324.87250							Cluster-51324.44893				Cluster-51324.103697	Cluster-51324.115767				Cluster-51324.78305
Cluster-51324.104758		Cluster-51324.90057							Cluster-51324.53745				Cluster-51324.85461	Cluster-51324.135128				Cluster-51324.54510
Cluster-51324.77294		Cluster-51324.71730							Cluster-51324.74255				Cluster-51324.80125	Cluster-51324.97203				Cluster-51324.80071
Cluster-51324.136304		Cluster-51324.104013							Cluster-51324.76725				Cluster-51324.97214	Cluster-51324.103922				Cluster-51324.133970
Cluster-51324.47766		Cluster-51324.33826							Cluster-51324.90079				Cluster-51324.125960	Cluster-51324.97386				Cluster-51324.88869
Cluster-51324.65465		Cluster-51324.19515							Cluster-51324.91635				Cluster-51324.101155	Cluster-51324.149129				Cluster-51324.111826
Cluster-51324.87972		Cluster-51324.66883							Cluster-51324.88854				Cluster-51324.144033	Cluster-51324.104322				Cluster-51324.86542
Cluster-51324.50140		Cluster-51324.77183							Cluster-51324.61031				Cluster-51324.98192	Cluster-51324.90021				Cluster-51324.69058
Cluster-51324.101613		Cluster-51324.74475							Cluster-51324.129959				Cluster-51324.79395	Cluster-51324.52424				Cluster-51324.132150
Cluster-51324.102333		Cluster-51324.65232							Cluster-51324.163554				Cluster-51324.90344	Cluster-51324.100449				Cluster-51324.92603
Cluster-51324.132086		Cluster-51324.106640							Cluster-51324.123793				Cluster-51324.85774	Cluster-51324.141058				Cluster-51324.118633
Cluster-51324.83007		Cluster-51324.165237							Cluster-51324.115821				Cluster-51324.98951	Cluster-51324.70603				Cluster-51324.93566
Cluster-51324.57933		Cluster-51324.81065							Cluster-51324.59943				Cluster-51324.103315	Cluster-51324.42089				Cluster-51324.40320
Cluster-51324.116831		Cluster-51324.111696							Cluster-51324.104788				Cluster-51324.94307	Cluster-51324.99812				Cluster-51324.93449
Cluster-51324.123071		Cluster-51324.139211							Cluster-51324.50984				Cluster-51324.110269	Cluster-51324.92619				Cluster-51324.138962
Cluster-51324.129832		Cluster-51324.97675							Cluster-51324.63738				Cluster-51324.130528	Cluster-51324.117797				Cluster-51324.83675
Cluster-51324.85923		Cluster-51324.95839							Cluster-51324.91850				Cluster-51324.136373	Cluster-51324.105044				Cluster-51324.92859
Cluster-51324.100119		Cluster-51324.57037							Cluster-51324.94700				Cluster-51324.90632	Cluster-51324.105704				Cluster-51324.158635
Cluster-51324.154278		Cluster-51324.94283							Cluster-51324.94258				Cluster-51324.95577	Cluster-51324.84979				Cluster-51324.102017
Cluster-51324.140282		Cluster-51324.138210							Cluster-51324.81125				Cluster-51324.116207	Cluster-51324.101281				Cluster-51324.116748
Cluster-51324.59540		Cluster-51324.105379							Cluster-51324.104238				Cluster-51324.89012	Cluster-51324.162399				Cluster-51324.97712
Cluster-51324.126408		Cluster-51324.95544							Cluster-51324.15031				Cluster-51324.96580	Cluster-51324.56032				Cluster-51324.91946
Cluster-51324.67764		Cluster-51324.101553							Cluster-51324.92132				Cluster-51324.93994	Cluster-51324.52854				Cluster-51324.94280
Cluster-51324.86968		Cluster-51324.72844							Cluster-51324.40065				Cluster-51324.72430	Cluster-51324.92490				Cluster-51324.74087
Cluster-51324.45979		Cluster-51324.202780							Cluster-51324.164177				Cluster-51324.112376	Cluster-51324.93332				Cluster-51324.119114
Cluster-51324.96948		Cluster-51324.90979							Cluster-51324.36027				Cluster-51324.95351	Cluster-51324.86450				Cluster-51324.134816
Cluster-51324.155369		Cluster-51324.109987							Cluster-51324.99803				Cluster-51324.95064	Cluster-51324.82011				Cluster-51324.92298
Cluster-51324.166310		Cluster-51324.183129							Cluster-51324.95067				Cluster-51324.45441	Cluster-51324.68109				Cluster-51324.124857
Cluster-51324.79836		Cluster-51324.73962							Cluster-51324.52257				Cluster-51324.99575	Cluster-51324.48677				Cluster-51324.97202
Cluster-51324.112628		Cluster-51324.77135							Cluster-51324.112617				Cluster-51324.94682	Cluster-51324.143116				Cluster-51324.90775
Cluster-51324.192030		Cluster-51324.163573							Cluster-51324.85356				Cluster-51324.105663	Cluster-51324.155515				Cluster-51324.97441
Cluster-51324.95423		Cluster-51324.103279							Cluster-51324.90113				Cluster-51324.103052	Cluster-51324.134817				Cluster-51324.95590
Cluster-51324.94865		Cluster-51324.96031							Cluster-51324.113232				Cluster-51324.101717	Cluster-51324.23962				Cluster-51324.79610
Cluster-51324.69534		Cluster-51324.79703							Cluster-51324.59105				Cluster-51324.104515	Cluster-51324.80863				Cluster-51324.56548
Cluster-51324.57387		Cluster-51324.95031							Cluster-51324.124923				Cluster-51324.105434	Cluster-51324.84001				Cluster-51324.117494
Cluster-51324.52891		Cluster-51324.90259							Cluster-51324.33931				Cluster-51324.106675	Cluster-51324.88026				Cluster-51324.42301
Cluster-51324.99377		Cluster-51324.122360							Cluster-51324.91696				Cluster-51324.87942	Cluster-51324.123166				Cluster-51324.83756
Cluster-51324.79393		Cluster-51324.113420							Cluster-51324.93905				Cluster-51324.84659	Cluster-51324.106912				Cluster-51324.122714
Cluster-51324.76481		Cluster-51324.48863							Cluster-51324.115422				Cluster-51324.149063	Cluster-51324.83798				Cluster-51324.101020
Cluster-51324.95243		Cluster-51324.122534							Cluster-51324.75042				Cluster-51324.58804	Cluster-51324.91219				Cluster-51324.42426
Cluster-51324.110338		Cluster-51324.67451							Cluster-51324.55047				Cluster-51324.129659	Cluster-51324.68903				Cluster-51324.50215
Cluster-51324.54023		Cluster-51324.92137							Cluster-51324.101267				Cluster-51324.89893	Cluster-51324.138506				Cluster-51324.134191
Cluster-51324.93628		Cluster-51324.99041							Cluster-51324.94969				Cluster-51324.92569	Cluster-51324.83275				Cluster-51324.15281
Cluster-51324.89568		Cluster-51324.100871							Cluster-51324.142488				Cluster-51324.109912	Cluster-51324.57790				Cluster-51324.145244
Cluster-51324.78181		Cluster-51324.67698							Cluster-51324.146802				Cluster-51324.154854	Cluster-51324.128872				Cluster-51324.83119
Cluster-51324.99825		Cluster-51324.107081							Cluster-51324.150652				Cluster-51324.107053	Cluster-51324.94412				Cluster-51324.99845
Cluster-51324.175954		Cluster-51324.107711							Cluster-51324.78480				Cluster-51324.75820	Cluster-51324.118542				Cluster-51324.110216
Cluster-51324.99984		Cluster-51324.127065							Cluster-51324.123789				Cluster-51324.91311	Cluster-51324.147311				Cluster-51324.99487
Cluster-51324.77652		Cluster-51324.109812							Cluster-51324.54595				Cluster-51324.92184	Cluster-51324.157451				Cluster-51324.99216
Cluster-51324.102545		Cluster-51324.98638							Cluster-51324.52626				Cluster-51324.120007	Cluster-51324.155012				Cluster-51324.108060
Cluster-51324.96889		Cluster-51324.109899							Cluster-51324.103038				Cluster-51324.93513	Cluster-51324.97035				Cluster-51324.92015
Cluster-51324.153145		Cluster-51324.87919							Cluster-51324.144338				Cluster-51324.89836	Cluster-51324.82505				Cluster-51324.54105
Cluster-51324.51429		Cluster-51324.88404							Cluster-51324.120716				Cluster-51324.96540	Cluster-51324.94324				Cluster-51324.148444
Cluster-51324.118735		Cluster-51324.65402							Cluster-51324.63948				Cluster-51324.85355	Cluster-51324.102304				Cluster-51324.68341
Cluster-51324.101530		Cluster-51324.69302							Cluster-51324.209366				Cluster-51324.84309	Cluster-51324.114119				Cluster-51324.75084
Cluster-51324.192916		Cluster-51324.101782							Cluster-51324.79477				Cluster-51324.99818	Cluster-51324.56266				Cluster-51324.59700
Cluster-51324.111275		Cluster-51324.70239							Cluster-51324.106947				Cluster-51324.110265	Cluster-51324.84379				Cluster-51324.71118
Cluster-51324.85455		Cluster-51324.74495							Cluster-51324.69247				Cluster-51324.135430	Cluster-51324.69582				Cluster-51324.35524
Cluster-51324.52075		Cluster-51324.99530							Cluster-51324.117399				Cluster-51324.95033	Cluster-51324.92983				Cluster-51324.52547
Cluster-51324.87857		Cluster-51324.76619							Cluster-51324.106292				Cluster-51324.103906	Cluster-51324.154661				Cluster-51324.99976
Cluster-51324.59676		Cluster-51324.99285							Cluster-51324.165831				Cluster-51324.102938	Cluster-51324.91334				Cluster-51324.58079
Cluster-51324.95153		Cluster-51324.140029							Cluster-51324.64416				Cluster-51324.136732	Cluster-51324.103874				Cluster-51324.53223
Cluster-51324.95001		Cluster-51324.79931							Cluster-51324.15032				Cluster-51324.115759	Cluster-51324.99586				Cluster-51324.86704
Cluster-51324.83250		Cluster-51324.109876							Cluster-51324.187714				Cluster-51324.96603	Cluster-51324.130053				Cluster-51324.66871
Cluster-51324.90096		Cluster-51324.48627							Cluster-51324.88771				Cluster-51324.79746	Cluster-51324.101458				Cluster-51324.86603
Cluster-51324.129657		Cluster-51324.90124							Cluster-51324.86451				Cluster-51324.108551	Cluster-51324.112056				Cluster-51324.77924
Cluster-51324.57793		Cluster-51324.103920							Cluster-51324.94336				Cluster-51324.86138	Cluster-51324.78459				Cluster-51324.101404
Cluster-51324.121427		Cluster-51324.19157							Cluster-51324.94306				Cluster-51324.95041	Cluster-51324.126703				Cluster-51324.99942
Cluster-51324.35047		Cluster-51324.64329							Cluster-51324.29527				Cluster-51324.154533	Cluster-51324.118402				Cluster-51324.80220
Cluster-51324.89048		Cluster-51324.101481							Cluster-51324.123785				Cluster-51324.66240	Cluster-51324.91803				Cluster-51324.19380
Cluster-51324.54528		Cluster-51324.94478							Cluster-51324.94546				Cluster-51324.95438	Cluster-51324.179092				Cluster-51324.40898
Cluster-51324.104476		Cluster-51324.157347							Cluster-51324.97374				Cluster-51324.97904	Cluster-51324.56757				Cluster-51324.63979
Cluster-51324.72770		Cluster-51324.77276							Cluster-51324.141600				Cluster-51324.105408	Cluster-51324.65394				Cluster-51324.72497
Cluster-51324.102335		Cluster-51324.86550							Cluster-51324.51471				Cluster-51324.61968	Cluster-51324.125022				Cluster-51324.51160
Cluster-51324.137131		Cluster-51324.159941							Cluster-51324.141008				Cluster-51324.99451	Cluster-51324.78211				Cluster-51324.111819
Cluster-51324.97596		Cluster-51324.93227							Cluster-51324.120019				Cluster-51324.100610	Cluster-51324.77668				Cluster-51324.69125
Cluster-51324.201814		Cluster-51324.91194							Cluster-51324.47973				Cluster-51324.94908	Cluster-51324.72869				Cluster-51324.119074
Cluster-51324.79800		Cluster-51324.57098							Cluster-51324.63021				Cluster-51324.96558	Cluster-51324.97036				Cluster-51324.51814
Cluster-51324.103337		Cluster-51324.113853							Cluster-51324.15636				Cluster-51324.61328	Cluster-51324.58193				Cluster-51324.79613
Cluster-51324.101563		Cluster-51324.76321							Cluster-51324.178006				Cluster-51324.95180	Cluster-51324.175512				Cluster-51324.105964
Cluster-51324.53991		Cluster-51324.108810							Cluster-51324.131997				Cluster-51324.84246	Cluster-51324.145325				Cluster-51324.115484
Cluster-51324.87594		Cluster-51324.85840							Cluster-51324.42299				Cluster-51324.123335	Cluster-51324.109204				Cluster-51324.137848
Cluster-51324.118196		Cluster-51324.144476							Cluster-51324.70630				Cluster-51324.97092	Cluster-51324.79600				Cluster-51324.117200
Cluster-51324.55488		Cluster-51324.43182							Cluster-51324.120890				Cluster-51324.68223	Cluster-51324.97688				Cluster-51324.93150
Cluster-51324.153356		Cluster-51324.64406							Cluster-51324.90206				Cluster-51324.102383	Cluster-51324.155247				Cluster-51324.94575
Cluster-51324.43733		Cluster-51324.91277							Cluster-51324.123120				Cluster-51324.94739	Cluster-51324.62289				Cluster-51324.94598
Cluster-51324.92354		Cluster-51324.48776							Cluster-51324.50618				Cluster-51324.94606	Cluster-51324.74387				Cluster-51324.83236
Cluster-51324.115748		Cluster-51324.63557							Cluster-51324.106989				Cluster-51324.96250	Cluster-51324.89748				Cluster-51324.80515
Cluster-51324.108915		Cluster-51324.18366							Cluster-51324.52056				Cluster-51324.70042	Cluster-51324.74686				Cluster-51324.79108
Cluster-51324.75071		Cluster-51324.56525							Cluster-51324.95792				Cluster-51324.101285	Cluster-51324.68146				Cluster-51324.124965
Cluster-51324.90275		Cluster-51324.89174							Cluster-51324.75563				Cluster-51324.93517	Cluster-51324.109158				Cluster-51324.90821
Cluster-51324.94522		Cluster-51324.96162							Cluster-51324.86530				Cluster-51324.105812	Cluster-51324.90737				Cluster-51324.65506
Cluster-51324.99959		Cluster-51324.127834							Cluster-51324.50578				Cluster-51324.120923	Cluster-51324.12828				Cluster-51324.52608
Cluster-51324.90167		Cluster-51324.109807							Cluster-51324.113493				Cluster-51324.88978	Cluster-51324.98775				Cluster-51324.119836
Cluster-51324.90487		Cluster-51324.143607							Cluster-51324.66932				Cluster-51324.67439	Cluster-51324.80185				Cluster-51324.170692
Cluster-51324.79260		Cluster-51324.75862							Cluster-51324.83395				Cluster-51324.115725	Cluster-51324.165352				Cluster-51324.102641
Cluster-51324.154174		Cluster-51324.98009							Cluster-51324.84815				Cluster-51324.95668	Cluster-51324.46964				Cluster-51324.34133
Cluster-51324.134049		Cluster-51324.114187							Cluster-51324.126326				Cluster-51324.111556	Cluster-51324.121974				Cluster-51324.97966
Cluster-51324.93448		Cluster-51324.74765							Cluster-51324.186768				Cluster-51324.94046	Cluster-51324.88081				Cluster-51324.85490
Cluster-51324.78125		Cluster-51324.94886							Cluster-51324.154649				Cluster-51324.106713	Cluster-51324.64584				Cluster-51324.83279
Cluster-51324.96434		Cluster-51324.155719							Cluster-51324.91364				Cluster-51324.81871	Cluster-51324.106878				Cluster-51324.92014
Cluster-51324.104622		Cluster-51324.121865							Cluster-51324.115352				Cluster-51324.57161	Cluster-51324.104528				Cluster-51324.75842
Cluster-51324.106218		Cluster-51324.120038							Cluster-51324.107860				Cluster-51324.97111	Cluster-51324.104817				Cluster-51324.95312
Cluster-51324.116508		Cluster-51324.90718							Cluster-51324.168828				Cluster-51324.94401	Cluster-51324.123902				Cluster-51324.99804
Cluster-51324.158308		Cluster-51324.65833							Cluster-51324.125358				Cluster-51324.138006	Cluster-51324.164108				Cluster-51324.118342
Cluster-51324.84015		Cluster-51324.67491							Cluster-51324.120592				Cluster-51324.99113	Cluster-51324.137540				Cluster-51324.99874
Cluster-51324.117633		Cluster-51324.48893							Cluster-51324.77591				Cluster-51324.103759	Cluster-51324.135215				Cluster-51324.121130
Cluster-51324.120948		Cluster-51324.88343							Cluster-51324.132051				Cluster-51324.78808	Cluster-51324.104286				Cluster-51324.71217
Cluster-51324.95253		Cluster-51324.52641							Cluster-51324.47022				Cluster-51324.122125	Cluster-51324.76603				Cluster-51324.154638
Cluster-51324.81879		Cluster-51324.118182							Cluster-51324.127825				Cluster-51324.102505	Cluster-51324.49959				Cluster-51324.84874
Cluster-51324.67138		Cluster-51324.73742							Cluster-51324.100766				Cluster-51324.122349	Cluster-51324.119398				Cluster-51324.88790
Cluster-51324.175099		Cluster-51324.132711							Cluster-51324.139022				Cluster-51324.79373	Cluster-51324.105623				Cluster-51324.88347
Cluster-51324.111605		Cluster-51324.100097							Cluster-51324.102624				Cluster-51324.104943	Cluster-51324.133841				Cluster-51324.74756
Cluster-51324.102338		Cluster-51324.108285							Cluster-51324.104753				Cluster-51324.94213	Cluster-51324.98352				Cluster-51324.91790
Cluster-51324.95084		Cluster-51324.82271							Cluster-51324.99376				Cluster-51324.92739	Cluster-51324.90109				Cluster-51324.92769
Cluster-51324.146419		Cluster-51324.146366							Cluster-51324.73709				Cluster-51324.97507	Cluster-51324.105662				Cluster-51324.50360
Cluster-51324.181600		Cluster-51324.50487							Cluster-51324.94273				Cluster-51324.94918	Cluster-51324.92977				Cluster-51324.50359
Cluster-51324.67470		Cluster-51324.90709							Cluster-51324.120239				Cluster-51324.119547	Cluster-51324.116010				Cluster-51324.81105
Cluster-51324.81419		Cluster-51324.53900							Cluster-51324.148940				Cluster-51324.93542	Cluster-51324.64335				Cluster-51324.130085
Cluster-51324.99915		Cluster-51324.93016							Cluster-51324.104919				Cluster-51324.93843	Cluster-51324.99175				Cluster-51324.71654
Cluster-51324.141259		Cluster-51324.99618							Cluster-51324.111792				Cluster-51324.95140	Cluster-51324.155428				Cluster-51324.77259
Cluster-51324.129413		Cluster-51324.100850							Cluster-51324.140772				Cluster-51324.93947	Cluster-51324.111016				Cluster-51324.92853
Cluster-51324.108244		Cluster-51324.132395							Cluster-51324.53203				Cluster-51324.82750	Cluster-51324.90624				Cluster-51324.59925
Cluster-51324.71728		Cluster-51324.90594							Cluster-51324.141929				Cluster-51324.96294	Cluster-51324.95880				Cluster-51324.41184
Cluster-51324.69754		Cluster-51324.75231							Cluster-51324.152336				Cluster-51324.91252	Cluster-51324.14048				Cluster-51324.71976
Cluster-51324.96039		Cluster-51324.62053							Cluster-51324.110059				Cluster-51324.93160	Cluster-51324.92024				Cluster-51324.91592
Cluster-51324.105959		Cluster-51324.92506							Cluster-51324.57400				Cluster-51324.94173	Cluster-51324.98386				Cluster-51324.93686
Cluster-51324.85979		Cluster-51324.115855							Cluster-51324.140027				Cluster-51324.137608	Cluster-51324.158367				Cluster-51324.92691
Cluster-51324.98156		Cluster-51324.85799							Cluster-51324.51985				Cluster-51324.74385	Cluster-51324.117477				Cluster-51324.91118
Cluster-51324.152186		Cluster-51324.110653							Cluster-51324.94879				Cluster-51324.96127	Cluster-51324.118316				Cluster-51324.97716
Cluster-51324.103355		Cluster-51324.81465							Cluster-51324.88307				Cluster-51324.113393	Cluster-51324.185502				Cluster-51324.90153
Cluster-51324.82482		Cluster-51324.50327							Cluster-51324.145314				Cluster-51324.89957	Cluster-51324.125930				Cluster-51324.98017
Cluster-51324.167927		Cluster-51324.114335							Cluster-51324.137425				Cluster-51324.87088	Cluster-51324.52481				Cluster-51324.35386
Cluster-51324.130971		Cluster-51324.146492							Cluster-51324.143824				Cluster-51324.87085	Cluster-51324.87502				Cluster-51324.106182
Cluster-51324.62302		Cluster-51324.134037							Cluster-51324.122116				Cluster-51324.91740	Cluster-51324.107810				Cluster-51324.103850
Cluster-51324.10177		Cluster-51324.82152							Cluster-51324.60267				Cluster-51324.91470	Cluster-51324.81611				Cluster-51324.160420
Cluster-51324.108385		Cluster-51324.154492							Cluster-51324.150292				Cluster-51324.96694	Cluster-51324.71448				Cluster-51324.92651
Cluster-51324.93336		Cluster-51324.52112							Cluster-51324.33170				Cluster-51324.63853	Cluster-51324.79209				Cluster-51324.69975
Cluster-51324.97262		Cluster-51324.93519							Cluster-51324.72401				Cluster-51324.107820	Cluster-51324.109733				Cluster-51324.59207
Cluster-51324.93255		Cluster-51324.95592							Cluster-51324.92297				Cluster-51324.124287	Cluster-51324.82814				Cluster-51324.161271
Cluster-51324.92455		Cluster-51324.140924							Cluster-51324.130468				Cluster-51324.93158	Cluster-51324.87387				Cluster-51324.189104
Cluster-51324.42863		Cluster-51324.114477							Cluster-51324.124177				Cluster-51324.99572	Cluster-51324.91387				Cluster-51324.101794
Cluster-51324.94155		Cluster-51324.122217							Cluster-51324.62186				Cluster-51324.122506	Cluster-51324.162169				Cluster-51324.135939
Cluster-51324.32602		Cluster-51324.196548							Cluster-51324.86176				Cluster-51324.100696	Cluster-51324.105841				Cluster-51324.135519
Cluster-51324.102347		Cluster-51324.97344							Cluster-51324.118458				Cluster-51324.127317	Cluster-51324.124645				Cluster-51324.123917
Cluster-51324.126270		Cluster-51324.20754							Cluster-51324.134781				Cluster-51324.90968	Cluster-51324.72469				Cluster-51324.101156
Cluster-51324.104287		Cluster-51324.116396							Cluster-51324.93644				Cluster-51324.93938	Cluster-51324.57510				Cluster-51324.76790
Cluster-51324.98119		Cluster-51324.104504							Cluster-51324.95964				Cluster-51324.71605	Cluster-51324.74826				Cluster-51324.116507
Cluster-51324.94402		Cluster-51324.71965							Cluster-51324.147445				Cluster-51324.94314	Cluster-51324.74379				Cluster-51324.102468
Cluster-51324.58618		Cluster-51324.75951							Cluster-51324.70302				Cluster-51324.131368	Cluster-51324.86419				Cluster-51324.148866
Cluster-51324.141912		Cluster-51324.91665							Cluster-51324.67825				Cluster-51324.83806	Cluster-51324.75597				Cluster-51324.72847
Cluster-51324.90075		Cluster-51324.117050							Cluster-51324.93831				Cluster-51324.91674	Cluster-51324.95618				Cluster-51324.120300
Cluster-51324.79165		Cluster-51324.95132							Cluster-51324.114261				Cluster-51324.97221	Cluster-51324.118293				Cluster-51324.106236
Cluster-51324.92375		Cluster-51324.117305							Cluster-51324.152615				Cluster-51324.102139	Cluster-51324.111282				Cluster-51324.46005
Cluster-51324.44640		Cluster-51324.55404							Cluster-51324.20497				Cluster-51324.103146	Cluster-51324.38440				Cluster-51324.110972
Cluster-51324.147292		Cluster-51324.100483							Cluster-51324.94720				Cluster-51324.116155	Cluster-51324.142455				Cluster-51324.169550
Cluster-51324.84636		Cluster-51324.84496							Cluster-51324.161454				Cluster-51324.93053	Cluster-51324.125217				Cluster-51324.149737
Cluster-51324.158794		Cluster-51324.107982							Cluster-51324.95707				Cluster-51324.90054	Cluster-51324.106649				Cluster-51324.95751
Cluster-51324.93789		Cluster-51324.97383							Cluster-51324.59210				Cluster-51324.115004	Cluster-51324.99037				Cluster-51324.76046
Cluster-51324.84598		Cluster-51324.103321							Cluster-51324.82894				Cluster-51324.97070	Cluster-51324.97388				Cluster-51324.51928
Cluster-51324.127170		Cluster-51324.83084							Cluster-51324.42633				Cluster-51324.99960	Cluster-51324.86285				Cluster-51324.88597
Cluster-51324.124581		Cluster-51324.126582							Cluster-51324.111432				Cluster-51324.126327	Cluster-51324.69719				Cluster-51324.92285
Cluster-51324.88105		Cluster-51324.50918							Cluster-51324.92056				Cluster-51324.64799	Cluster-51324.104714				Cluster-51324.148185
Cluster-51324.83719		Cluster-51324.87843							Cluster-51324.107842				Cluster-51324.95310	Cluster-51324.68309				Cluster-51324.81084
Cluster-51324.105138		Cluster-51324.109348							Cluster-51324.61288				Cluster-51324.90060	Cluster-51324.87667				Cluster-51324.91730
Cluster-51324.122330		Cluster-51324.47660							Cluster-51324.93942				Cluster-51324.92471	Cluster-51324.32093				Cluster-51324.57202
Cluster-51324.99926		Cluster-51324.37937							Cluster-51324.49965				Cluster-51324.94586	Cluster-51324.111237				Cluster-51324.77067
Cluster-51324.95915		Cluster-51324.198238							Cluster-51324.107489				Cluster-51324.91135	Cluster-51324.92428				Cluster-51324.135698
Cluster-51324.144178		Cluster-51324.142143							Cluster-51324.110229				Cluster-51324.96495	Cluster-51324.126240				Cluster-51324.96514
Cluster-51324.44911		Cluster-51324.124135							Cluster-51324.116564				Cluster-51324.128648	Cluster-51324.78357				Cluster-51324.94785
Cluster-51324.120134		Cluster-51324.143441							Cluster-51324.92469				Cluster-51324.91226	Cluster-51324.118198				Cluster-51324.88914
Cluster-51324.53336		Cluster-51324.65343							Cluster-51324.41301				Cluster-51324.110106	Cluster-51324.74339				Cluster-51324.89109
Cluster-51324.45641		Cluster-51324.108648							Cluster-51324.155886				Cluster-51324.113351	Cluster-51324.127254				Cluster-51324.83016
Cluster-51324.87537		Cluster-51324.92468							Cluster-51324.100233				Cluster-51324.89294	Cluster-51324.82763				Cluster-51324.97442
Cluster-51324.149654		Cluster-51324.99968							Cluster-51324.162036				Cluster-51324.153226	Cluster-51324.105661				Cluster-51324.110683
Cluster-51324.86690		Cluster-51324.78518							Cluster-51324.581				Cluster-51324.118099	Cluster-51324.66941				Cluster-51324.84778
Cluster-51324.91937		Cluster-51324.52074							Cluster-51324.138117				Cluster-51324.95567	Cluster-51324.145089				Cluster-51324.116631
Cluster-51324.87453		Cluster-51324.140031							Cluster-51324.40533				Cluster-51324.61055	Cluster-51324.87526				Cluster-51324.114125
Cluster-51324.83730		Cluster-51324.155306							Cluster-51324.144188				Cluster-51324.149118	Cluster-51324.59728				Cluster-51324.153609
Cluster-51324.142767		Cluster-51324.98243							Cluster-51324.121461				Cluster-51324.130604	Cluster-51324.104915				Cluster-51324.94805
Cluster-51324.146622		Cluster-51324.82874							Cluster-51324.40214				Cluster-51324.98255	Cluster-51324.60213				Cluster-51324.88480
Cluster-51324.87853		Cluster-51324.132857							Cluster-51324.96608				Cluster-51324.111695	Cluster-51324.90961				Cluster-51324.65068
Cluster-51324.79704		Cluster-51324.30169							Cluster-51324.15316				Cluster-51324.92363	Cluster-51324.141243				Cluster-51324.20733
Cluster-51324.109810		Cluster-51324.46726							Cluster-51324.156604				Cluster-51324.100741	Cluster-51324.85215				Cluster-51324.152645
Cluster-51324.132194		Cluster-51324.89113							Cluster-51324.70163				Cluster-51324.91582	Cluster-51324.90160				Cluster-51324.128072
Cluster-51324.118728		Cluster-51324.80025							Cluster-51324.147736				Cluster-51324.100318	Cluster-51324.91988				Cluster-51324.112060
Cluster-51324.60599		Cluster-51324.104626							Cluster-51324.12880				Cluster-51324.81912	Cluster-51324.89536				Cluster-51324.109247
Cluster-51324.117840		Cluster-51324.49358							Cluster-51324.57204				Cluster-51324.106735	Cluster-51324.138596				Cluster-51324.135760
Cluster-51324.97640		Cluster-51324.69495							Cluster-51324.77830				Cluster-51324.102065	Cluster-51324.46999				Cluster-51324.84928
Cluster-51324.125518		Cluster-51324.50650							Cluster-51324.93733				Cluster-51324.84941	Cluster-51324.80973				Cluster-51324.105796
Cluster-51324.128865		Cluster-51324.90645							Cluster-51324.114254				Cluster-51324.99893	Cluster-51324.61024				Cluster-51324.96355
Cluster-51324.92970		Cluster-51324.157291							Cluster-51324.102825				Cluster-51324.128089	Cluster-51324.106951				Cluster-51324.126328
Cluster-51324.50187		Cluster-51324.138141							Cluster-51324.89394				Cluster-51324.94191	Cluster-51324.84310				Cluster-51324.145463
Cluster-51324.112781		Cluster-51324.96315							Cluster-51324.171388				Cluster-51324.115368	Cluster-51324.102706				Cluster-51324.53262
Cluster-51324.93936		Cluster-51324.101873							Cluster-51324.47864				Cluster-51324.138252	Cluster-51324.176936				Cluster-51324.89362
Cluster-51324.102449		Cluster-51324.74049							Cluster-51324.189815				Cluster-51324.96871	Cluster-51324.64939				Cluster-51324.146378
Cluster-51324.96709		Cluster-51324.105718							Cluster-51324.105421				Cluster-51324.91154	Cluster-51324.144776				Cluster-51324.62398
Cluster-51324.80256		Cluster-51324.127310							Cluster-51324.61430				Cluster-51324.43428	Cluster-51324.82253				Cluster-51324.50503
Cluster-51324.103224		Cluster-51324.70828							Cluster-51324.65449				Cluster-51324.97612	Cluster-51324.80891				Cluster-51324.100689
Cluster-51324.108331		Cluster-51324.93599							Cluster-51324.113734				Cluster-51324.89262	Cluster-51324.60202				Cluster-51324.57725
Cluster-51324.160872		Cluster-51324.107192							Cluster-51324.110857				Cluster-51324.110765	Cluster-51324.115648				Cluster-51324.99767
Cluster-51324.62788		Cluster-51324.55635							Cluster-51324.64078				Cluster-51324.86380	Cluster-51324.80894				Cluster-51324.84439
Cluster-51324.68205		Cluster-51324.31810							Cluster-51324.113285				Cluster-51324.62400	Cluster-51324.79363				Cluster-51324.52091
Cluster-51324.106791		Cluster-51324.72934							Cluster-51324.48606				Cluster-51324.84582	Cluster-51324.107806				Cluster-51324.78683
Cluster-51324.95721		Cluster-51324.11981							Cluster-51324.86257				Cluster-51324.20267	Cluster-51324.141558				Cluster-51324.43565
Cluster-51324.61886		Cluster-51324.97135							Cluster-51324.90265				Cluster-51324.95004	Cluster-51324.148738				Cluster-51324.145890
Cluster-51324.130445		Cluster-51324.111143							Cluster-51324.84929				Cluster-51324.103758	Cluster-51324.59589				Cluster-51324.93954
Cluster-51324.106592		Cluster-51324.104806							Cluster-51324.162722				Cluster-51324.84654	Cluster-51324.87501				Cluster-51324.96953
Cluster-51324.54809		Cluster-51324.106956							Cluster-51324.97968				Cluster-51324.92062	Cluster-51324.168727				Cluster-51324.115889
Cluster-51324.108516		Cluster-51324.83593							Cluster-51324.52845				Cluster-51324.94290	Cluster-51324.108527				Cluster-51324.120299
Cluster-51324.65803		Cluster-51324.54385							Cluster-51324.95593				Cluster-51324.45039	Cluster-51324.105452				Cluster-51324.187491
Cluster-51324.96677		Cluster-51324.149217							Cluster-51324.88595				Cluster-51324.58923	Cluster-51324.86759				Cluster-51324.173280
Cluster-51324.87049		Cluster-51324.100306							Cluster-51324.56143				Cluster-51324.94189	Cluster-51324.85964				Cluster-51324.139164
Cluster-51324.85039		Cluster-51324.109534							Cluster-51324.148916				Cluster-51324.83405	Cluster-51324.84656				Cluster-51324.189477
Cluster-51324.54325		Cluster-51324.26501							Cluster-51324.158783				Cluster-51324.95314	Cluster-51324.110322				Cluster-51324.46428
Cluster-51324.101849		Cluster-51324.68808							Cluster-51324.86249				Cluster-51324.93980	Cluster-51324.126473				Cluster-51324.98217
Cluster-51324.74845		Cluster-51324.182476							Cluster-51324.93392				Cluster-51324.95100	Cluster-51324.105204				Cluster-51324.94224
Cluster-51324.161123		Cluster-51324.65364							Cluster-51324.84878				Cluster-51324.98159	Cluster-51324.177258				Cluster-51324.91731
Cluster-51324.122431		Cluster-51324.120913							Cluster-51324.122278				Cluster-51324.91955	Cluster-51324.113442				Cluster-51324.92332
Cluster-51324.86483		Cluster-51324.90693							Cluster-51324.168887				Cluster-51324.86816	Cluster-51324.151410				Cluster-51324.45780
Cluster-51324.52666		Cluster-51324.50204							Cluster-51324.87548				Cluster-51324.91983	Cluster-51324.53936				Cluster-51324.123738
Cluster-51324.170304		Cluster-51324.93456							Cluster-51324.98015				Cluster-51324.69701	Cluster-51324.93265				Cluster-51324.87268
Cluster-51324.44515		Cluster-51324.75721							Cluster-51324.76002				Cluster-51324.94278	Cluster-51324.89989				Cluster-51324.107533
Cluster-51324.137292		Cluster-51324.118156							Cluster-51324.52999				Cluster-51324.89454	Cluster-51324.85542				Cluster-51324.101944
Cluster-51324.97895		Cluster-51324.97587							Cluster-51324.46316				Cluster-51324.91347	Cluster-51324.151539				Cluster-51324.60087
Cluster-51324.113134		Cluster-51324.90575							Cluster-51324.121357				Cluster-51324.94170	Cluster-51324.87998				Cluster-51324.110938
Cluster-51324.144568		Cluster-51324.114567							Cluster-51324.156628				Cluster-51324.66780	Cluster-51324.97156				Cluster-51324.86750
Cluster-51324.78592		Cluster-51324.135523							Cluster-51324.143703				Cluster-51324.89116	Cluster-51324.60579				Cluster-51324.114123
Cluster-51324.121824		Cluster-51324.125961							Cluster-51324.103036				Cluster-51324.174131	Cluster-51324.101161				Cluster-51324.106731
Cluster-51324.105855		Cluster-51324.84826							Cluster-51324.150295				Cluster-51324.93721	Cluster-51324.58986				Cluster-51324.115745
Cluster-51324.67188		Cluster-51324.34199							Cluster-51324.110434				Cluster-51324.104969	Cluster-51324.112088				Cluster-51324.95853
Cluster-51324.98739		Cluster-51324.151833							Cluster-51324.82875				Cluster-51324.95954	Cluster-51324.150011				Cluster-51324.88716
Cluster-51324.143253		Cluster-51324.44509							Cluster-51324.87459				Cluster-51324.91786	Cluster-51324.100626				Cluster-51324.100282
Cluster-51324.102507		Cluster-51324.60431							Cluster-51324.110695				Cluster-51324.108182	Cluster-51324.99722				Cluster-51324.146958
Cluster-51324.93739		Cluster-51324.81604							Cluster-51324.57532				Cluster-51324.98714	Cluster-51324.107482				Cluster-51324.98222
Cluster-51324.154529		Cluster-51324.117610							Cluster-51324.82877				Cluster-51324.94544	Cluster-51324.66316				Cluster-51324.113565
Cluster-51324.194148		Cluster-51324.86480							Cluster-51324.50120				Cluster-51324.90138	Cluster-51324.43693				Cluster-51324.85319
Cluster-51324.54805		Cluster-51324.158920							Cluster-51324.23730				Cluster-51324.100608	Cluster-51324.102653				Cluster-51324.80020
Cluster-51324.46229		Cluster-51324.138367							Cluster-51324.129177				Cluster-51324.104813	Cluster-51324.133821				Cluster-51324.115537
Cluster-51324.117619		Cluster-51324.60568							Cluster-51324.75001				Cluster-51324.92778	Cluster-51324.88791				Cluster-51324.141021
Cluster-51324.55646		Cluster-51324.95583							Cluster-51324.94656				Cluster-51324.104497	Cluster-51324.154436				Cluster-51324.96346
Cluster-51324.131796		Cluster-51324.108281							Cluster-51324.139456				Cluster-51324.105170	Cluster-51324.93452				Cluster-51324.42069
Cluster-51324.92886		Cluster-51324.107527							Cluster-51324.42749				Cluster-51324.140673	Cluster-51324.96921				Cluster-51324.81959
Cluster-51324.52366		Cluster-51324.21010							Cluster-51324.125780				Cluster-51324.92340	Cluster-51324.59873				Cluster-51324.81916
Cluster-51324.64217		Cluster-51324.112680							Cluster-51324.84472				Cluster-51324.83827	Cluster-51324.122358				Cluster-51324.133096
Cluster-51324.81768		Cluster-51324.104251							Cluster-51324.94466				Cluster-51324.114414	Cluster-51324.65169				Cluster-51324.96750
Cluster-51324.61964		Cluster-51324.111039							Cluster-51324.144854				Cluster-51324.89281	Cluster-51324.143922				Cluster-51324.121821
Cluster-51324.66220		Cluster-51324.125774							Cluster-51324.97544				Cluster-51324.86645	Cluster-51324.83311				Cluster-51324.50505
Cluster-51324.30920		Cluster-51324.74116							Cluster-51324.148790				Cluster-51324.102611	Cluster-51324.109155				Cluster-51324.102642
Cluster-51324.146719		Cluster-51324.74555							Cluster-51324.77828				Cluster-51324.91002	Cluster-51324.87494				Cluster-51324.121131
Cluster-51324.86235		Cluster-51324.138776							Cluster-51324.30143				Cluster-51324.100762	Cluster-51324.117566				Cluster-51324.112045
Cluster-51324.64041		Cluster-51324.97099							Cluster-51324.125346				Cluster-51324.109548	Cluster-51324.55942				Cluster-51324.81067
Cluster-51324.93296		Cluster-51324.120691							Cluster-51324.79939				Cluster-51324.51980	Cluster-51324.88753				Cluster-51324.79261
Cluster-51324.136886		Cluster-51324.101151							Cluster-51324.69797				Cluster-65361.0	Cluster-51324.132483				Cluster-51324.116044
Cluster-51324.52637		Cluster-51324.108980							Cluster-51324.90610				Cluster-51324.114157	Cluster-51324.118279				Cluster-51324.90316
Cluster-51324.68875		Cluster-51324.118670							Cluster-51324.43327				Cluster-51324.98492	Cluster-51324.96539				Cluster-51324.88171
Cluster-51324.108325		Cluster-51324.98571							Cluster-51324.154735				Cluster-51324.80321	Cluster-51324.84978				Cluster-51324.79176
Cluster-51324.145789		Cluster-51324.98091							Cluster-51324.145445				Cluster-51324.68233	Cluster-51324.159713				Cluster-51324.77414
Cluster-51324.109010		Cluster-51324.86508							Cluster-51324.155916				Cluster-51324.107595	Cluster-51324.125755				Cluster-51324.108361
Cluster-51324.112380		Cluster-51324.16740							Cluster-51324.65323				Cluster-51324.82724	Cluster-51324.97291				Cluster-51324.126727
Cluster-51324.142678		Cluster-51324.93640							Cluster-51324.51910				Cluster-51324.132476	Cluster-51324.138199				Cluster-51324.78134
Cluster-51324.133208		Cluster-51324.124175							Cluster-51324.78521				Cluster-51324.73713	Cluster-51324.141364				Cluster-51324.142326
Cluster-51324.133801		Cluster-51324.10176							Cluster-51324.117902				Cluster-51324.122621	Cluster-51324.79700				Cluster-51324.166425
Cluster-51324.156834		Cluster-51324.74535							Cluster-51324.137895				Cluster-51324.86018	Cluster-51324.49472				Cluster-51324.93465
Cluster-51324.144089		Cluster-51324.164152							Cluster-51324.83789				Cluster-51324.96678	Cluster-51324.120532				Cluster-51324.116842
Cluster-51324.74626		Cluster-51324.161630							Cluster-51324.133981				Cluster-51324.94157	Cluster-51324.48610				Cluster-51324.132390
Cluster-51324.83139		Cluster-51324.97943							Cluster-51324.88462				Cluster-51324.107258	Cluster-51324.109981				Cluster-51324.126441
Cluster-51324.38522		Cluster-51324.76160							Cluster-51324.19717				Cluster-51324.109238	Cluster-51324.125124				Cluster-51324.98510
Cluster-51324.160484		Cluster-51324.95241							Cluster-51324.147735				Cluster-51324.63393	Cluster-51324.138398				Cluster-51324.92552
Cluster-51324.98796		Cluster-51324.104443							Cluster-51324.133842				Cluster-51324.125679	Cluster-51324.45564				Cluster-51324.93916
Cluster-51324.81381		Cluster-51324.86680							Cluster-51324.141113				Cluster-51324.136795	Cluster-51324.97871				Cluster-51324.111739
Cluster-51324.121846		Cluster-51324.97552							Cluster-51324.105134				Cluster-51324.62387	Cluster-51324.83309				Cluster-51324.47021
Cluster-51324.68882		Cluster-51324.188350							Cluster-51324.116618				Cluster-51324.89335	Cluster-51324.90200				Cluster-51324.52419
Cluster-51324.54149		Cluster-51324.95886							Cluster-51324.36470				Cluster-51324.89245	Cluster-51324.103546				Cluster-51324.107037
Cluster-51324.159973		Cluster-51324.71059							Cluster-51324.143349				Cluster-51324.69214	Cluster-51324.117725				Cluster-51324.94520
Cluster-51324.133372		Cluster-51324.71674							Cluster-51324.136161				Cluster-51324.126788	Cluster-51324.112050				Cluster-51324.118181
Cluster-51324.110916		Cluster-51324.87994							Cluster-51324.166717				Cluster-51324.95540	Cluster-51324.100918				Cluster-51324.70062
Cluster-51324.81761		Cluster-51324.120625							Cluster-51324.71399				Cluster-51324.107301	Cluster-51324.163076				Cluster-51324.151521
Cluster-51324.120547		Cluster-51324.48208							Cluster-51324.36393				Cluster-51324.86980	Cluster-51324.67135				Cluster-51324.90162
Cluster-51324.127640		Cluster-51324.62159							Cluster-51324.28489				Cluster-51324.86610	Cluster-51324.147435				Cluster-51324.68250
Cluster-51324.59008		Cluster-51324.93596							Cluster-51324.120177				Cluster-51324.97172	Cluster-51324.149227				Cluster-51324.152310
Cluster-51324.49719		Cluster-51324.68454							Cluster-51324.119586				Cluster-51324.93049	Cluster-51324.94379				Cluster-51324.50370
Cluster-51324.54428		Cluster-51324.87918							Cluster-51324.96900				Cluster-51324.90686	Cluster-51324.110225				Cluster-51324.107832
Cluster-51324.180119		Cluster-51324.100089							Cluster-51324.95899				Cluster-51324.91715	Cluster-51324.159971				Cluster-51324.80246
Cluster-51324.89047		Cluster-51324.75489							Cluster-51324.88543				Cluster-51324.90689	Cluster-51324.76886				Cluster-51324.82525
Cluster-51324.124907		Cluster-51324.5245							Cluster-51324.51987				Cluster-51324.91675	Cluster-51324.65410				Cluster-51324.145760
Cluster-51324.125989		Cluster-51324.101557							Cluster-51324.38312				Cluster-51324.127708	Cluster-51324.124497				Cluster-51324.117493
Cluster-51324.100409		Cluster-51324.122884							Cluster-51324.144344				Cluster-51324.96367	Cluster-51324.59805				Cluster-51324.96001
Cluster-51324.101250		Cluster-51324.48624							Cluster-51324.77956				Cluster-51324.94616	Cluster-51324.62856				Cluster-51324.92889
Cluster-51324.92152		Cluster-51324.125119							Cluster-51324.101772				Cluster-51324.98897	Cluster-51324.148443				Cluster-51324.92813
Cluster-51324.117920		Cluster-51324.139931							Cluster-51324.126772				Cluster-51324.142860	Cluster-51324.71886				Cluster-51324.85230
Cluster-51324.145614		Cluster-51324.76381							Cluster-51324.54854				Cluster-51324.64949	Cluster-51324.79968				Cluster-51324.85245
Cluster-51324.90232		Cluster-51324.194729							Cluster-51324.66836				Cluster-51324.88356	Cluster-51324.103206				Cluster-51324.178551
Cluster-51324.92071		Cluster-51324.141428							Cluster-51324.125330				Cluster-51324.60065	Cluster-51324.96831				Cluster-51324.151629
Cluster-51324.112285		Cluster-51324.85085							Cluster-51324.78774				Cluster-51324.95931	Cluster-51324.105328				Cluster-51324.176675
Cluster-51324.72870		Cluster-51324.95208							Cluster-51324.71748				Cluster-51324.92051	Cluster-51324.73872				Cluster-51324.47340
Cluster-51324.127531		Cluster-51324.60753							Cluster-51324.100310				Cluster-51324.65412	Cluster-51324.138201				Cluster-51324.104569
Cluster-51324.109003		Cluster-51324.67824							Cluster-51324.96853				Cluster-51324.107465	Cluster-51324.122026				Cluster-51324.93704
Cluster-51324.81519		Cluster-51324.131154							Cluster-51324.159844				Cluster-51324.116901	Cluster-51324.151004				Cluster-51324.44710
Cluster-51324.68292		Cluster-51324.108854							Cluster-51324.91616				Cluster-51324.97718	Cluster-51324.115849				Cluster-51324.83717
Cluster-51324.99122		Cluster-51324.98068							Cluster-51324.96318				Cluster-51324.170255	Cluster-51324.82889				Cluster-51324.114646
Cluster-51324.93828		Cluster-51324.78066							Cluster-51324.98183				Cluster-51324.141554	Cluster-51324.123901				Cluster-51324.49963
Cluster-51324.98364		Cluster-51324.78850											Cluster-51324.102387	Cluster-51324.103105				Cluster-51324.94743
Cluster-51324.107464		Cluster-51324.73437											Cluster-51324.95965	Cluster-51324.61664				Cluster-51324.117491
Cluster-51324.127946		Cluster-51324.51757											Cluster-51324.79138	Cluster-51324.45719				Cluster-51324.130117
Cluster-51324.88778		Cluster-51324.99848											Cluster-51324.69480	Cluster-51324.98993				Cluster-51324.71898
Cluster-51324.37412		Cluster-51324.154274											Cluster-51324.136513	Cluster-51324.38874				Cluster-51324.95403
Cluster-51324.146765		Cluster-51324.75861											Cluster-51324.110428	Cluster-51324.100149				Cluster-51324.92504
Cluster-51324.102783		Cluster-51324.57252											Cluster-51324.89391	Cluster-51324.99266				Cluster-51324.146257
Cluster-51324.99018		Cluster-51324.82689											Cluster-51324.55184	Cluster-51324.144775				Cluster-51324.119055
Cluster-51324.88807		Cluster-51324.106667											Cluster-51324.86258	Cluster-51324.48222				Cluster-51324.135789
Cluster-51324.105078		Cluster-51324.93512											Cluster-51324.89358	Cluster-51324.149564				Cluster-51324.118543
Cluster-51324.143029		Cluster-51324.68877											Cluster-51324.76769	Cluster-51324.95866				Cluster-51324.131379
Cluster-51324.123889		Cluster-51324.120305											Cluster-51324.91861	Cluster-51324.131607				Cluster-51324.112630
Cluster-51324.96268		Cluster-51324.94424											Cluster-51324.94470	Cluster-51324.108379				Cluster-51324.68416
Cluster-51324.71979		Cluster-51324.141798											Cluster-51324.70913	Cluster-51324.96212				Cluster-51324.51353
Cluster-51324.85593		Cluster-51324.97680											Cluster-51324.98550	Cluster-51324.84084				Cluster-51324.165794
Cluster-51324.115746		Cluster-51324.93937											Cluster-51324.114897	Cluster-51324.81889				Cluster-51324.85564
Cluster-51324.98985		Cluster-51324.95784											Cluster-51324.116130	Cluster-51324.126361				Cluster-51324.114387
Cluster-51324.103430		Cluster-51324.98869											Cluster-51324.105299	Cluster-51324.92260				Cluster-51324.112572
Cluster-51324.94303		Cluster-51324.154328											Cluster-51324.95257	Cluster-51324.107369				Cluster-51324.114668
Cluster-51324.85677		Cluster-51324.54393											Cluster-51324.104363	Cluster-51324.142031				Cluster-51324.141930
Cluster-51324.112904		Cluster-51324.108750											Cluster-51324.129251	Cluster-51324.173331				Cluster-51324.65461
Cluster-51324.94234		Cluster-51324.48175											Cluster-51324.98099	Cluster-51324.134038				Cluster-51324.145825
Cluster-51324.142690		Cluster-51324.107263											Cluster-51324.93532	Cluster-51324.72424				Cluster-51324.77188
Cluster-51324.67078		Cluster-51324.66418											Cluster-51324.83390	Cluster-51324.73598				Cluster-51324.106389
Cluster-51324.48519		Cluster-51324.76747											Cluster-51324.99469	Cluster-51324.79216				Cluster-51324.84395
Cluster-51324.121252		Cluster-51324.111568											Cluster-51324.121336	Cluster-51324.110275				Cluster-51324.139679
Cluster-51324.102650		Cluster-51324.123422											Cluster-51324.100760	Cluster-51324.106762				Cluster-51324.48166
Cluster-51324.51135		Cluster-51324.75486											Cluster-51324.111699	Cluster-51324.115792				Cluster-51324.116726
Cluster-51324.90513		Cluster-51324.199319											Cluster-51324.85978	Cluster-51324.96136				Cluster-51324.78968
Cluster-51324.176342		Cluster-51324.94492											Cluster-51324.99475	Cluster-51324.84975				Cluster-51324.90620
Cluster-51324.86699		Cluster-51324.156567											Cluster-51324.84159	Cluster-51324.101684				Cluster-51324.92602
Cluster-51324.97533		Cluster-51324.36295											Cluster-51324.91664	Cluster-51324.116843				Cluster-51324.53368
Cluster-51324.103580		Cluster-51324.118740											Cluster-51324.111239	Cluster-51324.91966				Cluster-51324.86489
Cluster-51324.46040		Cluster-51324.88793											Cluster-51324.78781	Cluster-51324.115066				Cluster-51324.101587
Cluster-51324.100801		Cluster-51324.84557											Cluster-51324.90205	Cluster-51324.128879				Cluster-51324.96132
Cluster-51324.92988		Cluster-51324.102147											Cluster-51324.82506	Cluster-51324.52017				Cluster-51324.92060
Cluster-51324.93677		Cluster-51324.63009											Cluster-51324.90422	Cluster-51324.58739				Cluster-51324.39824
Cluster-51324.115739		Cluster-51324.144669											Cluster-51324.104176	Cluster-51324.84785				Cluster-51324.63935
Cluster-51324.85882		Cluster-51324.132176											Cluster-51324.89808	Cluster-51324.100236				Cluster-51324.92812
Cluster-51324.61561		Cluster-51324.82335											Cluster-51324.128010	Cluster-51324.109646				Cluster-51324.53090
Cluster-51324.14269		Cluster-51324.112948											Cluster-51324.98973	Cluster-51324.78455				Cluster-51324.92012
Cluster-51324.98038		Cluster-51324.87255											Cluster-51324.91699	Cluster-51324.71743				Cluster-51324.73585
Cluster-51324.83453		Cluster-51324.99157											Cluster-51324.95040	Cluster-51324.115139				Cluster-51324.78123
Cluster-51324.80098		Cluster-51324.117986											Cluster-51324.92951	Cluster-51324.126857				Cluster-51324.126409
Cluster-51324.93732		Cluster-51324.96325											Cluster-51324.151002	Cluster-51324.125116				Cluster-51324.47627
Cluster-51324.100599		Cluster-51324.112036											Cluster-51324.120816	Cluster-51324.77369				Cluster-51324.111820
Cluster-51324.80101		Cluster-51324.108604											Cluster-51324.148321	Cluster-51324.84321				Cluster-51324.96083
Cluster-51324.6938		Cluster-51324.194204											Cluster-51324.94866	Cluster-51324.92376				Cluster-51324.89434
Cluster-51324.118012		Cluster-51324.146205											Cluster-51324.114766	Cluster-51324.134335				Cluster-51324.96005
Cluster-51324.18040		Cluster-51324.107637											Cluster-51324.112959	Cluster-51324.128146				Cluster-51324.68776
Cluster-51324.151516		Cluster-51324.135838											Cluster-51324.62837	Cluster-51324.107166				Cluster-51324.95927
Cluster-51324.91515		Cluster-51324.61713											Cluster-51324.94228	Cluster-51324.106568				Cluster-51324.76495
Cluster-51324.78970		Cluster-51324.88433											Cluster-51324.109055	Cluster-51324.75371				Cluster-51324.61690
Cluster-51324.148577		Cluster-51324.153240											Cluster-51324.115080	Cluster-51324.158517				Cluster-51324.155502
Cluster-51324.32550		Cluster-51324.117122											Cluster-51324.84595	Cluster-51324.110277				Cluster-51324.57885
Cluster-51324.147022		Cluster-51324.57484											Cluster-51324.102382	Cluster-51324.111762				Cluster-51324.83160
Cluster-51324.103831		Cluster-51324.198845											Cluster-51324.95036	Cluster-51324.108145				Cluster-51324.77611
Cluster-51324.86273		Cluster-51324.110018											Cluster-51324.92077	Cluster-51324.118306				Cluster-51324.114958
Cluster-51324.153111		Cluster-51324.117214											Cluster-51324.50504	Cluster-51324.83214				Cluster-51324.65752
Cluster-51324.51540		Cluster-51324.151599											Cluster-51324.96581	Cluster-51324.87888				Cluster-51324.137232
Cluster-51324.63366		Cluster-51324.87192											Cluster-51324.98546	Cluster-51324.119076				Cluster-51324.104627
Cluster-51324.122960		Cluster-51324.94504											Cluster-51324.115673	Cluster-51324.168903				Cluster-51324.89933
Cluster-51324.108320		Cluster-51324.111848											Cluster-51324.95986	Cluster-51324.165885				Cluster-51324.103944
Cluster-51324.63698		Cluster-51324.71009											Cluster-51324.94704	Cluster-51324.108825				Cluster-51324.93432
Cluster-51324.103431		Cluster-51324.110784											Cluster-51324.89415	Cluster-51324.88313				Cluster-51324.55048
Cluster-51324.149739		Cluster-51324.106880											Cluster-51324.92294	Cluster-51324.78209				Cluster-51324.77267
Cluster-51324.76940		Cluster-51324.44471											Cluster-51324.90694	Cluster-51324.95846				Cluster-51324.90155
Cluster-51324.67506		Cluster-51324.171206											Cluster-51324.89653	Cluster-51324.84699				Cluster-51324.123165
Cluster-51324.106101		Cluster-51324.178753											Cluster-51324.93880	Cluster-51324.105084				Cluster-51324.120833
Cluster-51324.136906		Cluster-51324.86668											Cluster-51324.106220	Cluster-51324.117091				Cluster-51324.70998
Cluster-51324.88795		Cluster-51324.95481											Cluster-51324.97515	Cluster-51324.145814				Cluster-51324.145342
Cluster-51324.111043		Cluster-51324.82942											Cluster-51324.67122	Cluster-51324.71666				Cluster-51324.45220
Cluster-51324.94686		Cluster-51324.117243											Cluster-51324.97071	Cluster-51324.105897				Cluster-51324.142518
Cluster-51324.91134		Cluster-51324.150377											Cluster-51324.88953	Cluster-51324.91707				Cluster-51324.176971
Cluster-51324.135715		Cluster-51324.164241											Cluster-51324.90273	Cluster-51324.123750				Cluster-51324.91541
Cluster-51324.92622		Cluster-51324.81163											Cluster-51324.101609	Cluster-51324.78636				Cluster-51324.134087
Cluster-51324.88173		Cluster-51324.155220											Cluster-51324.103964	Cluster-51324.78243				Cluster-51324.94440
Cluster-51324.117543		Cluster-51324.114598											Cluster-51324.104699	Cluster-51324.83600				Cluster-51324.81476
Cluster-51324.46522		Cluster-51324.109849											Cluster-51324.93912	Cluster-51324.109073				Cluster-51324.86656
Cluster-51324.98719		Cluster-51324.158223											Cluster-51324.93370	Cluster-51324.111640				Cluster-51324.109369
Cluster-51324.49915		Cluster-51324.91213											Cluster-51324.131111	Cluster-51324.100692				Cluster-51324.109694
Cluster-51324.63644		Cluster-51324.114132											Cluster-51324.83028	Cluster-51324.104636				Cluster-51324.97655
Cluster-51324.90161		Cluster-51324.97297											Cluster-51324.94952	Cluster-51324.86229				Cluster-51324.100806
Cluster-51324.205887		Cluster-51324.117671											Cluster-51324.96611	Cluster-51324.111386				Cluster-51324.110331
Cluster-51324.76032		Cluster-51324.32585											Cluster-51324.96693	Cluster-51324.61020				Cluster-51324.75889
Cluster-51324.101768		Cluster-51324.116960											Cluster-51324.106832	Cluster-51324.76384				Cluster-51324.144769
Cluster-51324.104819		Cluster-51324.162073											Cluster-51324.91198	Cluster-51324.112905				Cluster-51324.73502
Cluster-51324.87209		Cluster-51324.112985											Cluster-51324.95085	Cluster-51324.116998				Cluster-51324.167198
Cluster-51324.105231		Cluster-51324.97739											Cluster-51324.89223	Cluster-51324.98285				Cluster-51324.75354
Cluster-51324.95368		Cluster-51324.92625											Cluster-51324.47887	Cluster-51324.92319				Cluster-51324.89491
Cluster-51324.151645		Cluster-51324.166400											Cluster-51324.119699	Cluster-51324.163696				Cluster-51324.72576
Cluster-51324.102012		Cluster-51324.115112											Cluster-51324.93436	Cluster-51324.116388				Cluster-51324.87462
Cluster-51324.110246		Cluster-51324.91742											Cluster-51324.80215	Cluster-51324.59254				Cluster-51324.41265
Cluster-51324.42827		Cluster-51324.83050											Cluster-51324.103463	Cluster-51324.90150				Cluster-51324.104124
Cluster-51324.191101		Cluster-51324.45086											Cluster-51324.88821	Cluster-51324.97843				Cluster-51324.92819
Cluster-51324.102459		Cluster-51324.191743											Cluster-51324.109766	Cluster-51324.87224				Cluster-51324.86708
Cluster-51324.87122		Cluster-51324.65250											Cluster-51324.85918	Cluster-51324.69259				Cluster-51324.91708
Cluster-51324.69370		Cluster-51324.70193											Cluster-51324.95200	Cluster-51324.11542				Cluster-51324.147665
Cluster-51324.87265		Cluster-51324.85134											Cluster-51324.118932	Cluster-51324.121512				Cluster-51324.123812
Cluster-51324.180883		Cluster-51324.111396											Cluster-51324.83610	Cluster-51324.127972				Cluster-51324.76247
Cluster-51324.58557		Cluster-51324.74718											Cluster-51324.95068	Cluster-51324.48768				Cluster-51324.112551
Cluster-51324.90440		Cluster-51324.130178											Cluster-51324.95146	Cluster-51324.76601				Cluster-51324.99399
Cluster-51324.93625		Cluster-51324.96140											Cluster-51324.107630	Cluster-51324.92618				Cluster-51324.76266
Cluster-51324.84127		Cluster-51324.84428											Cluster-51324.95436	Cluster-51324.130709				Cluster-51324.72064
Cluster-51324.126664		Cluster-51324.93750											Cluster-51324.90267	Cluster-51324.77297				Cluster-51324.69018
Cluster-51324.57659		Cluster-51324.122321											Cluster-51324.111582	Cluster-51324.91646				Cluster-51324.80083
Cluster-51324.81937		Cluster-51324.112803											Cluster-51324.88661	Cluster-51324.91497				Cluster-51324.108512
Cluster-51324.86471		Cluster-51324.16507											Cluster-51324.66634	Cluster-51324.135193				Cluster-51324.75671
Cluster-51324.85219		Cluster-51324.64633											Cluster-51324.89584	Cluster-51324.157351				Cluster-51324.84038
Cluster-51324.172791		Cluster-51324.18501											Cluster-51324.112534	Cluster-51324.93802				Cluster-51324.78364
Cluster-51324.118325		Cluster-51324.89651											Cluster-51324.101487	Cluster-51324.127698				Cluster-51324.63223
Cluster-51324.91383		Cluster-51324.118585											Cluster-51324.106804	Cluster-51324.112014				Cluster-51324.71486
Cluster-51324.75740		Cluster-51324.107069											Cluster-51324.94978	Cluster-51324.112813				Cluster-51324.107264
Cluster-51324.105644		Cluster-51324.163636											Cluster-51324.127968	Cluster-51324.118993				Cluster-51324.72893
Cluster-51324.113488		Cluster-51324.79558											Cluster-51324.102490	Cluster-51324.81048				Cluster-51324.89078
Cluster-51324.94685		Cluster-51324.91151											Cluster-51324.65706	Cluster-51324.108388				Cluster-51324.109524
Cluster-51324.107321		Cluster-51324.112468											Cluster-51324.72837	Cluster-51324.44149				Cluster-51324.51437
Cluster-51324.61729		Cluster-51324.30380											Cluster-51324.69629	Cluster-51324.85122				Cluster-51324.89214
Cluster-51324.83284		Cluster-51324.103016											Cluster-51324.92879	Cluster-51324.135889				Cluster-51324.142744
Cluster-51324.106384		Cluster-51324.74265											Cluster-51324.133802	Cluster-51324.117325				Cluster-51324.87411
Cluster-51324.88616		Cluster-51324.106909											Cluster-51324.86939	Cluster-51324.41412				Cluster-51324.120718
Cluster-51324.108885		Cluster-51324.12399											Cluster-51324.89603	Cluster-51324.32616				Cluster-51324.114067
Cluster-51324.149493		Cluster-51324.206213											Cluster-51324.89486	Cluster-51324.106767				Cluster-51324.139100
Cluster-51324.148479		Cluster-51324.127575											Cluster-51324.94298	Cluster-51324.95730				Cluster-51324.117498
Cluster-51324.52464		Cluster-51324.196478											Cluster-51324.142374	Cluster-51324.153126				Cluster-51324.109285
Cluster-51324.95392		Cluster-51324.104998											Cluster-51324.96683	Cluster-51324.95213				Cluster-51324.120050
Cluster-51324.91728		Cluster-51324.85870											Cluster-51324.88482	Cluster-51324.106848				Cluster-51324.92641
Cluster-51324.78326		Cluster-51324.138718											Cluster-51324.94961	Cluster-51324.133051				Cluster-51324.98562
Cluster-51324.127896		Cluster-51324.109838											Cluster-51324.105831	Cluster-51324.104596				Cluster-51324.102973
Cluster-51324.150739		Cluster-51324.103157											Cluster-51324.97448	Cluster-51324.112445				Cluster-51324.135534
Cluster-51324.104232		Cluster-51324.105445											Cluster-51324.116296	Cluster-51324.54858				Cluster-51324.72230
Cluster-51324.86727		Cluster-51324.40908											Cluster-51324.87737	Cluster-51324.81231				Cluster-51324.51889
Cluster-51324.112348		Cluster-51324.91994											Cluster-51324.95424	Cluster-51324.172981				Cluster-51324.103136
Cluster-51324.124476		Cluster-51324.136623											Cluster-51324.110655	Cluster-51324.148771				Cluster-51324.74157
Cluster-51324.75501		Cluster-51324.145148											Cluster-51324.91743	Cluster-51324.122964				Cluster-51324.130506
Cluster-51324.145347		Cluster-51324.85673											Cluster-51324.93550	Cluster-51324.93428				Cluster-51324.142739
Cluster-51324.101385		Cluster-51324.68255											Cluster-51324.97224	Cluster-51324.93922				Cluster-51324.141406
Cluster-51324.88503		Cluster-51324.111834											Cluster-51324.100602	Cluster-51324.89571				Cluster-51324.98623
Cluster-51324.147291		Cluster-51324.82015											Cluster-51324.90726	Cluster-51324.135833				Cluster-51324.62672
Cluster-51324.68617		Cluster-51324.123791											Cluster-51324.92117	Cluster-51324.80553				Cluster-51324.40340
Cluster-51324.92482		Cluster-51324.119690											Cluster-51324.91421	Cluster-51324.108931				Cluster-51324.128526
Cluster-51324.131402		Cluster-51324.107930											Cluster-51324.90177	Cluster-51324.100194				Cluster-51324.84228
Cluster-51324.87796		Cluster-51324.140911											Cluster-51324.93597	Cluster-51324.100740				Cluster-51324.92295
Cluster-51324.181983		Cluster-51324.112232											Cluster-51324.86979	Cluster-51324.98126				Cluster-51324.35161
Cluster-51324.111406		Cluster-51324.68734											Cluster-51324.97055	Cluster-51324.85240				Cluster-51324.44467
Cluster-59990.0		Cluster-51324.63663											Cluster-51324.99620	Cluster-51324.35227				Cluster-51324.92821
Cluster-51324.148112		Cluster-51324.63387											Cluster-51324.86295	Cluster-51324.153732				Cluster-51324.88143
Cluster-51324.69840		Cluster-51324.112377											Cluster-51324.99483	Cluster-51324.126395				Cluster-51324.62962
Cluster-51324.96337		Cluster-51324.137192											Cluster-51324.89129	Cluster-51324.113248				Cluster-51324.45457
Cluster-51324.125926		Cluster-51324.46481											Cluster-51324.96708	Cluster-51324.70509				Cluster-51324.101750
Cluster-51324.96933		Cluster-51324.140402											Cluster-51324.76373	Cluster-51324.98073				Cluster-51324.50965
Cluster-51324.130344		Cluster-51324.59591											Cluster-51324.79167	Cluster-51324.133714				Cluster-51324.125033
Cluster-51324.87020		Cluster-51324.103816											Cluster-51324.153416	Cluster-51324.147005				Cluster-51324.81230
Cluster-51324.89158		Cluster-51324.203389											Cluster-51324.85712	Cluster-51324.117388				Cluster-51324.142295
Cluster-51324.141466		Cluster-51324.101405											Cluster-51324.106300	Cluster-51324.87480				Cluster-51324.116962
Cluster-51324.115740		Cluster-51324.38064											Cluster-51324.178745	Cluster-51324.94741				Cluster-51324.49979
Cluster-51324.133740		Cluster-51324.83286											Cluster-51324.75273	Cluster-51324.96408				Cluster-51324.135183
Cluster-51324.65170		Cluster-51324.29863											Cluster-51324.105941	Cluster-51324.88561				Cluster-51324.137085
Cluster-51324.113587		Cluster-51324.114730											Cluster-51324.93536	Cluster-51324.50962				Cluster-51324.143125
Cluster-51324.90607		Cluster-51324.59661											Cluster-51324.54480	Cluster-51324.89275				Cluster-51324.178405
Cluster-51324.149521		Cluster-51324.72942											Cluster-51324.80378	Cluster-51324.157264				Cluster-51324.88763
Cluster-51324.63992		Cluster-51324.93903											Cluster-51324.97922	Cluster-51324.94710				Cluster-51324.118769
Cluster-51324.94202		Cluster-51324.159623											Cluster-51324.58551	Cluster-51324.150337				Cluster-51324.147432
Cluster-51324.90064		Cluster-51324.118977											Cluster-51324.92142	Cluster-51324.108337				Cluster-51324.48196
Cluster-51324.40317		Cluster-51324.203403											Cluster-51324.92349	Cluster-51324.90683				Cluster-51324.157061
Cluster-51324.104342		Cluster-51324.55835											Cluster-51324.86828	Cluster-51324.79265				Cluster-51324.119999
Cluster-51324.110313		Cluster-51324.74473											Cluster-51324.110836	Cluster-51324.95308				Cluster-51324.91718
Cluster-51324.97464		Cluster-51324.138864											Cluster-51324.105840	Cluster-51324.111634				Cluster-51324.42506
Cluster-51324.119270		Cluster-51324.96100											Cluster-51324.93454	Cluster-51324.91613				Cluster-51324.89569
Cluster-51324.92909		Cluster-51324.86044											Cluster-51324.103100	Cluster-51324.79866				Cluster-51324.91547
Cluster-51324.95421		Cluster-51324.120984											Cluster-51324.91575	Cluster-51324.78310				Cluster-51324.72540
Cluster-51324.90835		Cluster-51324.55412											Cluster-51324.94631	Cluster-51324.148290				Cluster-51324.73302
Cluster-51324.95185		Cluster-51324.110483											Cluster-51324.96913	Cluster-51324.46427				Cluster-51324.116144
Cluster-51324.63148		Cluster-51324.136243											Cluster-51324.74564	Cluster-51324.106381				Cluster-51324.116983
Cluster-51324.36777		Cluster-51324.152385											Cluster-51324.125015	Cluster-51324.109631				Cluster-51324.40244
[truncated: 17,983 more rows]
