# Supplementary material for: The Embryo Characteristics and Genes Expression Analysis Involved in Apomixis of Wild Germplasm Materials of Kentucky Bluegrass in Gansu Province of China
Source: Research Square preprint supplement (doi:10.21203/rs.3.rs-146413/v1), 2021-01-18
Supplement: Supplementary file 3 [file c4875ebf958f8e3244b281fa.xlsx]

## Sheet: Sheet1
Table S1 Samples mapping statistics
Sample name	Total reads	Total mapped
LPreM_1	43642354	29095590(66.67%)
LPreM_2	51404622	33639666(65.44%)
LPreM_3	40960736	26781928(65.38%)
LM_1	42760978	28006316(65.50%)
LM_2	43936238	28029430(63.80%)
LM_3	43525986	28090412(64.54%)
LPostM_1	44153268	29056366(65.81%)
LPostM_2	44789710	28242098(63.05%)
LPostM_3	39258204	26076324(66.42%)
LA_1	42984780	29301242(68.17%)
LA_2	42769556	28003730(65.48%)
LA_3	44031282	29276116(66.49%)
GPreM_1	40102780	26600058(66.33%)
GPreM_2	44246584	30025284(67.86%)
GPreM_3	41385328	27355114(66.10%)
GM_1	44051048	28982086(65.79%)
GM_2	44734836	29895376(66.83%)
GM_3	41215044	27336198(66.33%)
GPostM_1	42106294	28296716(67.20%)
GPostM_2	43093270	28842646(66.93%)
GPostM_3	42817202	30122042(70.35%)
GA_1	42134204	27806430(65.99%)
GA_2	42338298	28569938(67.48%)
GA_3	39925836	27984582(70.09%)
